# Supplementary material
Source: publisher site journal article supplement (https://www.dovepress.com/get_supplementary_file.php?f=259192.docx)
Supplement: Supplementary file 1 [file get_supplementary_file.php]

**Supplementary Table S1** Genes differentially expressed between the primary and metastatic ccRCC tissues in GSE22541

| Probe | logFC | AveExpr | t | P.Value | adj.P.Val | B | Gene |
| --- | --- | --- | --- | --- | --- | --- | --- |
| 211357_s_at | -1.965749397 | 5.655870205 | -2.920204224 | 0.005307346 | 0.049765872 | -2.421528368 | ALDOB |
| 209735_at | -1.028452603 | 6.278454409 | -2.924865598 | 0.005240465 | 0.049315357 | -2.41019269 | ABCG2 |
| 210432_s_at | 1.39951842 | 3.840234023 | 2.926892846 | 0.005211624 | 0.049146488 | -2.405258893 | SCN3A |
| 218424_s_at | 1.124125865 | 7.87868568 | 2.929321539 | 0.005177266 | 0.048956594 | -2.399344998 | STEAP3 |
| 227870_at | 1.397284545 | 4.892514518 | 2.933038849 | 0.005125088 | 0.048614532 | -2.390286793 | IGDCC4 |
| 229479_at | 1.045719365 | 4.687317956 | 2.936161424 | 0.005081636 | 0.048387053 | -2.382671739 |  |
| 212187_x_at | 1.183416713 | 8.429225105 | 2.938735708 | 0.005046073 | 0.048216365 | -2.376389638 | PTGDS |
| 217179_x_at | 1.33089118 | 7.032242075 | 2.939896682 | 0.00503011 | 0.04811429 | -2.373555248 |  |
| 206893_at | -1.367879813 | 7.17150684 | -2.943917516 | 0.00497519 | 0.047840045 | -2.363732913 | SALL1 |
| 206775_at | -1.237755185 | 7.406301445 | -2.948025086 | 0.004919662 | 0.047557023 | -2.353689229 | CUBN |
| 209758_s_at | 1.017550985 | 4.561247997 | 2.956561856 | 0.004806103 | 0.046811976 | -2.332784899 | MFAP5 |
| 204622_x_at | 1.199002412 | 6.832220767 | 2.957166878 | 0.004798148 | 0.046775515 | -2.331301797 | NR4A2 |
| 230022_at | -2.132344399 | 7.289852393 | -2.958152579 | 0.004785215 | 0.04671159 | -2.328885086 | CLEC18A |
| 203453_at | 1.239548324 | 6.474691094 | 2.959980053 | 0.004761322 | 0.046586488 | -2.324403092 | SCNN1A |
| 212713_at | 1.247096767 | 6.480497053 | 2.970326933 | 0.004628133 | 0.045949373 | -2.298991278 | MFAP4 |
| 220376_at | -1.364347885 | 5.241290174 | -2.971196185 | 0.004617104 | 0.045904403 | -2.296853665 | LRRC19 |
| 226864_at | 1.03306408 | 4.29951602 | 2.977497266 | 0.004537884 | 0.045457822 | -2.281345768 | PKIA |
| 242881_x_at | 1.412165756 | 6.220890337 | 2.979013232 | 0.004519015 | 0.045302004 | -2.277611432 | BC017398 |
| 241764_at | -1.576011846 | 6.121467114 | -2.980426347 | 0.004501492 | 0.04517604 | -2.274129295 |  |
| 214669_x_at | 1.421414789 | 8.985972168 | 2.989628311 | 0.004388929 | 0.044462611 | -2.25142694 | IGKC |
| 220502_s_at | -1.655072175 | 4.895702564 | -2.990733406 | 0.00437559 | 0.044376807 | -2.24869736 | SLC13A1 |
| 211643_x_at | 1.361909349 | 7.608464337 | 2.994157919 | 0.004334492 | 0.04409086 | -2.240234516 | IGK |
| 227794_at | -1.716300874 | 6.681717256 | -2.994356711 | 0.004332118 | 0.044074941 | -2.23974305 | GLYATL1 |
| 221009_s_at | -1.183198842 | 11.1555106 | -2.997640104 | 0.004293073 | 0.043824455 | -2.231622462 | ANGPTL4 |
| 204705_x_at | -1.701602727 | 6.792217298 | -2.998523307 | 0.004282627 | 0.043758668 | -2.229437075 | ALDOB |
| 207298_at | -2.322700157 | 8.838249015 | -3.000330793 | 0.004261322 | 0.043647022 | -2.224963301 | SLC17A3 |
| 205499_at | 1.257429868 | 5.541125926 | 3.011004775 | 0.004137517 | 0.042844464 | -2.198506846 | SRPX2 |
| 230645_at | -1.324550632 | 7.747330394 | -3.01900905 | 0.004046895 | 0.042201785 | -2.178626194 | FRMD3 |
| 205222_at | -1.05361328 | 8.183631054 | -3.021642113 | 0.004017492 | 0.042031452 | -2.172078592 | EHHADH |
| 1556012_at | -1.193183097 | 7.182956872 | -3.022836944 | 0.004004216 | 0.041932673 | -2.169106164 | KLHDC7A |
| 226535_at | 1.721475252 | 7.646783496 | 3.042795943 | 0.003788428 | 0.040570911 | -2.119337565 | ITGB6 |
| 32128_at | 1.713689866 | 8.124275979 | 3.043223495 | 0.003783927 | 0.040565921 | -2.118269061 | CCL18 |
| 1555014_x_at | 1.058748031 | 4.754363368 | 3.046448903 | 0.003750133 | 0.040346026 | -2.110205171 |  |
| 229331_at | -1.152739659 | 7.456387994 | -3.047740038 | 0.003736684 | 0.040240932 | -2.106975596 | SPATA18 |
| 211645_x_at | 1.759773877 | 6.935748275 | 3.049196206 | 0.003721571 | 0.040149349 | -2.103332127 | IGKV1-17 |
| 208450_at | -1.460122167 | 7.815027346 | -3.051225656 | 0.003700604 | 0.040012124 | -2.098252328 | LGALS2 |
| 205923_at | 1.063063906 | 5.364036203 | 3.051472388 | 0.003698062 | 0.040006241 | -2.097634595 | RELN |
| 202992_at | 1.759530194 | 7.738626453 | 3.054765076 | 0.0036643 | 0.039751116 | -2.089387649 | C7 |
| 244026_at | 1.215655288 | 5.847653001 | 3.055288133 | 0.003658964 | 0.039710133 | -2.088077046 |  |
| 206382_s_at | -1.103147495 | 4.791685061 | -3.059862119 | 0.003612607 | 0.039464396 | -2.076609866 | BDNF |
| 206963_s_at | -2.133970056 | 8.314402461 | -3.061494952 | 0.003596193 | 0.0393502 | -2.072513535 | NAT8 |
| 231483_at | -1.448936611 | 4.774846799 | -3.067528632 | 0.003536141 | 0.038913634 | -2.057364161 | LOC100505985 |
| 217378_x_at | 1.379215974 | 7.986216538 | 3.069271251 | 0.003518974 | 0.038835866 | -2.052985125 | IGKV1OR2-108 |
| 214777_at | 1.437293105 | 7.600390753 | 3.071332547 | 0.003498767 | 0.038710393 | -2.047803168 | abParts |
| 204955_at | 1.243952329 | 6.864474131 | 3.072015301 | 0.003492098 | 0.038685076 | -2.046086268 | SRPX |
| 209982_s_at | -1.104599912 | 5.708245784 | -3.076119724 | 0.003452259 | 0.038428115 | -2.035759693 | NRXN2 |
| 215946_x_at | 1.173090449 | 8.904102797 | 3.077042065 | 0.003443365 | 0.038351189 | -2.033437869 | IGLL3P |
| 211527_x_at | -1.235894135 | 9.502281436 | -3.077829381 | 0.00343579 | 0.038323016 | -2.031455582 | VEGFA |
| 221529_s_at | -1.23755771 | 9.908506503 | -3.079041251 | 0.003424161 | 0.038283012 | -2.028403711 | PLVAP |
| 235456_at | -1.171293022 | 6.646541957 | -3.080027632 | 0.003414724 | 0.038219041 | -2.025919111 |  |
| 207184_at | -1.151399802 | 6.9042821 | -3.088007723 | 0.003339262 | 0.037776568 | -2.005798787 | SLC6A13 |
| 203074_at | 1.21713345 | 5.985339437 | 3.092786658 | 0.003294824 | 0.037452078 | -1.993733237 | ANXA8 |
| 230319_at | 2.290081505 | 6.506005582 | 3.09623351 | 0.003263118 | 0.037235702 | -1.985023257 |  |
| 204223_at | 1.033318783 | 7.424488527 | 3.09997224 | 0.003229051 | 0.036978647 | -1.975568543 | PRELP |
| 217157_x_at | 1.131969405 | 6.490598526 | 3.101091161 | 0.003218921 | 0.036927088 | -1.972737501 | IGK |
| 206343_s_at | -1.130760004 | 4.922035827 | -3.109483957 | 0.003143882 | 0.036402322 | -1.951481177 | NRG1 |
| 217480_x_at | 1.068941649 | 8.131409904 | 3.11533335 | 0.003092559 | 0.035997488 | -1.936644346 | AC128677.4 |
| 211737_x_at | 1.434801726 | 7.545797037 | 3.121095419 | 0.003042774 | 0.035662092 | -1.922011276 | PTN |
| 205768_s_at | -1.743777344 | 6.509613514 | -3.124671093 | 0.003012259 | 0.035404706 | -1.912921832 | SLC27A2 |
| 208394_x_at | -1.215973777 | 7.360046175 | -3.129912051 | 0.002968053 | 0.035055967 | -1.899586994 | ESM1 |
| 216853_x_at | 1.17246669 | 6.414883886 | 3.131816861 | 0.002952138 | 0.034928925 | -1.894736901 | IGLJ3 |
| 205267_at | 1.541941375 | 5.824600373 | 3.133021224 | 0.002942117 | 0.034886192 | -1.891669323 | LOC101928620 |
| 206964_at | -1.48896286 | 6.075735838 | -3.144009436 | 0.002852154 | 0.034242757 | -1.863646533 | NAT8B |
| 227530_at | -1.109975325 | 8.593794405 | -3.146198999 | 0.00283454 | 0.034100076 | -1.858055007 | AKAP12 |
| 224428_s_at | 1.008590948 | 6.477161569 | 3.14688833 | 0.002829016 | 0.034047199 | -1.856294131 | CDCA7 |
| 209924_at | 1.592011623 | 7.714046821 | 3.14846423 | 0.002816425 | 0.03393099 | -1.852267604 | CCL18 |
| 203820_s_at | 1.671688416 | 5.763863384 | 3.151995175 | 0.002788405 | 0.033736674 | -1.843241097 | IGF2BP3 |
| 209612_s_at | 2.064353762 | 6.752033857 | 3.15338342 | 0.00277746 | 0.033686257 | -1.839690403 | ADH1B |
| 203953_s_at | -1.146076141 | 6.16066638 | -3.155625048 | 0.002759874 | 0.033570763 | -1.833954899 | CLDN3 |
| 205870_at | 1.091861226 | 6.777161593 | 3.168858004 | 0.002658173 | 0.032844206 | -1.800043286 | BDKRB2 |
| 211644_x_at | 1.611283268 | 8.536552079 | 3.170903577 | 0.002642771 | 0.032673893 | -1.794793051 | IGK |
| 209368_at | -1.024836721 | 6.739416143 | -3.173301013 | 0.002624826 | 0.032535109 | -1.788636949 | EPHX2 |
| 236180_at | -1.133478579 | 7.119642222 | -3.175857281 | 0.002605819 | 0.03234351 | -1.782069723 |  |
| 224179_s_at | -1.719017616 | 7.12979632 | -3.182760494 | 0.002555137 | 0.031931912 | -1.764318015 | MIOX |
| 219962_at | -2.061298297 | 6.309688125 | -3.183785835 | 0.002547689 | 0.031882557 | -1.761679239 | ACE2 |
| 205769_at | -1.740077372 | 7.088801714 | -3.184591086 | 0.002541854 | 0.031838973 | -1.759606495 | SLC27A2 |
| 218145_at | 1.041504573 | 8.740712058 | 3.189073841 | 0.002509601 | 0.031570406 | -1.748061628 | TRIB3 |
| 228051_at | 1.119261129 | 6.970375658 | 3.190986479 | 0.002495957 | 0.031458381 | -1.743132681 | KIAA1244 |
| 205249_at | 1.064841098 | 7.94097106 | 3.191525755 | 0.002492123 | 0.031418655 | -1.741742605 | EGR2 |
| 239331_at | 1.071643237 | 6.801172976 | 3.195515381 | 0.002463929 | 0.031256458 | -1.731454014 |  |
| 214836_x_at | 1.332314393 | 9.69604321 | 3.198127937 | 0.00244563 | 0.031116582 | -1.724712235 | IGK |
| 208470_s_at | 2.042302113 | 5.83097672 | 3.202361648 | 0.002416249 | 0.030950503 | -1.713779586 | HP |
| 218469_at | 1.899789485 | 4.79100083 | 3.203559694 | 0.002407995 | 0.030890924 | -1.710684225 | GREM1 |
| 219866_at | 1.202996682 | 6.486710246 | 3.205585233 | 0.002394101 | 0.030810175 | -1.705449219 | CLIC5 |
| 204457_s_at | 1.176141934 | 6.909339554 | 3.206575638 | 0.002387335 | 0.030746446 | -1.702888754 | GAS1 |
| 219796_s_at | -1.347300382 | 7.035754095 | -3.207840237 | 0.002378722 | 0.03069838 | -1.699618694 | CDHR5 |
| 209220_at | 1.022122586 | 5.486337767 | 3.212363144 | 0.002348156 | 0.030459178 | -1.68791647 | GPC3 |
| 228988_at | -1.487249105 | 6.408592483 | -3.213484095 | 0.002340638 | 0.030416774 | -1.685014594 | ZNF711 |
| 235147_at | -1.203807466 | 5.446835038 | -3.213288985 | 0.002341945 | 0.030416774 | -1.685519733 |  |
| 242773_at | -1.213775921 | 5.320415477 | -3.213688927 | 0.002339267 | 0.030416774 | -1.684484263 | SLC5A1 |
| 209466_x_at | 1.171178033 | 7.899108634 | 3.215137389 | 0.002329592 | 0.030360256 | -1.680733438 | PTN |
| 205908_s_at | 1.091989761 | 3.887427012 | 3.222029286 | 0.002284072 | 0.029976384 | -1.662872103 | OMD |
| 227404_s_at | 1.151396593 | 11.68420414 | 3.226012812 | 0.002258145 | 0.029817975 | -1.652537223 | EGR1 |
| 219686_at | -1.136136392 | 6.977918045 | -3.227615341 | 0.002247794 | 0.029750216 | -1.648377345 | STK32B |
| 228635_at | -1.22215255 | 5.391072826 | -3.232552695 | 0.002216183 | 0.029464681 | -1.635552688 | PCDH10 |
| 35974_at | -1.108072328 | 6.485278886 | -3.23252827 | 0.002216339 | 0.029464681 | -1.635616162 | LRMP |
| 203180_at | 1.310955134 | 7.978030245 | 3.234618557 | 0.002203082 | 0.029357422 | -1.630183004 | ALDH1A3 |
| 214768_x_at | 1.615867147 | 7.170602913 | 3.234801351 | 0.002201926 | 0.029354731 | -1.629707774 | IGKC |
| 227510_x_at | 1.180379249 | 8.080029677 | 3.237261792 | 0.002186426 | 0.029212189 | -1.623309442 | MALAT1 |
| 217319_x_at | -1.781797169 | 4.913505636 | -3.244996118 | 0.002138369 | 0.028852325 | -1.6031766 | CYP4A11 |
| 222257_s_at | -1.891507946 | 6.925842921 | -3.244927246 | 0.002138792 | 0.028852325 | -1.603356008 | ACE2 |
| 227140_at | 1.636357439 | 8.582719268 | 3.246380804 | 0.002129871 | 0.02880157 | -1.599569014 | INHBA |
| 221950_at | -2.141451926 | 7.099406854 | -3.248186142 | 0.00211884 | 0.028753434 | -1.594864036 | EMX2 |
| 213456_at | 1.48898098 | 5.571143242 | 3.267302599 | 0.002005301 | 0.027882073 | -1.544943573 | SOSTDC1 |
| 226777_at | 1.557373026 | 5.894679256 | 3.266911281 | 0.002007566 | 0.027882073 | -1.545967288 | ADAM12 |
| 212171_x_at | -1.131794124 | 10.86803004 | -3.27653957 | 0.001952526 | 0.027451048 | -1.520756953 | VEGFA |
| 221019_s_at | 1.616139701 | 6.044898014 | 3.278177894 | 0.001943304 | 0.027384052 | -1.516462646 | COLEC12 |
| 214455_at | -1.174686233 | 4.856465834 | -3.280746504 | 0.001928928 | 0.027258754 | -1.509727232 | HIST1H2BC |
| 202283_at | 1.297686485 | 9.125808233 | 3.28496387 | 0.001905542 | 0.027033089 | -1.498661362 | SERPINF1 |
| 201693_s_at | 1.18103957 | 8.97625438 | 3.285111201 | 0.00190473 | 0.027028581 | -1.498274625 | EGR1 |
| 209355_s_at | -1.058188323 | 10.38381857 | -3.291746452 | 0.001868495 | 0.026770085 | -1.480846236 | PPAP2B |
| 218692_at | 1.74058951 | 6.645224436 | 3.296017446 | 0.001845517 | 0.026546608 | -1.469616402 | SYBU |
| 219304_s_at | -1.22657903 | 8.168171412 | -3.305471811 | 0.001795602 | 0.02608339 | -1.444725901 | PDGFD |
| 206432_at | 1.15265316 | 4.321977755 | 3.310878718 | 0.001767634 | 0.025854834 | -1.430471437 | HAS2 |
| 236335_at | 1.18503641 | 6.296654066 | 3.312801446 | 0.001757788 | 0.025762714 | -1.425399021 | GUCY1A2 |
| 228335_at | 1.364482618 | 4.922066502 | 3.313359263 | 0.001754941 | 0.025744944 | -1.423927085 | CLDN11 |
| 205990_s_at | 1.185986829 | 6.440199375 | 3.317637908 | 0.001733251 | 0.02552262 | -1.412631794 | WNT5A |
| 220327_at | 1.150353105 | 4.056974849 | 3.318576266 | 0.001728528 | 0.025473657 | -1.410153407 | VGLL3 |
| 206628_at | -1.306321697 | 5.07669955 | -3.318837526 | 0.001727215 | 0.025461173 | -1.409463292 | SLC5A1 |
| 214203_s_at | -1.006740233 | 7.480055178 | -3.323025096 | 0.001706302 | 0.025207261 | -1.398397345 | LOC102724788 |
| 227526_at | -1.10428272 | 6.285488842 | -3.324097358 | 0.001700986 | 0.025196894 | -1.395562445 | CDON |
| 232054_at | 1.014814861 | 3.66169164 | 3.327862652 | 0.001682442 | 0.025032944 | -1.385603145 | LOC101926951 |
| 207407_x_at | -2.395723041 | 6.138396978 | -3.329687573 | 0.001673524 | 0.024979497 | -1.380773706 | CYP4A11 |
| 227061_at | 1.677547299 | 5.693341687 | 3.332437882 | 0.001660167 | 0.024882029 | -1.373492286 | LINC01279 |
| 207847_s_at | 1.038208988 | 8.136291468 | 3.337608062 | 0.001635333 | 0.024658524 | -1.359794361 | MUC1 |
| 203381_s_at | -1.160812281 | 9.333368423 | -3.346958468 | 0.001591311 | 0.024247161 | -1.334988512 | APOE |
| 207172_s_at | 1.16193575 | 7.302355392 | 3.346883066 | 0.001591662 | 0.024247161 | -1.335188714 | CDH11 |
| 243296_at | 1.302303996 | 8.400030202 | 3.346601041 | 0.001592973 | 0.024247161 | -1.335937511 | NAMPT |
| 240384_at | -1.188799332 | 5.631555766 | -3.349615118 | 0.00157901 | 0.024121932 | -1.327932954 |  |
| 208016_s_at | -1.209990877 | 5.140909541 | -3.352323854 | 0.001566561 | 0.024005534 | -1.320735575 | AGTR1 |
| 209398_at | -1.235486775 | 8.484713482 | -3.354713603 | 0.001555656 | 0.023912141 | -1.314382846 | HIST1H1C |
| 228636_at | 1.076733745 | 5.925259398 | 3.355757982 | 0.001550913 | 0.023866069 | -1.311605688 | BHLHE22 |
| 1554485_s_at | -1.1175009 | 9.295074247 | -3.361356582 | 0.001525718 | 0.023652493 | -1.296709272 | TMEM37 |
| 204606_at | 1.213821395 | 6.338689912 | 3.361664212 | 0.001524345 | 0.023643568 | -1.295890315 | CCL21 |
| 214285_at | -1.54854632 | 5.651950091 | -3.36348991 | 0.001516221 | 0.023571046 | -1.291029097 | FABP3 |
| 230560_at | 1.516393715 | 5.699663449 | 3.365600942 | 0.001506878 | 0.023452474 | -1.285406142 | STXBP6 |
| 206651_s_at | 1.276593316 | 3.711988858 | 3.373574853 | 0.001472078 | 0.023121477 | -1.26414762 | CPB2 |
| 205430_at | 1.030537585 | 3.606032048 | 3.377017201 | 0.001457292 | 0.023016059 | -1.25496093 | BMP5 |
| 205529_s_at | 1.153665379 | 6.286209514 | 3.379811247 | 0.001445395 | 0.022908914 | -1.247500243 | RUNX1T1 |
| 221590_s_at | -1.113966309 | 5.872218429 | -3.379677727 | 0.001445961 | 0.022908914 | -1.247856853 | ALDH6A1 |
| 206239_s_at | 1.750207903 | 6.945613061 | 3.383896861 | 0.001428163 | 0.022785648 | -1.236584131 | SPINK1 |
| 230372_at | 1.16488761 | 4.439093365 | 3.3847613 | 0.001424543 | 0.022740694 | -1.234273474 | HAS2 |
| 206517_at | -1.595120828 | 8.473333055 | -3.386695586 | 0.001416473 | 0.022658176 | -1.22910182 | CDH16 |
| 230424_at | 1.010720547 | 7.515779178 | 3.401747929 | 0.001355141 | 0.022054585 | -1.188796359 | NREP |
| 209613_s_at | 2.380856268 | 6.274465906 | 3.408466878 | 0.001328587 | 0.021769199 | -1.170770704 | ADH1B |
| 215176_x_at | 1.978264977 | 8.875520667 | 3.417385282 | 0.001294105 | 0.021359456 | -1.146811669 | IGK |
| 232383_at | -1.365339198 | 6.958305706 | -3.417738496 | 0.001292757 | 0.02134747 | -1.145862004 | TFEC |
| 236193_at | -1.107938116 | 5.68219982 | -3.420732538 | 0.001281384 | 0.021210919 | -1.137809774 | HIST1H2BC |
| 216401_x_at | 1.631985771 | 7.784468698 | 3.427901763 | 0.001254538 | 0.02093768 | -1.118511765 | IGKV1-37 |
| 37892_at | 2.524631121 | 6.465003731 | 3.431430517 | 0.001241521 | 0.020834917 | -1.109004346 | COL11A1 |
| 228731_at | 1.321992663 | 7.933536627 | 3.431768456 | 0.001240281 | 0.020820501 | -1.108093543 | GUCY1A2 |
| 241681_at | 1.090488045 | 6.972386544 | 3.433969498 | 0.001232235 | 0.020729491 | -1.102160071 |  |
| 235236_at | -1.2665754 | 4.107876168 | -3.436553585 | 0.001222852 | 0.020642 | -1.095191139 |  |
| 206115_at | 1.440466498 | 6.693168376 | 3.442316139 | 0.001202172 | 0.020396229 | -1.079639188 | EGR3 |
| 221132_at | 1.305969544 | 4.174852226 | 3.447940452 | 0.00118231 | 0.020194567 | -1.064445541 | CLDN18 |
| 228885_at | 1.48334192 | 4.762081426 | 3.453223116 | 0.00116394 | 0.020007183 | -1.050161571 | MAMDC2 |
| 217523_at | 1.262677781 | 5.13816393 | 3.455955137 | 0.001154546 | 0.019925757 | -1.04276934 | CD44 |
| 212592_at | 2.114303071 | 9.237203502 | 3.458534393 | 0.001145744 | 0.019860116 | -1.035787313 | IGJ |
| 218772_x_at | -1.189639532 | 7.608067229 | -3.45953176 | 0.001142357 | 0.019834357 | -1.03308663 | TMEM38B |
| 210067_at | 1.335990784 | 3.329953208 | 3.462858339 | 0.001131131 | 0.019720852 | -1.024075586 | AQP4 |
| 227529_s_at | -1.469221242 | 6.466386552 | -3.466246003 | 0.001119807 | 0.019604686 | -1.014893877 | AKAP12 |
| 204359_at | 1.37779721 | 6.110351071 | 3.467166832 | 0.001116747 | 0.019582964 | -1.012397214 | FLRT2 |
| 205414_s_at | 1.083743086 | 6.295441986 | 3.467989565 | 0.001114021 | 0.019567327 | -1.010166192 | ARHGAP44 |
| 229893_at | -1.297249535 | 7.349502368 | -3.46991726 | 0.001107656 | 0.019504386 | -1.004937617 | FRMD3 |
| 231856_at | 1.003072222 | 5.016095488 | 3.476981016 | 0.001084631 | 0.019235229 | -0.985763803 | KIAA1244 |
| 1558881_at | -1.161571824 | 4.986635717 | -3.478281845 | 0.001080441 | 0.019186828 | -0.982230367 | LINC00924 |
| 236361_at | -1.206685652 | 6.224374281 | -3.478277414 | 0.001080455 | 0.019186828 | -0.982242404 | GALNT15 |
| 219568_x_at | -1.163269012 | 5.40095691 | -3.480874463 | 0.001072136 | 0.019119056 | -0.975185758 | SOX18 |
| 241694_at | -1.728290406 | 6.199246141 | -3.482588282 | 0.001066679 | 0.019052821 | -0.970527331 | PKHD1 |
| 220994_s_at | 1.063417466 | 5.851593227 | 3.483945825 | 0.001062376 | 0.019000783 | -0.966836372 | STXBP6 |
| 225242_s_at | 1.637022962 | 7.58370105 | 3.492287117 | 0.001036295 | 0.018724199 | -0.944139332 | CCDC80 |
| 225664_at | 1.363455652 | 8.614736135 | 3.493681837 | 0.001031994 | 0.01871452 | -0.940341166 | COL12A1 |
| 216576_x_at | 1.887653099 | 7.182772191 | 3.494566465 | 0.001029275 | 0.018690008 | -0.937931653 | IGK |
| 204320_at | 2.257576864 | 6.533322791 | 3.510627442 | 0.000981082 | 0.018110684 | -0.894124228 | COL11A1 |
| 208284_x_at | -1.005709849 | 9.755374486 | -3.510722352 | 0.000980803 | 0.018110684 | -0.893865012 | GGT1 |
| 235146_at | -1.157216508 | 7.439538564 | -3.510607455 | 0.00098114 | 0.018110684 | -0.894178815 | TMCC3 |
| 213068_at | 1.263834236 | 4.515625094 | 3.512011574 | 0.000977031 | 0.018083669 | -0.890343499 | DPT |
| 228469_at | -1.027619945 | 6.582889353 | -3.520299829 | 0.000953106 | 0.017796406 | -0.867686386 |  |
| 219612_s_at | 3.197346176 | 7.073344374 | 3.522006628 | 0.000948249 | 0.017755729 | -0.863016807 | FGG |
| 207173_x_at | 1.521379263 | 9.273622998 | 3.526024332 | 0.000936909 | 0.017609316 | -0.85201978 | CDH11 |
| 223315_at | -1.494327216 | 8.073274339 | -3.526124148 | 0.000936629 | 0.017609316 | -0.851746478 | NTN4 |
| 1558048_x_at | -1.455024908 | 3.268052987 | -3.527565815 | 0.000932593 | 0.017570471 | -0.847798616 |  |
| 209540_at | 1.256990566 | 6.334786416 | 3.532561811 | 0.000918734 | 0.017411356 | -0.834110444 | IGF1 |
| 230135_at | 1.167479898 | 4.555540455 | 3.532919319 | 0.00091775 | 0.017398736 | -0.83313051 | HHIP |
| 242052_at | 1.247662976 | 6.534434626 | 3.534865045 | 0.000912411 | 0.017345631 | -0.827796254 |  |
| 232056_at | 1.2157116 | 3.215865069 | 3.539213069 | 0.000900588 | 0.017199104 | -0.815869986 | SCEL |
| 220075_s_at | -1.881969117 | 5.724347133 | -3.543036272 | 0.000890313 | 0.017085615 | -0.805376361 | CDHR5 |
| 227449_at | -1.172888318 | 5.503479456 | -3.543144827 | 0.000890023 | 0.017085615 | -0.805078315 | EPHA4 |
| 206595_at | 1.219070886 | 5.597073525 | 3.546511002 | 0.000881072 | 0.017004102 | -0.79583361 | CST6 |
| 205404_at | 1.168672368 | 6.063105249 | 3.547612979 | 0.000878161 | 0.016973764 | -0.792806109 | HSD11B1 |
| 205935_at | 1.180008193 | 6.786989875 | 3.554028073 | 0.000861393 | 0.016789405 | -0.77517109 | FOXF1 |
| 216207_x_at | 1.486581976 | 8.907117668 | 3.556254473 | 0.000855646 | 0.016725935 | -0.769046521 | IGKC |
| 242600_at | -1.165164004 | 5.638909279 | -3.565432457 | 0.000832338 | 0.016405223 | -0.743776048 | FRMD3 |
| 211829_s_at | -1.040969957 | 4.744893687 | -3.572343274 | 0.00081519 | 0.016188029 | -0.724723684 | GPER1 |
| 227399_at | 1.69832421 | 5.660160608 | 3.57564297 | 0.000807122 | 0.016115634 | -0.71561946 | VGLL3 |
| 238865_at | -1.041660829 | 7.054923763 | -3.58196156 | 0.000791885 | 0.015976504 | -0.698172586 | PABPC4L |
| 213790_at | 1.348529761 | 5.755262438 | 3.585425702 | 0.000783649 | 0.015868572 | -0.688600069 | ADAM12 |
| 231512_at | 1.343710889 | 3.258302282 | 3.590832049 | 0.000770959 | 0.015741127 | -0.673650268 | ATP13A4-AS1 |
| 202952_s_at | 1.251064725 | 5.685907539 | 3.592421988 | 0.000767264 | 0.015705788 | -0.66925132 | ADAM12 |
| 229373_at | -1.306988344 | 5.986014845 | -3.592443139 | 0.000767215 | 0.015705788 | -0.669192791 |  |
| 230661_at | 1.26531152 | 6.67230501 | 3.593348305 | 0.000765119 | 0.015679698 | -0.666687937 |  |
| 222736_s_at | -1.035601364 | 7.073486922 | -3.59464202 | 0.000762134 | 0.015665286 | -0.663107246 | TMEM38B |
| 235155_at | -1.063860862 | 5.436708818 | -3.600308683 | 0.000749187 | 0.01548065 | -0.647414805 | BDH2 |
| 208180_s_at | -1.046948021 | 4.288483628 | -3.608364783 | 0.000731143 | 0.015263795 | -0.625081691 | HIST1H4H |
| 215071_s_at | -1.060050146 | 8.842152199 | -3.609843319 | 0.000727877 | 0.015230261 | -0.620979876 | HIST1H2AC |
| 203819_s_at | 2.021369789 | 5.502843411 | 3.610459895 | 0.000726519 | 0.015209592 | -0.619269072 | IGF2BP3 |
| 211417_x_at | -1.017799541 | 9.822871516 | -3.61148353 | 0.00072427 | 0.015189669 | -0.616428447 | GGT1 |
| 227695_at | -1.204722146 | 6.155771459 | -3.612006356 | 0.000723124 | 0.015183856 | -0.614977415 | GLYATL1 |
| 1561167_at | 1.128125698 | 4.766610461 | 3.618600573 | 0.000708817 | 0.015021147 | -0.596666039 |  |
| 205700_at | 1.684403057 | 4.644368644 | 3.624139811 | 0.000697009 | 0.014839931 | -0.581269922 | HSD17B6 |
| 235981_at | 2.675456537 | 5.709783357 | 3.626391844 | 0.000692262 | 0.014780502 | -0.575006749 | C8orf22 |
| 210809_s_at | 1.658042254 | 10.40320095 | 3.627943042 | 0.00068901 | 0.014777504 | -0.570691434 | POSTN |
| 241547_at | -2.20420361 | 6.199709738 | -3.628525759 | 0.000687793 | 0.014766897 | -0.569070095 | A1CF |
| 205206_at | 1.143599696 | 7.403982345 | 3.631281847 | 0.000682061 | 0.01471541 | -0.561399673 | KAL1 |
| 236313_at | 1.026773109 | 6.054275843 | 3.634046896 | 0.000676358 | 0.014628106 | -0.553701087 | CDKN2B |
| 208383_s_at | -2.776126373 | 7.017919906 | -3.641719314 | 0.000660769 | 0.014422172 | -0.532322262 | PCK1 |
| 226534_at | 1.082846371 | 8.697519086 | 3.643864162 | 0.000656473 | 0.014385837 | -0.526341313 | KITLG |
| 215440_s_at | -1.094643967 | 8.360640363 | -3.645484785 | 0.000653245 | 0.014336108 | -0.521820892 | BEX4 |
| 241652_x_at | -1.077956942 | 3.576032861 | -3.647620728 | 0.000649014 | 0.01429733 | -0.515861402 | LIN7A |
| 210066_s_at | 1.380193225 | 3.484834733 | 3.648255866 | 0.00064776 | 0.014280766 | -0.514088933 | AQP4 |
| 37512_at | 1.750446494 | 4.215296374 | 3.651643265 | 0.000641116 | 0.014203005 | -0.50463293 | HSD17B6 |
| 242321_at | -1.208288615 | 5.315824665 | -3.65393797 | 0.000636652 | 0.014164159 | -0.498224477 | PTPN14 |
| 230147_at | 1.188069479 | 4.851328207 | 3.654572824 | 0.000635422 | 0.014151413 | -0.496451123 | F2RL2 |
| 1556037_s_at | 1.000430183 | 3.526006334 | 3.663599079 | 0.000618183 | 0.0139378 | -0.471219648 | HHIP |
| 223333_s_at | -1.474314574 | 9.177663016 | -3.666420014 | 0.000612888 | 0.01385842 | -0.463327205 | ANGPTL4 |
| 239058_at | -1.044898967 | 6.721506974 | -3.668682181 | 0.000608673 | 0.013801104 | -0.456995699 | FOXC2 |
| 209369_at | 1.883277375 | 6.038964908 | 3.671284705 | 0.000603859 | 0.013739332 | -0.44970895 | ANXA3 |
| 231399_at | -1.369471373 | 5.362830124 | -3.675412747 | 0.000596297 | 0.013641234 | -0.438145178 | RAB3IP |
| 223075_s_at | -1.787081375 | 7.681575237 | -3.676936306 | 0.000593529 | 0.013612088 | -0.43387549 | AIF1L |
| 823_at | -1.149169588 | 8.085549075 | -3.679525874 | 0.000588853 | 0.013546059 | -0.426616173 | CX3CL1 |
| 236656_s_at | -1.152133693 | 7.508019289 | -3.68753329 | 0.000574616 | 0.013329296 | -0.404151526 | LOC100288911 |
| 219908_at | 1.16198567 | 3.811517978 | 3.691312956 | 0.000568012 | 0.013226591 | -0.393538577 | DKK2 |
| 207265_s_at | 1.125421897 | 8.051610421 | 3.699492123 | 0.000553968 | 0.012982504 | -0.370552166 | KDELR3 |
| 205357_s_at | -2.000105637 | 5.701239963 | -3.7002166 | 0.00055274 | 0.012964703 | -0.368514804 | AGTR1 |
| 40284_at | 1.116936839 | 5.07280159 | 3.706289963 | 0.00054255 | 0.012806804 | -0.351426955 | FOXA2 |
| 209919_x_at | -1.077770689 | 9.705205506 | -3.706826399 | 0.000541658 | 0.012803794 | -0.349916931 | GGT1 |
| 240146_at | 1.097248503 | 5.98556555 | 3.707185143 | 0.000541063 | 0.012801358 | -0.34890703 |  |
| 207131_x_at | -1.109436797 | 9.123389666 | -3.707573069 | 0.00054042 | 0.012796652 | -0.347814917 | GGT1 |
| 220532_s_at | -1.575449685 | 10.87177838 | -3.707646553 | 0.000540298 | 0.012796652 | -0.347608033 | TMEM176B |
| 239348_at | 1.050856809 | 5.523670432 | 3.714598064 | 0.000528902 | 0.012622311 | -0.328027163 |  |
| 213110_s_at | 1.23253433 | 6.60356761 | 3.722448624 | 0.000516309 | 0.012428251 | -0.305890281 | COL4A5 |
| 243818_at | 1.02389617 | 5.19038982 | 3.723528744 | 0.000514599 | 0.012397185 | -0.302842621 | SFTA1P |
| 213285_at | 1.308746246 | 4.911092065 | 3.729664278 | 0.00050499 | 0.012287628 | -0.285521707 | TMEM30B |
| 238649_at | -1.089209785 | 5.046288337 | -3.731924705 | 0.000501493 | 0.012218857 | -0.279136585 | PITPNC1 |
| 220951_s_at | -1.386494869 | 6.8731017 | -3.73508828 | 0.000496638 | 0.012149296 | -0.270196845 | A1CF |
| 208978_at | -1.023335333 | 8.607450019 | -3.735509532 | 0.000495995 | 0.012146625 | -0.269006154 | CRIP2 |
| 228501_at | -1.351333876 | 5.769293032 | -3.735412175 | 0.000496143 | 0.012146625 | -0.269281346 | GALNT15 |
| 206884_s_at | 1.337462982 | 3.748991053 | 3.73607807 | 0.000495128 | 0.012139523 | -0.267399038 | SCEL |
| 227566_at | 1.447790169 | 7.754637847 | 3.740003051 | 0.000489185 | 0.012064139 | -0.256300544 | LOC102725271 |
| 227826_s_at | -1.511598865 | 5.634998856 | -3.740909141 | 0.000487823 | 0.012057739 | -0.253737555 |  |
| 214071_at | 1.147057796 | 5.095455057 | 3.743567754 | 0.000483847 | 0.011997431 | -0.246215439 | GNAL |
| 204154_at | 1.215624826 | 4.328203474 | 3.744677128 | 0.000482197 | 0.011972812 | -0.243075808 | CDO1 |
| 229218_at | 1.81156964 | 7.200876783 | 3.761867704 | 0.000457313 | 0.011607984 | -0.194362128 | COL1A2 |
| 233648_at | 1.002415685 | 4.836567334 | 3.76209072 | 0.000456999 | 0.011605387 | -0.193729385 |  |
| 241762_at | 1.077911288 | 3.719473909 | 3.763108258 | 0.000455566 | 0.011582539 | -0.19084217 | FBXO32 |
| 238853_at | -1.278221765 | 7.36171503 | -3.763950048 | 0.000454384 | 0.01157124 | -0.18845332 | RAB3IP |
| 220801_s_at | -1.622945934 | 5.447514706 | -3.767167688 | 0.000449894 | 0.011499736 | -0.179319648 | HAO2 |
| 221898_at | 1.042832011 | 4.544444191 | 3.773826501 | 0.000440736 | 0.011366621 | -0.160404779 | PDPN |
| 220979_s_at | 1.292218837 | 3.915322517 | 3.794993168 | 0.000412802 | 0.010908632 | -0.100163422 | ST6GALNAC5 |
| 232568_at | 1.1559272 | 5.315746452 | 3.799257621 | 0.000407384 | 0.010812458 | -0.088005372 | MGC24103 |
| 232431_at | 1.166050465 | 6.697206222 | 3.804485919 | 0.000400836 | 0.010727107 | -0.073089721 | NR3C1 |
| 206754_s_at | 1.371325452 | 5.386571487 | 3.811263428 | 0.000392497 | 0.010618397 | -0.053738588 | CYP2B6 |
| 241509_at | 1.495343416 | 4.885911637 | 3.81637126 | 0.000386324 | 0.01052953 | -0.039142968 |  |
| 227742_at | 2.09738997 | 5.85418822 | 3.81801728 | 0.000384354 | 0.010502028 | -0.034437322 | CLIC6 |
| 229778_at | -2.504587994 | 5.781171187 | -3.819384362 | 0.000382726 | 0.010478481 | -0.030528312 | SPX |
| 215447_at | 1.03223933 | 6.81729486 | 3.827211869 | 0.000373529 | 0.010304098 | -0.008132627 |  |
| 225458_at | -1.029031594 | 6.387758128 | -3.838582429 | 0.000360549 | 0.010078229 | 0.024442121 | PP7080 |
| 238215_at | -1.073783663 | 5.542387307 | -3.8567956 | 0.000340659 | 0.00968565 | 0.07672245 | SLC6A18 |
| 202310_s_at | 1.988829296 | 10.53719232 | 3.860180294 | 0.000337081 | 0.009613423 | 0.086451955 | COL1A1 |
| 228750_at | 1.778319882 | 5.962702474 | 3.864832345 | 0.000332222 | 0.009515035 | 0.099831602 |  |
| 205907_s_at | 1.535625754 | 4.381249787 | 3.873038162 | 0.000323816 | 0.009339421 | 0.123451988 | OMD |
| 1563209_a_at | 1.655710601 | 5.516137221 | 3.876385449 | 0.000320447 | 0.009287023 | 0.133094382 | MACROD2 |
| 235879_at | 1.053332848 | 7.589514271 | 3.876309006 | 0.000320523 | 0.009287023 | 0.132874128 |  |
| 227300_at | 1.389971362 | 6.000068964 | 3.881050802 | 0.000315807 | 0.009204014 | 0.146540664 | TMEM119 |
| 225846_at | 1.628678581 | 4.317660226 | 3.881860317 | 0.000315008 | 0.009185638 | 0.148874641 | ESRP1 |
| 228608_at | 1.108623712 | 4.906163341 | 3.896677424 | 0.000300732 | 0.00888306 | 0.191638098 | NALCN |
| 210258_at | 1.157632338 | 3.774103807 | 3.898506386 | 0.000299014 | 0.008841861 | 0.196922288 | RGS13 |
| 218345_at | -1.591822123 | 10.878043 | -3.901481076 | 0.00029624 | 0.008788341 | 0.205519329 | TMEM176A |
| 218211_s_at | 1.06783305 | 7.409781544 | 3.902998835 | 0.000294834 | 0.008760893 | 0.209907005 | MLPH |
| 201852_x_at | 1.669961179 | 11.08023921 | 3.904438136 | 0.000293507 | 0.008735695 | 0.214068653 | COL3A1 |
| 242121_at | 1.013126861 | 8.257359788 | 3.912719678 | 0.000285981 | 0.008595931 | 0.23802903 |  |
| 237483_at | 1.40156152 | 5.341318001 | 3.917205038 | 0.000281983 | 0.008494443 | 0.251016708 |  |
| 204134_at | -1.117350298 | 6.402472667 | -3.931361747 | 0.000269716 | 0.008238384 | 0.292056692 | PDE2A |
| 218847_at | 1.624632777 | 6.44706066 | 3.937261393 | 0.000264757 | 0.008156342 | 0.309181166 | IGF2BP2 |
| 213273_at | 1.142377367 | 5.809271262 | 3.938357091 | 0.000263846 | 0.008136369 | 0.312362958 | TENM4 |
| 206697_s_at | 2.465104201 | 6.362326457 | 3.939976466 | 0.000262505 | 0.008108734 | 0.317066249 | HP |
| 203559_s_at | -3.202088983 | 7.763984623 | -3.942038245 | 0.000260807 | 0.008092863 | 0.323055825 | AOC1 |
| 213832_at | 1.020945706 | 4.915138923 | 3.943433417 | 0.000259664 | 0.008075731 | 0.327109744 | KCND3 |
| 217979_at | 1.176482071 | 9.87757325 | 3.946108296 | 0.000257486 | 0.008044609 | 0.334884046 | TSPAN13 |
| 239296_at | 1.331051196 | 6.894978792 | 3.949956343 | 0.000254384 | 0.007984194 | 0.346072579 |  |
| 210081_at | 1.486490904 | 5.339198811 | 3.954529143 | 0.000250745 | 0.007919983 | 0.359375322 | AGER |
| 236114_at | 1.206580936 | 5.280151738 | 3.954890775 | 0.00025046 | 0.007915534 | 0.360427666 |  |
| 236179_at | 1.55131511 | 6.733793973 | 3.956581366 | 0.000249128 | 0.007896284 | 0.365347888 | CDH11 |
| 202404_s_at | 1.70517263 | 11.17462568 | 3.958995741 | 0.000247239 | 0.007863756 | 0.372376357 | COL1A2 |
| 215076_s_at | 1.48774627 | 11.76190019 | 3.961647038 | 0.00024518 | 0.007838324 | 0.380096932 | COL3A1 |
| 232150_at | 1.190739422 | 7.283590932 | 3.971021648 | 0.000238033 | 0.007691767 | 0.40741592 |  |
| 1555778_a_at | 1.97763349 | 8.28385755 | 3.979989269 | 0.000231385 | 0.007566383 | 0.433578142 | POSTN |
| 236699_at | 1.008791984 | 6.399849324 | 3.987455489 | 0.000225988 | 0.007456777 | 0.45538189 |  |
| 241869_at | -1.172545779 | 4.854097764 | -3.989244364 | 0.000224713 | 0.007428154 | 0.4606089 | APOL6 |
| 243981_at | 1.056665693 | 4.623391557 | 3.994922516 | 0.000220712 | 0.007322453 | 0.477207656 | STK4 |
| 224480_s_at | -1.279698322 | 6.170734406 | -3.997321819 | 0.000219042 | 0.00729805 | 0.484224866 | AGPAT9 |
| 1556194_a_at | -1.167547793 | 5.901949483 | -3.999153415 | 0.000217775 | 0.007280569 | 0.489583067 | HSPA4L |
| 243589_at | 1.035138183 | 6.476899291 | 3.999960104 | 0.000217219 | 0.007268345 | 0.491943353 | KANSL1 |
| 228656_at | 1.063719624 | 4.359841162 | 4.008166467 | 0.000211645 | 0.007155167 | 0.515967207 | PROX1 |
| 224396_s_at | 1.493685965 | 5.815789951 | 4.00979885 | 0.000210553 | 0.007154743 | 0.520748758 | ASPN |
| 222344_at | 1.265161752 | 5.756380127 | 4.01183 | 0.000209202 | 0.007126539 | 0.526699667 |  |
| 202465_at | 1.206194839 | 8.470604838 | 4.01772502 | 0.000205327 | 0.007047245 | 0.543979151 | PCOLCE |
| 227384_s_at | 1.047476083 | 8.048420713 | 4.01879613 | 0.00020463 | 0.007047245 | 0.547120084 | LOC102725188 |
| 1555497_a_at | 1.427862395 | 5.807240064 | 4.019476035 | 0.000204189 | 0.007043565 | 0.549114051 | CYP4B1 |
| 235301_at | 1.037820113 | 6.004435701 | 4.022369053 | 0.000202323 | 0.00699877 | 0.557600232 | KIAA1324L |
| 203083_at | 2.083637802 | 9.096437443 | 4.024500749 | 0.000200959 | 0.006994014 | 0.563855054 | THBS2 |
| 238178_at | -1.566724051 | 5.473324947 | -4.025257887 | 0.000200477 | 0.006989561 | 0.566077028 |  |
| 225288_at | -1.09794402 | 7.894418824 | -4.027724718 | 0.000198912 | 0.006965376 | 0.573317811 | COL27A1 |
| 229686_at | -1.117178948 | 7.003011771 | -4.027597891 | 0.000198993 | 0.006965376 | 0.57294549 | P2RY8 |
| 223782_s_at | -1.688461491 | 6.010872253 | -4.032378829 | 0.000195994 | 0.006909578 | 0.586984538 | TINAG |
| 238177_at | -1.236695493 | 5.597851389 | -4.039502097 | 0.000191606 | 0.00681593 | 0.607916328 | SLC6A19 |
| 205433_at | 1.9732747 | 5.410825292 | 4.040788575 | 0.000190824 | 0.006796952 | 0.611698513 | BCHE |
| 238852_at | 1.474018403 | 4.399733204 | 4.044708261 | 0.00018846 | 0.006743502 | 0.623225696 | PRRX1 |
| 221133_s_at | 1.501497921 | 4.548888015 | 4.048422749 | 0.000186246 | 0.006686159 | 0.634154269 | CLDN18 |
| 228977_at | 1.026881292 | 4.310433192 | 4.056369459 | 0.000181594 | 0.006557897 | 0.657550451 | LOC729680 |
| 205543_at | -1.011994756 | 6.211215978 | -4.065900293 | 0.000176163 | 0.006446922 | 0.685638782 | HSPA4L |
| 222067_x_at | -1.036312276 | 8.833416947 | -4.066630729 | 0.000175753 | 0.006444572 | 0.687792717 | HIST1H2BD |
| 231647_s_at | 1.058393879 | 3.22015446 | 4.071784614 | 0.000172889 | 0.006369731 | 0.702995796 | FCRL5 |
| 235649_at | 1.277242158 | 5.177075461 | 4.076301028 | 0.000170416 | 0.006316928 | 0.716325795 | ADAMTS8 |
| 226125_at | -1.694428801 | 7.108046579 | -4.082870487 | 0.000166879 | 0.006225508 | 0.735727491 | LOC100288152 |
| 210002_at | 1.640104866 | 6.796195952 | 4.084043141 | 0.000166256 | 0.00622486 | 0.73919223 | GATA6 |
| 224932_at | -1.068826236 | 9.895698262 | -4.084526123 | 0.000166 | 0.006220719 | 0.740619389 | CHCHD10 |
| 205208_at | -1.562329537 | 7.267037953 | -4.091346323 | 0.000162422 | 0.006158418 | 0.760780646 | ALDH1L1 |
| 1556329_a_at | -1.253604415 | 3.874154338 | -4.093786401 | 0.000161161 | 0.006126147 | 0.767997547 | PCDH10 |
| 1559391_s_at | 1.431306137 | 5.971437356 | 4.094393358 | 0.000160848 | 0.006125978 | 0.769793022 |  |
| 1552289_a_at | 1.280090818 | 4.787165176 | 4.096814959 | 0.000159608 | 0.006098231 | 0.776957721 | CILP2 |
| 205462_s_at | -1.268629628 | 8.582017854 | -4.106573707 | 0.000154703 | 0.005984571 | 0.805850257 | HPCAL1 |
| 232267_at | 1.162901927 | 4.657887098 | 4.11923856 | 0.000148555 | 0.005814066 | 0.843393689 | GPR133 |
| 235898_at | -1.615361178 | 6.055097941 | -4.119723395 | 0.000148325 | 0.005813364 | 0.844831972 | LOC102723845 |
| 220356_at | 1.116075844 | 3.621329518 | 4.129024696 | 0.000143968 | 0.005708071 | 0.872439535 | CORIN |
| 205725_at | 2.28198318 | 5.010463235 | 4.129966168 | 0.000143534 | 0.005705587 | 0.875235528 | SCGB1A1 |
| 220100_at | -1.893340583 | 6.742316522 | -4.132053276 | 0.000142576 | 0.005697701 | 0.881434876 | SLC22A11 |
| 236037_at | 1.052220635 | 4.942852089 | 4.133026532 | 0.000142132 | 0.005697701 | 0.884326227 | KIAA1244 |
| 209498_at | -1.153777936 | 6.575333957 | -4.134045912 | 0.000141667 | 0.005686983 | 0.887354934 | CEACAM1 |
| 209904_at | 1.361682814 | 4.668902862 | 4.15157915 | 0.000133912 | 0.005498522 | 0.939501097 | TNNC1 |
| 227848_at | 1.709008907 | 5.088343061 | 4.159421239 | 0.000130579 | 0.005416833 | 0.962856577 | PEBP4 |
| 209955_s_at | 1.450497378 | 6.435519025 | 4.161260764 | 0.000129808 | 0.005402701 | 0.968337943 | FAP |
| 235138_at | 1.016897189 | 7.492472511 | 4.165275231 | 0.000128143 | 0.005356427 | 0.980303904 |  |
| 213712_at | 1.008590227 | 5.350192284 | 4.166565056 | 0.000127612 | 0.005346414 | 0.984149591 | ELOVL2 |
| 224458_at | -1.050332857 | 6.99723783 | -4.176014585 | 0.000123788 | 0.00527113 | 1.012340058 | TMEM246 |
| 223587_s_at | -1.578818363 | 6.041927398 | -4.179208478 | 0.000122521 | 0.005236907 | 1.021874704 | AMN |
| 202403_s_at | 1.559390239 | 11.80757909 | 4.182085673 | 0.000121391 | 0.0052178 | 1.030466689 | COL1A2 |
| 236379_at | 1.18721259 | 5.684960497 | 4.18220631 | 0.000121344 | 0.0052178 | 1.030826996 |  |
| 226766_at | 1.193525718 | 4.46675142 | 4.196071295 | 0.000116038 | 0.005051257 | 1.072268246 | ROBO2 |
| 220301_at | 1.272455707 | 6.890971207 | 4.197625491 | 0.000115458 | 0.005038022 | 1.076917371 | CCDC102B |
| 213693_s_at | 1.26875377 | 9.206554542 | 4.207254715 | 0.000111924 | 0.004954996 | 1.105738469 | MUC1 |
| 212942_s_at | 1.540352457 | 4.677741957 | 4.210730075 | 0.000110674 | 0.004919597 | 1.116147621 | CEMIP |
| 212865_s_at | 1.786249728 | 6.888559696 | 4.21547615 | 0.00010899 | 0.004880433 | 1.130368795 | COL14A1 |
| 230493_at | 1.055796419 | 4.170537651 | 4.220325863 | 0.000107294 | 0.004840189 | 1.144907719 | SHISA2 |
| 213909_at | 1.384226167 | 6.123494739 | 4.243323485 | 9.96E-05 | 0.004638403 | 1.213950781 | LRRC15 |
| 206311_s_at | 1.470710595 | 4.467780276 | 4.245074777 | 9.90E-05 | 0.004620027 | 1.219215116 | PLA2G1B |
| 205440_s_at | -1.927973992 | 6.130799998 | -4.259649336 | 9.45E-05 | 0.004466738 | 1.263061972 | NPY1R |
| 216452_at | -1.963430885 | 5.108320411 | -4.261386706 | 9.39E-05 | 0.004446489 | 1.268293056 | TRPM3 |
| 205043_at | 1.113486312 | 4.630156457 | 4.272458824 | 9.06E-05 | 0.004353565 | 1.301651673 | CFTR |
| 1557895_at | 1.02977247 | 4.691794129 | 4.273856952 | 9.02E-05 | 0.004349125 | 1.30586664 | FLJ35934 |
| 211597_s_at | 1.579784144 | 8.33360805 | 4.275254206 | 8.98E-05 | 0.004349125 | 1.310079555 | HOPX |
| 230599_at | 1.080113167 | 7.342665466 | 4.282903347 | 8.76E-05 | 0.004272098 | 1.333153119 |  |
| 214797_s_at | -1.354248003 | 8.150691055 | -4.289059986 | 8.59E-05 | 0.004213729 | 1.35173722 | CDK18 |
| 235693_at | 1.063321759 | 4.899563062 | 4.292327081 | 8.49E-05 | 0.004184636 | 1.361603668 |  |
| 235210_s_at | 1.710972266 | 7.443671113 | 4.302653426 | 8.21E-05 | 0.004108824 | 1.392809413 | SBSPON |
| 204017_at | 1.475218111 | 9.145653227 | 4.306744319 | 8.11E-05 | 0.004080573 | 1.405180594 | KDELR3 |
| 201069_at | 1.540170073 | 9.03364308 | 4.307039512 | 8.10E-05 | 0.004080409 | 1.406073469 | MMP2 |
| 207191_s_at | 1.537515885 | 6.245455882 | 4.316531064 | 7.85E-05 | 0.003989212 | 1.434796381 | ISLR |
| 242827_x_at | 1.129165361 | 5.650087561 | 4.32285732 | 7.69E-05 | 0.003929667 | 1.45395522 |  |
| 1569040_s_at | 1.13973989 | 3.608376836 | 4.328734858 | 7.54E-05 | 0.003876763 | 1.471765559 | ANKRD36BP2 |
| 218730_s_at | 1.719653618 | 4.03769426 | 4.33085886 | 7.49E-05 | 0.003860867 | 1.47820425 | OGN |
| 232615_at | 1.209541973 | 8.392886085 | 4.332017211 | 7.46E-05 | 0.003855224 | 1.481716222 |  |
| 242059_at | 1.14131657 | 6.808818396 | 4.338988001 | 7.30E-05 | 0.003795506 | 1.502858939 |  |
| 228640_at | 1.866020651 | 5.289996288 | 4.344878941 | 7.16E-05 | 0.003769395 | 1.520737324 | PCDH7 |
| 244447_at | 1.034521589 | 7.364397569 | 4.344464258 | 7.17E-05 | 0.003769395 | 1.519478481 |  |
| 213674_x_at | 1.872800609 | 5.832833016 | 4.345855703 | 7.13E-05 | 0.003761394 | 1.523702658 | IGHD |
| 1552318_at | -1.092104146 | 6.121820486 | -4.348291588 | 7.08E-05 | 0.003752899 | 1.531098904 | GIMAP1 |
| 208109_s_at | 1.047093105 | 4.171920061 | 4.347729944 | 7.09E-05 | 0.003752899 | 1.529393394 | LINC00597 |
| 235209_at | 1.414372607 | 7.317559117 | 4.348862093 | 7.06E-05 | 0.003752899 | 1.532831415 | SBSPON |
| 235926_at | 1.096675023 | 6.694336551 | 4.350089282 | 7.04E-05 | 0.003749473 | 1.536558458 | ANAPC5 |
| 205226_at | 1.60791665 | 5.872409693 | 4.358711116 | 6.84E-05 | 0.00367153 | 1.56275557 | PDGFRL |
| 226834_at | 2.403765125 | 5.319145046 | 4.363957724 | 6.72E-05 | 0.00363634 | 1.578707536 | CLMP |
| 221730_at | 1.527772359 | 8.593714803 | 4.364785137 | 6.71E-05 | 0.003633694 | 1.581223943 | COL5A2 |
| 203021_at | 2.457875456 | 7.935821153 | 4.365768402 | 6.68E-05 | 0.003625611 | 1.584214594 | SLPI |
| 230378_at | 1.469100666 | 6.327664433 | 4.365872176 | 6.68E-05 | 0.003625611 | 1.584530243 | SCGB3A1 |
| 240452_at | 1.036731558 | 5.539282475 | 4.368834805 | 6.62E-05 | 0.003603944 | 1.593542973 | GSPT1 |
| 213496_at | 1.415794473 | 4.85086722 | 4.381201187 | 6.35E-05 | 0.003499573 | 1.631189942 | LPPR4 |
| 223121_s_at | 2.339719089 | 7.559983629 | 4.381695393 | 6.34E-05 | 0.003499573 | 1.632695345 | SFRP2 |
| 240139_at | 1.165421283 | 5.259494051 | 4.388743978 | 6.20E-05 | 0.003448412 | 1.654173523 |  |
| 211689_s_at | 1.053948118 | 3.682799678 | 4.393467557 | 6.10E-05 | 0.003433634 | 1.668574789 | TMPRSS2 |
| 236121_at | -1.010415345 | 4.336484358 | -4.412417996 | 5.74E-05 | 0.003290844 | 1.726413157 | OR51E2 |
| 209774_x_at | 1.768319147 | 8.388600869 | 4.413326378 | 5.72E-05 | 0.003284483 | 1.729188106 | CXCL2 |
| 225379_at | -1.029967341 | 7.061024219 | -4.415078227 | 5.69E-05 | 0.003275954 | 1.734540336 | MAPT |
| 239291_at | -1.699653765 | 4.417817053 | -4.417892631 | 5.63E-05 | 0.00325953 | 1.743140638 | TRPM3 |
| 226930_at | 1.79109521 | 5.367125479 | 4.420184867 | 5.59E-05 | 0.003256969 | 1.750146895 | FNDC1 |
| 203355_s_at | 1.000866908 | 4.63892819 | 4.424350224 | 5.52E-05 | 0.00324295 | 1.762882048 | PSD3 |
| 228173_at | 1.000767661 | 6.191866793 | 4.426947806 | 5.47E-05 | 0.00323232 | 1.770826287 | GNAS |
| 209016_s_at | 1.881871544 | 6.411004059 | 4.428665194 | 5.44E-05 | 0.003221076 | 1.776079617 | KRT7 |
| 238884_at | 1.190651333 | 6.929962727 | 4.432452984 | 5.37E-05 | 0.003188091 | 1.787668955 |  |
| 204149_s_at | -1.132308996 | 6.306244491 | -4.442874286 | 5.19E-05 | 0.003155031 | 1.819574614 | GSTM4 |
| 232578_at | 2.444450948 | 4.015655605 | 4.445882944 | 5.14E-05 | 0.003145838 | 1.828791316 | CLDN18 |
| 212489_at | 1.817561866 | 7.248410645 | 4.447700403 | 5.11E-05 | 0.003132275 | 1.834360088 | COL5A1 |
| 230229_at | 1.275945809 | 6.197919571 | 4.465651042 | 4.81E-05 | 0.003001149 | 1.889409113 | DLG1 |
| 225681_at | 2.001143992 | 10.0283788 | 4.471119803 | 4.73E-05 | 0.002967784 | 1.906197151 | CTHRC1 |
| 221729_at | 1.566029794 | 9.303366789 | 4.476672194 | 4.64E-05 | 0.002930709 | 1.923250014 | COL5A2 |
| 204726_at | -1.277588619 | 6.360664492 | -4.485719171 | 4.51E-05 | 0.002884404 | 1.951053073 | CDH13 |
| 202311_s_at | 2.349807311 | 7.432582394 | 4.486601444 | 4.49E-05 | 0.00287938 | 1.953765612 | COL1A1 |
| 233867_at | 1.094419147 | 6.718072173 | 4.491217669 | 4.42E-05 | 0.002849149 | 1.967961479 |  |
| 204682_at | 1.32625055 | 8.14229682 | 4.50015439 | 4.30E-05 | 0.002809587 | 1.995459579 | LTBP2 |
| 237466_s_at | 1.187165274 | 4.345966995 | 4.502909787 | 4.26E-05 | 0.002797426 | 2.003942067 | HHIP |
| 205261_at | 1.188347458 | 5.906906582 | 4.51347764 | 4.11E-05 | 0.002730514 | 2.036493401 | PGC |
| 206401_s_at | -1.273803841 | 6.657989359 | -4.523499126 | 3.98E-05 | 0.002673867 | 2.067388355 | MAPT |
| 204249_s_at | -1.060318034 | 8.866256887 | -4.531705333 | 3.87E-05 | 0.002611769 | 2.092706165 | LMO2 |
| 206201_s_at | 2.100465832 | 4.752231826 | 4.532399529 | 3.86E-05 | 0.002608986 | 2.094848687 | MEOX2 |
| 231021_at | -1.300548433 | 6.315767393 | -4.540347932 | 3.76E-05 | 0.002566498 | 2.119388844 | SLC6A19 |
| 230109_at | -1.140888316 | 6.816309888 | -4.544787963 | 3.70E-05 | 0.002543003 | 2.133104096 | PDE7B |
| 239451_at | 1.026227048 | 5.962636138 | 4.544629177 | 3.71E-05 | 0.002543003 | 2.132613521 |  |
| 205500_at | 1.095409309 | 5.569806386 | 4.561939978 | 3.50E-05 | 0.002469128 | 2.186133192 | C5 |
| 209616_s_at | 1.797717656 | 6.213635511 | 4.564420071 | 3.47E-05 | 0.002461572 | 2.19380701 | CES1 |
| 238222_at | 1.645285698 | 4.800123517 | 4.564613817 | 3.47E-05 | 0.002461572 | 2.194406559 | GKN2 |
| 204051_s_at | 2.068875654 | 6.591163497 | 4.567079038 | 3.44E-05 | 0.002459877 | 2.202035995 | SFRP4 |
| 219230_at | 2.383934467 | 6.508497897 | 4.566075652 | 3.45E-05 | 0.002459877 | 2.198930504 | TMEM100 |
| 206765_at | -1.268826194 | 7.738570992 | -4.584980197 | 3.24E-05 | 0.00236644 | 2.257482124 | KCNJ2 |
| 212488_at | 1.965526499 | 8.473287574 | 4.594854521 | 3.14E-05 | 0.002327193 | 2.288100039 | COL5A1 |
| 226695_at | 1.969620322 | 7.032331962 | 4.608029492 | 3.00E-05 | 0.00225482 | 2.328989435 | PRRX1 |
| 210078_s_at | -1.490477648 | 5.750307309 | -4.613301885 | 2.95E-05 | 0.002224708 | 2.345364419 | KCNAB1 |
| 223806_s_at | 2.130434161 | 7.558818512 | 4.615738711 | 2.93E-05 | 0.002215875 | 2.352934967 | NAPSA |
| 239487_at | 1.242160999 | 5.250627915 | 4.624365147 | 2.84E-05 | 0.002177152 | 2.379746373 |  |
| 223690_at | 1.416712792 | 7.672897028 | 4.627769108 | 2.81E-05 | 0.002161646 | 2.390330951 | LTBP2 |
| 244443_at | 1.081666958 | 4.940903568 | 4.633694149 | 2.76E-05 | 0.002135723 | 2.40876138 | LOC100507217 |
| 223218_s_at | 1.707710992 | 9.478107977 | 4.648526984 | 2.62E-05 | 0.002072256 | 2.454936815 | NFKBIZ |
| 226931_at | -1.653918633 | 7.245202952 | -4.649331309 | 2.62E-05 | 0.002069685 | 2.457442207 | TMTC1 |
| 205927_s_at | 2.001824595 | 5.904071064 | 4.649836594 | 2.61E-05 | 0.002069187 | 2.459016195 | CTSE |
| 238017_at | 2.035227108 | 3.995145111 | 4.656202916 | 2.56E-05 | 0.002040405 | 2.47885273 | SDR16C5 |
| 203060_s_at | 1.032221674 | 10.31367788 | 4.65908553 | 2.53E-05 | 0.002032702 | 2.48783765 | PAPSS2 |
| 219795_at | 1.868003751 | 3.558106099 | 4.666174418 | 2.47E-05 | 0.001990919 | 2.509941482 | SLC6A14 |
| 202450_s_at | 1.690555628 | 7.732075408 | 4.669117709 | 2.45E-05 | 0.001983092 | 2.51912237 | CTSK |
| 229978_at | -1.587392844 | 4.93960357 | -4.675688839 | 2.40E-05 | 0.001951519 | 2.539626654 | SHISA9 |
| 228481_at | 1.263504259 | 5.629707025 | 4.681490972 | 2.35E-05 | 0.00193415 | 2.55773966 |  |
| 211161_s_at | 1.818158426 | 10.7660889 | 4.683300593 | 2.33E-05 | 0.001929929 | 2.563390488 | COL3A1 |
| 205697_at | -2.352604982 | 6.267410776 | -4.687098998 | 2.31E-05 | 0.001921306 | 2.575254042 | SCGN |
| 236860_at | -1.92108974 | 6.337442414 | -4.687918059 | 2.30E-05 | 0.001918967 | 2.577812646 | NPY6R |
| 238013_at | -1.292392026 | 7.234620147 | -4.689240824 | 2.29E-05 | 0.001916333 | 2.581945058 | PLEKHA2 |
| 228865_at | 1.438089884 | 5.220616644 | 4.710964629 | 2.13E-05 | 0.001803814 | 2.649868586 | C1orf116 |
| 225645_at | 2.021727523 | 4.723382648 | 4.724893752 | 2.03E-05 | 0.001748527 | 2.693476437 | EHF |
| 203058_s_at | 1.15856375 | 9.257314625 | 4.727650574 | 2.01E-05 | 0.001743396 | 2.702112334 | PAPSS2 |
| 238317_x_at | 1.173537721 | 5.360045335 | 4.727900344 | 2.01E-05 | 0.001743396 | 2.702894836 |  |
| 238619_at | 1.030996901 | 7.077326536 | 4.727769027 | 2.01E-05 | 0.001743396 | 2.702483432 | RP11-138A9.1 |
| 200646_s_at | -1.009432718 | 7.926460358 | -4.733592978 | 1.97E-05 | 0.001732971 | 2.720732973 | NUCB1 |
| 227197_at | 1.712265934 | 5.695982105 | 4.742180904 | 1.92E-05 | 0.00170075 | 2.74765718 | ARHGEF26 |
| 232458_at | 1.424690511 | 5.005688001 | 4.742584887 | 1.91E-05 | 0.00170075 | 2.748924114 | COL3A1 |
| 244341_at | 1.361444891 | 5.538503486 | 4.746827414 | 1.89E-05 | 0.001687323 | 2.762231314 |  |
| 208131_s_at | 2.033303855 | 7.624692921 | 4.750909296 | 1.86E-05 | 0.001675812 | 2.775038348 | PTGIS |
| 228399_at | 1.056221049 | 4.7348666 | 4.753486411 | 1.84E-05 | 0.001675812 | 2.783126002 | OSR1 |
| 242068_at | 1.107397276 | 5.31369342 | 4.763853186 | 1.78E-05 | 0.00163906 | 2.81567419 |  |
| 1554474_a_at | 2.029262378 | 6.840019817 | 4.773055574 | 1.73E-05 | 0.001616023 | 2.84458605 | MOXD1 |
| 203254_s_at | -1.052571129 | 7.766712291 | -4.774213644 | 1.72E-05 | 0.001616023 | 2.848225741 | TLN1 |
| 243929_at | 1.108475282 | 3.474182817 | 4.782464288 | 1.67E-05 | 0.001599955 | 2.874164924 |  |
| 1564378_a_at | 1.025088006 | 4.369813078 | 4.783849742 | 1.67E-05 | 0.001597476 | 2.878522076 |  |
| 211062_s_at | 1.102089511 | 6.106868245 | 4.785417566 | 1.66E-05 | 0.001592087 | 2.88345326 | CPZ |
| 220512_at | 1.033310103 | 4.711667857 | 4.792932336 | 1.62E-05 | 0.001568568 | 2.907096265 | DLC1 |
| 226322_at | -1.740576352 | 7.952521678 | -4.800061665 | 1.58E-05 | 0.001545023 | 2.929537629 | TMTC1 |
| 222288_at | 2.521913538 | 7.758289958 | 4.803865731 | 1.56E-05 | 0.001530807 | 2.941516262 |  |
| 236685_at | 1.082675969 | 6.343857194 | 4.808107396 | 1.53E-05 | 0.001517934 | 2.954876432 |  |
| 227260_at | 1.125037191 | 7.085978679 | 4.812401728 | 1.51E-05 | 0.001509933 | 2.968406317 |  |
| 204363_at | 1.737203877 | 6.667852999 | 4.825023044 | 1.45E-05 | 0.001467502 | 3.008193705 | F3 |
| 222722_at | 2.348772583 | 5.001577485 | 4.827316128 | 1.44E-05 | 0.001463511 | 3.015425953 | OGN |
| 227486_at | -1.017021103 | 5.352099873 | -4.831155166 | 1.42E-05 | 0.001450842 | 3.027536466 | NT5E |
| 1556499_s_at | 1.68263588 | 11.58432279 | 4.83828351 | 1.39E-05 | 0.001421616 | 3.050031346 | COL1A1 |
| 219463_at | 1.253481781 | 5.444761659 | 4.838542711 | 1.38E-05 | 0.001421616 | 3.050849504 | LAMP5 |
| 1558783_at | 1.117359565 | 5.527860741 | 4.845108527 | 1.35E-05 | 0.001402337 | 3.071578747 |  |
| 223122_s_at | 3.15382242 | 8.238867882 | 4.846384821 | 1.35E-05 | 0.001400992 | 3.075609215 | SFRP2 |
| 228462_at | 1.48207644 | 5.3890728 | 4.852188502 | 1.32E-05 | 0.001390213 | 3.093941081 | IRX2 |
| 202855_s_at | -1.144414566 | 7.902309263 | -4.861321093 | 1.28E-05 | 0.001359233 | 3.12280162 | MIR6787 |
| 209173_at | 2.083486476 | 5.269951813 | 4.861566427 | 1.28E-05 | 0.001359233 | 3.123577149 | AGR2 |
| 241864_x_at | 1.480557438 | 5.634051004 | 4.86487802 | 1.27E-05 | 0.001349938 | 3.13404665 |  |
| 229467_at | 1.034352655 | 6.886387943 | 4.886008586 | 1.18E-05 | 0.001291931 | 3.200901725 | PCBP2 |
| 203929_s_at | -1.938441142 | 6.692278608 | -4.905548496 | 1.10E-05 | 0.001236338 | 3.262802356 | MAPT |
| 205858_at | -1.227198811 | 5.581501475 | -4.914133653 | 1.07E-05 | 0.001210753 | 3.29002281 | NGFR |
| 215039_at | 1.207336508 | 5.912611321 | 4.935637063 | 9.96E-06 | 0.001146786 | 3.358264472 | LINC01140 |
| 208250_s_at | 1.500363399 | 6.372512963 | 4.941617518 | 9.76E-06 | 0.001134669 | 3.377259225 | DMBT1 |
| 203325_s_at | 1.711009284 | 8.219247986 | 4.943846189 | 9.69E-06 | 0.001130424 | 3.38433952 | COL5A1 |
| 212624_s_at | 1.068101052 | 7.8655519 | 4.943602808 | 9.70E-06 | 0.001130424 | 3.383566272 | CHN1 |
| 239545_at | 1.131759326 | 5.121995331 | 4.963249081 | 9.07E-06 | 0.001071037 | 3.44602007 |  |
| 222020_s_at | 1.51107801 | 6.581370646 | 4.981210149 | 8.53E-06 | 0.001029728 | 3.503179272 | LOC102725271 |
| 201893_x_at | 2.892586343 | 9.943852122 | 4.984093826 | 8.45E-06 | 0.001024181 | 3.512361772 | DCN |
| 230867_at | 1.881613433 | 4.106526725 | 4.989868755 | 8.28E-06 | 0.001008694 | 3.530755434 | COL6A6 |
| 235371_at | 2.597268811 | 8.378902189 | 4.991928843 | 8.23E-06 | 0.001003871 | 3.537318462 | GXYLT2 |
| 236907_at | 1.134320571 | 6.656680447 | 4.996408099 | 8.10E-06 | 0.000999652 | 3.551591117 |  |
| 201438_at | 2.068304123 | 10.58817968 | 5.015791717 | 7.58E-06 | 0.000960503 | 3.613396353 | COL6A3 |
| 222378_at | 1.420891569 | 5.153710937 | 5.016664533 | 7.56E-06 | 0.000960503 | 3.616180925 |  |
| 238617_at | 1.720589167 | 6.121776319 | 5.018065532 | 7.52E-06 | 0.000960503 | 3.620650862 | KIF26B |
| 203131_at | 2.692580868 | 7.794600523 | 5.019443813 | 7.49E-06 | 0.000960023 | 3.625048654 | PDGFRA |
| 205654_at | 2.740523357 | 6.723311971 | 5.025522465 | 7.33E-06 | 0.000951355 | 3.644448293 | C4BPA |
| 211896_s_at | 3.119368619 | 8.602884679 | 5.032091208 | 7.17E-06 | 0.000940372 | 3.665419325 | DCN |
| 203928_x_at | -1.537574234 | 7.317969318 | -5.039565132 | 6.99E-06 | 0.000921082 | 3.689289359 | MAPT |
| 228602_at | 1.419557318 | 5.38659672 | 5.041062858 | 6.96E-06 | 0.000918593 | 3.694073928 | SGCD |
| 235733_at | 1.715700869 | 6.782980449 | 5.053247965 | 6.67E-06 | 0.000899927 | 3.733014346 | GXYLT2 |
| 236841_at | 1.146986696 | 7.229240807 | 5.091937349 | 5.84E-06 | 0.000838693 | 3.856823146 | LOC100134445 |
| 215169_at | 1.192237714 | 6.092175323 | 5.100489168 | 5.68E-06 | 0.000823117 | 3.884223402 | SLC35E2 |
| 234326_at | 1.029580751 | 4.526836142 | 5.102661483 | 5.63E-06 | 0.000822775 | 3.891185478 |  |
| 223524_s_at | 1.098796326 | 5.505193626 | 5.113190742 | 5.43E-06 | 0.000804648 | 3.924941793 | TMEM108 |
| 33322_i_at | 1.52572646 | 8.607964039 | 5.11800869 | 5.34E-06 | 0.00079843 | 3.940393944 | SFN |
| 215206_at | 1.065904743 | 5.862826776 | 5.120373325 | 5.30E-06 | 0.000794151 | 3.947979192 |  |
| 230593_at | -1.110007247 | 3.745820938 | -5.120961076 | 5.29E-06 | 0.000794151 | 3.949864713 | GRIK3 |
| 1556935_at | 1.56604623 | 5.337275041 | 5.135042738 | 5.04E-06 | 0.000766935 | 3.995055717 | RP1-142L7.8 |
| 211813_x_at | 2.623945119 | 8.681763348 | 5.134095028 | 5.06E-06 | 0.000766935 | 3.99201332 | DCN |
| 226553_at | 1.124013263 | 6.421224397 | 5.133748337 | 5.06E-06 | 0.000766935 | 3.990900386 | TMPRSS2 |
| 202489_s_at | 1.520296346 | 6.464041815 | 5.178074881 | 4.35E-06 | 0.000681247 | 4.133349513 | FXYD3 |
| 210471_s_at | -1.208481133 | 5.08703866 | -5.182120165 | 4.29E-06 | 0.000675707 | 4.14636478 | KCNAB1 |
| 201744_s_at | 3.634324661 | 9.582436225 | 5.214220272 | 3.84E-06 | 0.000640078 | 4.249731449 | LUM |
| 205569_at | 2.466353158 | 7.410780321 | 5.216690575 | 3.81E-06 | 0.000640078 | 4.25769256 | LAMP3 |
| 223217_s_at | 1.764349125 | 8.959281242 | 5.225139086 | 3.70E-06 | 0.000629892 | 4.284926624 | NFKBIZ |
| 232500_at | 1.152442926 | 5.762753863 | 5.236566922 | 3.56E-06 | 0.000609362 | 4.321781324 | RALGAPA2 |
| 243963_at | 1.431910238 | 6.512219316 | 5.246916411 | 3.43E-06 | 0.000593583 | 4.355174756 |  |
| 216264_s_at | -1.027811607 | 8.533685448 | -5.253346224 | 3.36E-06 | 0.000582407 | 4.375928826 | LAMB2 |
| 231315_at | 2.029498679 | 3.914823007 | 5.272612047 | 3.14E-06 | 0.000550184 | 4.43815009 |  |
| 243305_at | 1.004979869 | 6.193782109 | 5.275700535 | 3.11E-06 | 0.000547861 | 4.448129604 |  |
| 236862_at | 1.088888193 | 3.972774212 | 5.276688739 | 3.10E-06 | 0.000547762 | 4.451322969 | AJ420595 |
| 209708_at | 2.220931206 | 6.697623184 | 5.287370418 | 2.98E-06 | 0.000533099 | 4.48584932 | MOXD1 |
| 218813_s_at | -1.011560543 | 5.43472637 | -5.293536393 | 2.92E-06 | 0.000523807 | 4.50578678 | SH3GLB2 |
| 229574_at | 1.245303349 | 6.80439046 | 5.307394254 | 2.78E-06 | 0.000515647 | 4.550614719 | TRA2A |
| 242688_at | 1.187437078 | 5.955533099 | 5.32183492 | 2.65E-06 | 0.000501255 | 4.597355666 |  |
| 91826_at | 1.041688341 | 6.146799261 | 5.319731467 | 2.67E-06 | 0.000501255 | 4.590545552 | EPS8L1 |
| 204712_at | 2.643877889 | 4.551250069 | 5.324173978 | 2.63E-06 | 0.000500491 | 4.604929266 | WIF1 |
| 243683_at | 1.365097822 | 5.166795054 | 5.341292156 | 2.48E-06 | 0.00048007 | 4.660378072 | MORF4L2 |
| 229177_at | 1.794626656 | 5.365217255 | 5.365953872 | 2.27E-06 | 0.000450355 | 4.740329114 | C16orf89 |
| 229554_at | 2.612506698 | 6.52372329 | 5.369060027 | 2.25E-06 | 0.000447155 | 4.750404541 | LUM |
| 213593_s_at | 1.33215925 | 8.000927962 | 5.378917555 | 2.17E-06 | 0.000435303 | 4.782387503 | TRA2A |
| 233011_at | 1.546089101 | 5.039896453 | 5.381257454 | 2.16E-06 | 0.000433375 | 4.78998116 | ANXA1 |
| 235094_at | 1.590410099 | 6.236361466 | 5.393549753 | 2.07E-06 | 0.000419924 | 4.829884539 |  |
| 204550_x_at | -1.046365414 | 7.637082714 | -5.398237193 | 2.03E-06 | 0.000417529 | 4.845105909 | GSTM1 |
| 209170_s_at | 2.00694985 | 5.60052607 | 5.428777882 | 1.83E-06 | 0.000387657 | 4.944345532 | GPM6B |
| 205549_at | 1.510642724 | 4.686089125 | 5.435020764 | 1.79E-06 | 0.000383601 | 4.964645148 | PCP4 |
| 241425_at | 1.08152204 | 6.267531334 | 5.443141425 | 1.74E-06 | 0.000380391 | 4.991057547 | NUPL1 |
| 238534_at | 1.162637634 | 6.281894331 | 5.444525749 | 1.73E-06 | 0.00038022 | 4.99556083 | LRRFIP1 |
| 206814_at | -1.052945913 | 5.924720025 | -5.452545332 | 1.68E-06 | 0.000372635 | 5.021653391 | NGF |
| 219087_at | 2.351159945 | 8.470690637 | 5.456054584 | 1.66E-06 | 0.000371123 | 5.033073471 | ASPN |
| 204052_s_at | 2.448738166 | 5.062464435 | 5.460813902 | 1.64E-06 | 0.000366531 | 5.048563899 | SFRP4 |
| 230703_at | 1.133076758 | 5.992452836 | 5.475300286 | 1.56E-06 | 0.000358806 | 5.095729595 |  |
| 65133_i_at | -1.108844565 | 5.723957186 | -5.48948773 | 1.48E-06 | 0.000350416 | 5.14194508 | INO80B |
| 209167_at | 1.902275678 | 5.288714706 | 5.494960651 | 1.45E-06 | 0.000348888 | 5.159779105 | GPM6B |
| 202995_s_at | 2.41132927 | 6.498534071 | 5.498013087 | 1.44E-06 | 0.0003477 | 5.1697272 | FBLN1 |
| 223657_at | -1.264452043 | 6.338748362 | -5.562812037 | 1.15E-06 | 0.000291638 | 5.381148808 | FAM167B |
| 202709_at | 1.671198242 | 7.975053136 | 5.57198948 | 1.11E-06 | 0.000286449 | 5.411127915 | FMOD |
| 228875_at | 1.663148444 | 7.032693494 | 5.613085708 | 9.62E-07 | 0.000254747 | 5.545476471 | FAM162B |
| 215104_at | -1.26363758 | 5.601096781 | -5.620700259 | 9.37E-07 | 0.000251141 | 5.570387467 | NRIP2 |
| 217287_s_at | 1.166821116 | 4.551181791 | 5.629459696 | 9.09E-07 | 0.00024717 | 5.599050786 | TRPC6 |
| 244753_at | 1.220124064 | 6.605238017 | 5.652790793 | 8.38E-07 | 0.000233193 | 5.675431699 |  |
| 230609_at | 1.279501551 | 5.129076081 | 5.672951744 | 7.81E-07 | 0.000223462 | 5.741474379 | CLINT1 |
| 226960_at | 2.182568618 | 5.691354661 | 5.700529738 | 7.09E-07 | 0.000210628 | 5.831871983 | CXCL17 |
| 221911_at | 1.960952157 | 7.080975915 | 5.707329916 | 6.92E-07 | 0.000206797 | 5.854172324 | ETV1 |
| 210906_x_at | 2.544828759 | 4.077340022 | 5.717867502 | 6.67E-07 | 0.000204542 | 5.888736774 | AQP4 |
| 201787_at | 1.601433346 | 6.171740039 | 5.728367918 | 6.43E-07 | 0.000199522 | 5.923188537 | FBLN1 |
| 202016_at | 2.057098463 | 8.223018998 | 5.752252445 | 5.91E-07 | 0.000187991 | 6.001587062 | MEST |
| 209335_at | 3.375337033 | 7.657420554 | 5.756580489 | 5.82E-07 | 0.00018734 | 6.015798333 | DCN |
| 1556336_at | 1.247648966 | 6.962593518 | 5.759532179 | 5.76E-07 | 0.000186509 | 6.025491153 | LOC101928747 |
| 241722_x_at | 1.272708939 | 6.636337649 | 5.769271392 | 5.57E-07 | 0.000183507 | 6.057477823 |  |
| 243561_at | 1.294228452 | 6.631459349 | 5.776177021 | 5.44E-07 | 0.000181301 | 6.080162569 |  |
| 204345_at | 1.577955413 | 7.029542042 | 5.796559008 | 5.06E-07 | 0.000178668 | 6.147137897 | COL16A1 |
| 206367_at | -3.527133698 | 5.973857235 | -5.792741164 | 5.13E-07 | 0.000178668 | 6.134590057 | REN |
| 209596_at | 2.390551074 | 8.612465783 | 5.798388674 | 5.03E-07 | 0.000178668 | 6.153151719 | MXRA5 |
| 227159_at | -1.192713918 | 7.607185116 | -5.792576352 | 5.13E-07 | 0.000178668 | 6.134048405 | GHDC |
| 231108_at | 1.181551835 | 6.116879123 | 5.788392577 | 5.21E-07 | 0.000178668 | 6.12029919 | FUS |
| 33323_r_at | 2.31698651 | 7.875328299 | 5.792864678 | 5.13E-07 | 0.000178668 | 6.134995984 | SFN |
| 211024_s_at | 2.252110465 | 5.021129964 | 5.803542063 | 4.94E-07 | 0.000177713 | 6.17009142 | NKX2-1 |
| 204124_at | 2.19907317 | 7.690813647 | 5.807222301 | 4.88E-07 | 0.000176595 | 6.182189927 | SLC34A2 |
| 204418_x_at | -1.125694798 | 8.339280873 | -5.859418835 | 4.06E-07 | 0.000162133 | 6.353886258 | GSTM2 |
| 210096_at | 3.265573319 | 5.139219564 | 5.860393937 | 4.05E-07 | 0.000162133 | 6.357095574 | CYP4B1 |
| 223678_s_at | 3.787415453 | 5.009649031 | 5.857206101 | 4.09E-07 | 0.000162133 | 6.34660381 | SFTPA1 |
| 203108_at | 2.477602903 | 6.852165549 | 5.891236534 | 3.63E-07 | 0.000156322 | 6.458639065 | GPRC5A |
| 203757_s_at | 2.779544455 | 4.813393647 | 5.8939547 | 3.60E-07 | 0.000156065 | 6.467591075 | CEACAM6 |
| 205648_at | 1.619388488 | 4.831488672 | 5.939787545 | 3.06E-07 | 0.000136074 | 6.618605878 | WNT2 |
| 218820_at | 1.894267123 | 6.628326872 | 5.948559599 | 2.97E-07 | 0.000133021 | 6.64752327 | C14orf132 |
| 204424_s_at | 2.157493813 | 5.572112753 | 5.973293398 | 2.72E-07 | 0.000123964 | 6.729082714 | LMO3 |
| 209763_at | 2.692562882 | 6.16617291 | 5.991160737 | 2.55E-07 | 0.00011838 | 6.788021035 | CHRDL1 |
| 215454_x_at | 2.127273067 | 6.603533993 | 5.996802627 | 2.50E-07 | 0.000117337 | 6.806635264 | SFTPC |
| 242500_at | 1.376884451 | 4.745740651 | 6.00275206 | 2.45E-07 | 0.00011661 | 6.826265968 |  |
| 231993_at | 1.783717196 | 6.157559553 | 6.008328212 | 2.41E-07 | 0.000116341 | 6.844666657 | ITGBL1 |
| 226522_at | 1.259647842 | 6.624410559 | 6.023705758 | 2.28E-07 | 0.000113237 | 6.895419043 | PODN |
| 210068_s_at | 2.61447109 | 4.748973537 | 6.037290122 | 2.17E-07 | 0.000111054 | 6.94026291 | AQP4 |
| 214135_at | 2.914450642 | 7.076074521 | 6.033938944 | 2.20E-07 | 0.000111054 | 6.929199377 | CLDN18 |
| 219476_at | 2.771438046 | 5.774372101 | 6.058417372 | 2.02E-07 | 0.000110098 | 7.0100244 | C1orf116 |
| 238909_at | 1.378660922 | 7.141286743 | 6.062895171 | 1.98E-07 | 0.00010959 | 7.024812603 | S100A10 |
| 201340_s_at | 1.23420929 | 7.613109519 | 6.133608553 | 1.55E-07 | 9.09E-05 | 7.258462318 | ENC1 |
| 206528_at | 1.313996537 | 5.406988917 | 6.178787719 | 1.32E-07 | 8.13E-05 | 7.407844362 | TRPC6 |
| 204275_at | -1.050594227 | 6.67934516 | -6.19263264 | 1.26E-07 | 7.89E-05 | 7.453635843 | CAPN15 |
| 205111_s_at | 1.383589449 | 6.44924846 | 6.211746686 | 1.17E-07 | 7.46E-05 | 7.51686481 | PLCE1 |
| 205941_s_at | 2.197569934 | 6.005891235 | 6.248821677 | 1.03E-07 | 6.70E-05 | 7.639539231 | COL10A1 |
| 244056_at | 3.309920823 | 5.086309025 | 6.27215317 | 9.48E-08 | 6.40E-05 | 7.716758012 | SFTA2 |
| 206091_at | 1.465246815 | 3.510505166 | 6.306023631 | 8.41E-08 | 5.90E-05 | 7.828880288 | MATN3 |
| 226228_at | 3.807698994 | 5.910516993 | 6.340311576 | 7.45E-08 | 5.36E-05 | 7.942409316 | AQP4 |
| 228218_at | 1.717745091 | 4.261008096 | 6.357840102 | 7.00E-08 | 5.11E-05 | 8.0004555 | LSAMP |
| 228979_at | 3.442495789 | 4.327037002 | 6.368970526 | 6.73E-08 | 4.97E-05 | 8.037316836 | SFTA3 |
| 216840_s_at | 1.64567296 | 5.799985949 | 6.375170541 | 6.59E-08 | 4.93E-05 | 8.057850649 | LAMA2 |
| 205422_s_at | 2.63659943 | 6.910287114 | 6.407468867 | 5.88E-08 | 4.53E-05 | 8.164828059 | ITGBL1 |
| 212444_at | 2.703368342 | 6.567299392 | 6.431699088 | 5.39E-08 | 4.40E-05 | 8.245090804 | GPRC5A |
| 205116_at | 1.406191218 | 5.627468191 | 6.451955088 | 5.02E-08 | 4.33E-05 | 8.312193289 | LAMA2 |
| 242064_at | 1.070107463 | 4.624389453 | 6.441163282 | 5.22E-08 | 4.33E-05 | 8.276442596 | SDK2 |
| 217428_s_at | 3.11714027 | 5.03572981 | 6.48443171 | 4.48E-08 | 4.01E-05 | 8.419785632 | COL10A1 |
| 236577_at | 1.239984829 | 3.938186075 | 6.495611987 | 4.30E-08 | 3.99E-05 | 8.456826304 | PRDM6 |
| 1557080_s_at | 2.28879144 | 6.67002406 | 6.536466866 | 3.72E-08 | 3.70E-05 | 8.592183264 | ITGBL1 |
| 240715_at | 2.13328924 | 6.200405984 | 6.620042784 | 2.77E-08 | 2.97E-05 | 8.869075508 | TBX5 |
| 214354_x_at | 2.660571795 | 7.697282048 | 6.636016751 | 2.62E-08 | 2.86E-05 | 8.921994413 | SFTPB |
| 233947_s_at | 1.495786659 | 3.927789558 | 6.652974441 | 2.46E-08 | 2.75E-05 | 8.97816996 | TBX5-AS1 |
| 211657_at | 3.069888966 | 5.707090169 | 6.719287095 | 1.95E-08 | 2.43E-05 | 9.197813313 | CEACAM6 |
| 203417_at | 1.752768501 | 7.005707806 | 6.761629239 | 1.68E-08 | 2.29E-05 | 9.338027983 | MFAP2 |
| 230130_at | 2.377317639 | 6.619133314 | 6.827883828 | 1.33E-08 | 2.07E-05 | 9.557360334 | SLIT2 |
| 228241_at | 3.653477169 | 4.598283262 | 6.841165198 | 1.27E-08 | 2.04E-05 | 9.60131602 | AGR3 |
| 209897_s_at | 2.095998049 | 7.608144361 | 6.87375646 | 1.13E-08 | 1.87E-05 | 9.709160693 | SLIT2 |
| 213519_s_at | 1.705213593 | 6.098855417 | 6.963280257 | 8.22E-09 | 1.40E-05 | 10.00524145 | LAMA2 |
| 214927_at | 2.404961296 | 7.076789929 | 7.076076789 | 5.52E-09 | 1.08E-05 | 10.37790536 | ITGBL1 |
| 214199_at | 3.454941813 | 6.606157543 | 7.087767772 | 5.29E-09 | 1.07E-05 | 10.41650241 | SFTPD |
| 202994_s_at | 2.648595987 | 7.629887816 | 7.103893209 | 5.00E-09 | 1.05E-05 | 10.46973009 | FBLN1 |
| 205982_x_at | 4.184009567 | 7.37959885 | 7.106733761 | 4.95E-09 | 1.05E-05 | 10.47910518 | SFTPC |
| 219580_s_at | 2.309616491 | 4.562706161 | 7.135184612 | 4.48E-09 | 1.02E-05 | 10.57298611 | TMC5 |
| 228850_s_at | 1.961762988 | 6.222884077 | 7.153437071 | 4.20E-09 | 9.98E-06 | 10.63319564 | SLIT2 |
| 228782_at | 3.717940257 | 5.651554305 | 7.250713206 | 2.98E-09 | 7.75E-06 | 10.95381053 | SCGB3A2 |
| 211735_x_at | 4.330357861 | 7.786772163 | 7.265689168 | 2.82E-09 | 7.72E-06 | 11.00312733 | SFTPC |
| 226997_at | 1.807748627 | 6.332490427 | 7.408814132 | 1.71E-09 | 5.18E-06 | 11.47381005 | ADAMTS12 |
| 214387_x_at | 4.559403154 | 7.916448735 | 7.681367273 | 6.54E-10 | 2.24E-06 | 12.36646362 | SFTPC |
| 230733_at | 1.57934071 | 6.350777283 | 7.753366824 | 5.08E-10 | 1.85E-06 | 12.60135808 |  |
| 213936_x_at | 2.815206051 | 7.631161807 | 8.002846546 | 2.13E-10 | 8.94E-07 | 13.4119099 | SFTPB |
| 38691_s_at | 4.671623885 | 8.381708528 | 8.138626195 | 1.33E-10 | 6.04E-07 | 13.85067649 | SFTPC |
| 206377_at | 2.20713027 | 5.625021553 | 8.505780195 | 3.72E-11 | 1.85E-07 | 15.02776341 | FOXF2 |
| 240304_s_at | 3.944413727 | 5.172567012 | 9.763838641 | 5.30E-13 | 2.90E-09 | 18.93829161 | LOC102724257 |
| 219454_at | 4.01497204 | 6.147508558 | 9.877573775 | 3.64E-13 | 2.21E-09 | 19.28135966 | EGFL6 |
| 218835_at | 6.332694713 | 7.237008762 | 10.2050276 | 1.24E-13 | 9.33E-10 | 20.25869527 | SFTPA1 |
| 228504_at | 3.862195901 | 5.037007439 | 10.17632097 | 1.37E-13 | 9.33E-10 | 20.1736399 | SCN7A |
| 37004_at | 6.006962931 | 7.09874144 | 11.74737038 | 9.51E-16 | 2.60E-11 | 24.6463241 | SFTPB |
| 209810_at | 5.511899581 | 7.96786851 | 12.40548799 | 1.30E-16 | 7.13E-12 | 26.40778748 | SFTPB |

**Supplementary Table S2** Genes differentially expressed between the primary and metastatic ccRCC tissues in GSE85258

| Probe | logFC | AveExpr | t | P.Value | adj.P.Val | B | Gene |
| --- | --- | --- | --- | --- | --- | --- | --- |
| 205357_s_at | -1.1033 | 5.58302 | -2.0456 | 0.04998 | 0.59881 | -3.9494 | AGTR1 |
| 201890_at | 1.08457 | 9.11958 | 2.04722 | 0.04981 | 0.59881 | -3.9467 | RRM2 |
| 206872_at | -1.2944 | 6.11121 | -2.0488 | 0.04965 | 0.59881 | -3.9441 | SLC17A1 |
| 205421_at | 1.15814 | 5.08883 | 2.05076 | 0.04944 | 0.59881 | -3.9409 | SLC22A3 |
| 223484_at | 1.15506 | 7.71361 | 2.06035 | 0.04846 | 0.5955 | -3.925 | C15orf48 |
| 234973_at | 1.12514 | 6.11205 | 2.06844 | 0.04764 | 0.59237 | -3.9116 | SLC38A5 |
| 202376_at | 1.0022 | 6.25688 | 2.06873 | 0.04761 | 0.59237 | -3.9111 | SERPINA3 |
| 226834_at | 1.35851 | 5.0554 | 2.07137 | 0.04734 | 0.59153 | -3.9067 | CLMP |
| 212592_at | 1.49175 | 8.02988 | 2.07311 | 0.04717 | 0.59153 | -3.9039 | IGJ |
| 213933_at | -1.4115 | 6.40552 | -2.0736 | 0.04712 | 0.59153 | -3.903 | PTGER3 |
| 207981_s_at | -1.2165 | 5.58754 | -2.0787 | 0.04662 | 0.59153 | -3.8945 | ESRRG |
| 231426_at | -1.5643 | 6.05808 | -2.0861 | 0.04589 | 0.59016 | -3.8821 |  |
| 242536_at | -1.2297 | 4.87879 | -2.0999 | 0.04457 | 0.58702 | -3.8591 |  |
| 227506_at | -1.4814 | 7.21846 | -2.1054 | 0.04405 | 0.58599 | -3.8498 | SLC16A9 |
| 239262_at | -1.0638 | 6.88405 | -2.1091 | 0.04371 | 0.58461 | -3.8437 |  |
| 218353_at | -1.1657 | 10.2955 | -2.125 | 0.04225 | 0.58041 | -3.8169 | RGS5 |
| 226086_at | 1.52625 | 8.15564 | 2.14509 | 0.04047 | 0.57533 | -3.7827 | SYT13 |
| 220518_at | -1.057 | 4.65 | -2.1473 | 0.04028 | 0.57493 | -3.7789 | ABI3BP |
| 205207_at | 1.13133 | 6.28617 | 2.14942 | 0.0401 | 0.57493 | -3.7753 | IL6 |
| 206522_at | -1.7681 | 7.1823 | -2.1524 | 0.03984 | 0.57493 | -3.7703 | MGAM |
| 212805_at | -1.1752 | 8.23962 | -2.1563 | 0.03951 | 0.57396 | -3.7636 | PRUNE2 |
| 231154_x_at | -1.1688 | 6.50493 | -2.157 | 0.03945 | 0.57356 | -3.7623 | TINAG |
| 204934_s_at | -1.0214 | 7.6423 | -2.1652 | 0.03876 | 0.57043 | -3.7483 | HPN |
| 223782_s_at | -1.0991 | 5.35038 | -2.1659 | 0.0387 | 0.57043 | -3.7471 | TINAG |
| 210839_s_at | -1.0174 | 8.88627 | -2.1705 | 0.03831 | 0.57043 | -3.7392 | ENPP2 |
| 202628_s_at | 1.16609 | 9.55256 | 2.18059 | 0.03749 | 0.57036 | -3.7219 | SERPINE1 |
| 214836_x_at | 1.29195 | 8.97298 | 2.18134 | 0.03743 | 0.57036 | -3.7206 | IGK |
| 205978_at | -1.0431 | 5.20348 | -2.1814 | 0.03742 | 0.57036 | -3.7204 | KL |
| 214461_at | 2.25205 | 6.38906 | 2.19291 | 0.0365 | 0.57036 | -3.7006 | LBP |
| 203946_s_at | 1.68208 | 6.80625 | 2.19312 | 0.03649 | 0.57036 | -3.7002 | ARG2 |
| 221019_s_at | 1.51733 | 6.94734 | 2.19462 | 0.03637 | 0.57036 | -3.6976 | COLEC12 |
| 219612_s_at | 2.91746 | 7.17857 | 2.2 | 0.03594 | 0.56841 | -3.6883 | FGG |
| 209070_s_at | -1.1128 | 9.1495 | -2.2002 | 0.03592 | 0.56841 | -3.6879 | RGS5 |
| 202267_at | 1.24339 | 6.8512 | 2.20124 | 0.03585 | 0.56841 | -3.6862 | LAMC2 |
| 211645_x_at | 1.53392 | 6.21558 | 2.20131 | 0.03584 | 0.56841 | -3.686 | IGKV1-17 |
| 227180_at | -1.3239 | 7.27814 | -2.2055 | 0.03551 | 0.56785 | -3.6787 | ELOVL7 |
| 206030_at | -1.3867 | 7.96515 | -2.2126 | 0.03497 | 0.5665 | -3.6664 | ASPA |
| 227794_at | -1.6271 | 6.44228 | -2.2137 | 0.03489 | 0.56595 | -3.6646 | GLYATL1 |
| 209642_at | 1.0843 | 5.51548 | 2.22152 | 0.0343 | 0.56305 | -3.6509 | BUB1 |
| 206893_at | -1.103 | 5.80704 | -2.225 | 0.03404 | 0.56263 | -3.6449 | SALL1 |
| 1555800_at | 1.06031 | 4.99102 | 2.2279 | 0.03382 | 0.56174 | -3.6398 | ZNF385B |
| 206448_at | 1.02355 | 4.93327 | 2.23385 | 0.03339 | 0.55924 | -3.6294 | ZNF365 |
| 222608_s_at | 1.47522 | 7.00005 | 2.2399 | 0.03295 | 0.55867 | -3.6187 | ANLN |
| 201195_s_at | 1.13184 | 8.827 | 2.24404 | 0.03265 | 0.55851 | -3.6115 | SLC7A5 |
| 216401_x_at | 1.2399 | 6.51817 | 2.24846 | 0.03233 | 0.55748 | -3.6037 | IGKV1-37 |
| 219836_at | 1.16362 | 5.8527 | 2.25092 | 0.03216 | 0.55606 | -3.5994 | ZBED2 |
| 221671_x_at | 1.29177 | 11.3016 | 2.25321 | 0.032 | 0.55584 | -3.5953 | IGK |
| 209071_s_at | -1.0281 | 11.0794 | -2.2555 | 0.03184 | 0.55528 | -3.5914 | RGS5 |
| 224795_x_at | 1.23527 | 11.4539 | 2.2556 | 0.03183 | 0.55527 | -3.5911 | IGK |
| 228739_at | -1.6124 | 6.8253 | -2.2591 | 0.03158 | 0.55445 | -3.5849 | CYS1 |
| 219493_at | 1.01204 | 6.57149 | 2.25993 | 0.03153 | 0.55445 | -3.5835 | SHCBP1 |
| 229019_at | 1.04293 | 6.79281 | 2.26266 | 0.03134 | 0.5528 | -3.5787 | ZNF385B |
| 205380_at | -2.0803 | 9.25911 | -2.264 | 0.03125 | 0.55199 | -3.5763 | PDZK1 |
| 208470_s_at | 1.95315 | 7.17184 | 2.26416 | 0.03123 | 0.55199 | -3.576 | HP |
| 229229_at | -1.4928 | 6.89594 | -2.2655 | 0.03114 | 0.55199 | -3.5736 | AGXT2 |
| 219686_at | -1.033 | 7.30451 | -2.2726 | 0.03066 | 0.55068 | -3.5611 | STK32B |
| 209773_s_at | 1.18022 | 7.93084 | 2.27361 | 0.03059 | 0.55068 | -3.5593 | RRM2 |
| 229147_at | -1.2601 | 8.17558 | -2.2823 | 0.03 | 0.54834 | -3.5438 | RASSF6 |
| 221651_x_at | 1.31369 | 11.269 | 2.28348 | 0.02993 | 0.5483 | -3.5418 | IGK |
| 230432_at | -1.33 | 7.06575 | -2.2885 | 0.0296 | 0.54652 | -3.5329 | LOC100422737 |
| 206561_s_at | 1.42854 | 5.09117 | 2.28869 | 0.02959 | 0.54652 | -3.5325 | AKR1B10 |
| 214038_at | 1.06167 | 5.8563 | 2.29719 | 0.02903 | 0.54347 | -3.5174 | CCL8 |
| 224179_s_at | -1.0381 | 5.68318 | -2.2973 | 0.02902 | 0.54347 | -3.5171 | MIOX |
| 202391_at | 1.16197 | 9.34904 | 2.30366 | 0.02862 | 0.54178 | -3.5058 | BASP1 |
| 205799_s_at | -2.2693 | 9.62796 | -2.3051 | 0.02853 | 0.54161 | -3.5033 | SLC3A1 |
| 33322_i_at | 1.25034 | 10.7021 | 2.30576 | 0.02849 | 0.54161 | -3.5021 | SFN |
| 225242_s_at | 1.21584 | 8.23556 | 2.31607 | 0.02784 | 0.53996 | -3.4836 | CCDC80 |
| 208383_s_at | -1.6498 | 5.56686 | -2.323 | 0.02741 | 0.53673 | -3.4711 | PCK1 |
| 204298_s_at | 1.53567 | 7.79408 | 2.32351 | 0.02738 | 0.53673 | -3.4702 | LOX |
| 213425_at | 1.29645 | 5.69578 | 2.32456 | 0.02732 | 0.53673 | -3.4683 | WNT5A |
| 209309_at | -1.3138 | 6.02738 | -2.3377 | 0.02653 | 0.53516 | -3.4446 | AZGP1 |
| 201291_s_at | 1.11981 | 7.40272 | 2.34746 | 0.02595 | 0.5313 | -3.427 | TOP2A |
| 214669_x_at | 1.35402 | 9.14724 | 2.35002 | 0.0258 | 0.5313 | -3.4224 | IGKC |
| 208083_s_at | 1.04933 | 4.4685 | 2.35015 | 0.0258 | 0.5313 | -3.4222 | ITGB6 |
| 222890_at | 1.24313 | 6.04571 | 2.35222 | 0.02568 | 0.5313 | -3.4184 | CCDC113 |
| 225681_at | 1.17687 | 10.15 | 2.35508 | 0.02551 | 0.5293 | -3.4132 | CTHRC1 |
| 227826_s_at | -1.03 | 5.15289 | -2.359 | 0.02529 | 0.52846 | -3.4062 |  |
| 1558930_at | 1.04652 | 5.52695 | 2.36527 | 0.02494 | 0.5273 | -3.3947 | LINC00460 |
| 1557285_at | 1.17365 | 4.06588 | 2.36571 | 0.02491 | 0.5273 | -3.3939 | AREG |
| 207298_at | -2.7198 | 8.32341 | -2.3734 | 0.02448 | 0.52535 | -3.38 | SLC17A3 |
| 210387_at | -1.2412 | 6.56123 | -2.3809 | 0.02407 | 0.52344 | -3.3662 | HIST1H2BG |
| 205286_at | 1.24684 | 5.50297 | 2.3937 | 0.02339 | 0.52071 | -3.3428 | TFAP2C |
| 233059_at | -1.3629 | 5.57133 | -2.3939 | 0.02337 | 0.52071 | -3.3424 | KCNJ3 |
| 244035_at | -1.021 | 6.96775 | -2.4005 | 0.02303 | 0.51862 | -3.3303 | RP11-28F1.2 |
| 203355_s_at | 1.19111 | 6.90629 | 2.4019 | 0.02295 | 0.51862 | -3.3278 | PSD3 |
| 1562094_at | 1.22637 | 5.03132 | 2.40402 | 0.02284 | 0.51862 | -3.3239 |  |
| 215176_x_at | 1.60276 | 7.43119 | 2.40672 | 0.0227 | 0.51862 | -3.3189 | IGK |
| 205363_at | -2.3111 | 7.60828 | -2.4152 | 0.02227 | 0.51596 | -3.3033 | BBOX1 |
| 205478_at | 1.07385 | 5.53342 | 2.42331 | 0.02186 | 0.51248 | -3.2884 | PPP1R1A |
| 211652_s_at | 1.5286 | 6.41496 | 2.42785 | 0.02164 | 0.5121 | -3.28 | LBP |
| 203929_s_at | -1.1532 | 6.88398 | -2.4281 | 0.02163 | 0.5121 | -3.2796 | MAPT |
| 228988_at | -1.3091 | 6.66718 | -2.4395 | 0.02107 | 0.51002 | -3.2584 | ZNF711 |
| 205666_at | -1.3059 | 6.73363 | -2.4397 | 0.02106 | 0.51002 | -3.258 | FMO1 |
| 210078_s_at | -1.3232 | 6.10537 | -2.4438 | 0.02087 | 0.50886 | -3.2505 | KCNAB1 |
| 225895_at | -1.1464 | 6.53034 | -2.4494 | 0.0206 | 0.50598 | -3.24 | SYNPO2 |
| 204962_s_at | 1.07075 | 6.38887 | 2.45008 | 0.02057 | 0.50598 | -3.2388 | CENPA |
| 218542_at | 1.34046 | 6.44535 | 2.45353 | 0.02041 | 0.50366 | -3.2324 | CEP55 |
| 215783_s_at | 1.01505 | 6.16912 | 2.45489 | 0.02034 | 0.50282 | -3.2298 | ALPL |
| 209031_at | 1.06704 | 8.36933 | 2.45808 | 0.0202 | 0.50269 | -3.2239 | CADM1 |
| 205768_s_at | -1.6568 | 6.80747 | -2.459 | 0.02015 | 0.50269 | -3.2223 | SLC27A2 |
| 206157_at | 1.36066 | 6.09583 | 2.46798 | 0.01974 | 0.5007 | -3.2054 | PTX3 |
| 221886_at | 1.04436 | 5.60202 | 2.46993 | 0.01965 | 0.50068 | -3.2018 | DENND2A |
| 1552390_a_at | -1.1289 | 5.17442 | -2.4708 | 0.01962 | 0.50045 | -3.2002 | ERICH5 |
| 227955_s_at | 1.01095 | 8.05655 | 2.47115 | 0.0196 | 0.50026 | -3.1995 | EFNA5 |
| 226388_at | -1.0807 | 9.06653 | -2.4745 | 0.01945 | 0.49899 | -3.1932 | TCEA3 |
| 205990_s_at | 1.29312 | 6.59759 | 2.47945 | 0.01923 | 0.49899 | -3.184 | WNT5A |
| 205769_at | -1.6371 | 6.80771 | -2.4904 | 0.01875 | 0.49702 | -3.1635 | SLC27A2 |
| 220084_at | -1.2759 | 5.71792 | -2.492 | 0.01868 | 0.49675 | -3.1605 | C14orf105 |
| 203980_at | 1.00766 | 5.57202 | 2.49687 | 0.01847 | 0.49607 | -3.1513 | FABP4 |
| 235548_at | 1.55294 | 6.15932 | 2.50107 | 0.01829 | 0.49514 | -3.1434 | APCDD1L |
| 203928_x_at | -1.0234 | 7.1775 | -2.5138 | 0.01776 | 0.49184 | -3.1194 | MAPT |
| 206697_s_at | 1.97065 | 7.61258 | 2.52081 | 0.01748 | 0.49144 | -3.1061 | HP |
| 227449_at | -1.0778 | 6.47318 | -2.5241 | 0.01734 | 0.49099 | -3.0998 | EPHA4 |
| 202363_at | 1.70994 | 7.66401 | 2.53041 | 0.01709 | 0.48822 | -3.088 | SPOCK1 |
| 1552455_at | -1.3228 | 6.6234 | -2.531 | 0.01707 | 0.48806 | -3.0868 | PRUNE2 |
| 240242_at | 1.2144 | 5.96964 | 2.53121 | 0.01706 | 0.48806 | -3.0864 |  |
| 203868_s_at | -1.0532 | 11.4265 | -2.5382 | 0.01678 | 0.4848 | -3.0732 | VCAM1 |
| 203685_at | -1.1828 | 8.39962 | -2.5451 | 0.01652 | 0.48304 | -3.0601 | BCL2 |
| 232210_at | -1.106 | 8.49573 | -2.5489 | 0.01637 | 0.48299 | -3.0529 |  |
| 213285_at | 1.23385 | 6.25246 | 2.54914 | 0.01636 | 0.48299 | -3.0524 | TMEM30B |
| 227929_at | -1.2688 | 6.95853 | -2.5502 | 0.01632 | 0.48299 | -3.0503 | LIN7A |
| 205442_at | -1.0123 | 6.60691 | -2.5557 | 0.01612 | 0.48044 | -3.04 | LOC101928198 |
| 222943_at | -1.8399 | 6.28922 | -2.5572 | 0.01606 | 0.48005 | -3.037 | GBA3 |
| 207317_s_at | -1.0474 | 6.10517 | -2.5831 | 0.01511 | 0.46949 | -2.9874 | CASQ2 |
| 215446_s_at | 1.37621 | 10.4514 | 2.59048 | 0.01485 | 0.46949 | -2.9733 | LOX |
| 1557618_at | -1.1458 | 4.72382 | -2.5998 | 0.01453 | 0.46372 | -2.9553 | LOC285768 |
| 206119_at | -2.0936 | 8.36242 | -2.6003 | 0.01452 | 0.46372 | -2.9544 | BHMT |
| 202998_s_at | 1.08938 | 8.89652 | 2.60953 | 0.0142 | 0.46062 | -2.9366 | LOXL2 |
| 219918_s_at | 1.06478 | 5.95212 | 2.61516 | 0.01402 | 0.45918 | -2.9257 | ASPM |
| 203789_s_at | 1.42226 | 6.7961 | 2.61881 | 0.0139 | 0.45636 | -2.9187 | SEMA3C |
| 219277_s_at | -1.2966 | 6.8727 | -2.6241 | 0.01372 | 0.45561 | -2.9085 | OGDHL |
| 223784_at | -2.0758 | 6.11135 | -2.63 | 0.01353 | 0.45312 | -2.897 | TMEM27 |
| 221210_s_at | 1.0702 | 7.15766 | 2.63029 | 0.01353 | 0.45312 | -2.8964 | NPL |
| 204444_at | 1.04359 | 6.10519 | 2.63431 | 0.0134 | 0.45189 | -2.8886 | KIF11 |
| 205244_s_at | 1.05596 | 6.0231 | 2.6354 | 0.01336 | 0.45186 | -2.8865 | SLC13A3 |
| 209270_at | 1.19391 | 7.32168 | 2.63623 | 0.01334 | 0.45186 | -2.8849 | LAMB3 |
| 213790_at | 1.1656 | 6.34074 | 2.65237 | 0.01284 | 0.44364 | -2.8535 | ADAM12 |
| 209708_at | 1.76259 | 7.31678 | 2.66364 | 0.0125 | 0.43886 | -2.8315 | MOXD1 |
| 33323_r_at | 1.93225 | 9.35313 | 2.67282 | 0.01223 | 0.43498 | -2.8136 | SFN |
| 221204_s_at | 1.18782 | 6.2907 | 2.69041 | 0.01173 | 0.42741 | -2.7791 | CRTAC1 |
| 225645_at | 1.99377 | 5.58692 | 2.69376 | 0.01163 | 0.4262 | -2.7725 | EHF |
| 228202_at | -1.3346 | 5.448 | -2.7002 | 0.01145 | 0.42488 | -2.7598 |  |
| 230560_at | 1.46998 | 5.80072 | 2.70117 | 0.01143 | 0.42488 | -2.758 | STXBP6 |
| 227399_at | 1.49452 | 5.44501 | 2.70532 | 0.01132 | 0.42404 | -2.7498 | VGLL3 |
| 210002_at | 1.13427 | 5.54201 | 2.70553 | 0.01131 | 0.42404 | -2.7494 | GATA6 |
| 209612_s_at | 1.77878 | 5.93105 | 2.70878 | 0.01122 | 0.42357 | -2.743 | ADH1B |
| 218469_at | 1.431 | 5.10131 | 2.71016 | 0.01119 | 0.42357 | -2.7403 | GREM1 |
| 218959_at | -1.3575 | 7.52452 | -2.7138 | 0.01109 | 0.42357 | -2.7331 | HOXC10 |
| 226612_at | -1.0396 | 5.42069 | -2.7162 | 0.01103 | 0.42357 | -2.7284 | UBE2QL1 |
| 207847_s_at | 1.07633 | 8.38413 | 2.71942 | 0.01094 | 0.42161 | -2.722 | MUC1 |
| 240910_at | 1.07434 | 4.49915 | 2.72177 | 0.01088 | 0.42106 | -2.7173 |  |
| 218468_s_at | 1.28333 | 4.78596 | 2.72238 | 0.01086 | 0.42106 | -2.7161 | GREM1 |
| 210809_s_at | 1.45122 | 9.68983 | 2.73018 | 0.01066 | 0.4179 | -2.7007 | POSTN |
| 208131_s_at | 1.22812 | 6.63513 | 2.73308 | 0.01059 | 0.41582 | -2.695 | PTGIS |
| 219954_s_at | -1.6517 | 6.25059 | -2.7376 | 0.01047 | 0.4149 | -2.6859 | GBA3 |
| 204580_at | 1.76987 | 5.2256 | 2.73792 | 0.01046 | 0.4149 | -2.6854 | MMP12 |
| 230130_at | 1.23975 | 6.2214 | 2.75017 | 0.01016 | 0.4149 | -2.661 | SLIT2 |
| 241694_at | -1.6738 | 5.74586 | -2.7573 | 0.00999 | 0.41449 | -2.6468 | PKHD1 |
| 204051_s_at | 1.00947 | 6.11282 | 2.75986 | 0.00993 | 0.41449 | -2.6418 | SFRP4 |
| 236952_at | -1.0749 | 6.08027 | -2.7604 | 0.00991 | 0.41449 | -2.6406 |  |
| 226216_at | -1.0634 | 9.45587 | -2.7629 | 0.00985 | 0.41449 | -2.6357 | INSR |
| 235898_at | -1.3717 | 6.02756 | -2.7657 | 0.00979 | 0.41449 | -2.6302 | LOC102723845 |
| 226777_at | 1.34222 | 5.45602 | 2.77876 | 0.00948 | 0.41271 | -2.6041 | ADAM12 |
| 233340_at | 1.57331 | 5.94917 | 2.78123 | 0.00943 | 0.41271 | -2.5992 | SPINK13 |
| 225720_at | -1.0854 | 7.0879 | -2.7816 | 0.00942 | 0.41271 | -2.5984 | SYNPO2 |
| 235301_at | 1.0636 | 6.10034 | 2.78315 | 0.00938 | 0.41271 | -2.5953 | KIAA1324L |
| 204017_at | 1.05469 | 7.7062 | 2.78978 | 0.00923 | 0.4121 | -2.582 | KDELR3 |
| 219747_at | 1.87429 | 6.99296 | 2.79799 | 0.00905 | 0.40941 | -2.5656 | NDNF |
| 226535_at | 1.82715 | 7.78951 | 2.80189 | 0.00897 | 0.40856 | -2.5578 | ITGB6 |
| 205568_at | 1.39931 | 6.4712 | 2.80345 | 0.00893 | 0.408 | -2.5546 | AQP9 |
| 221859_at | 1.44358 | 6.71226 | 2.81525 | 0.00868 | 0.40218 | -2.5309 | SYT13 |
| 237591_at | -1.2477 | 7.40989 | -2.8186 | 0.00861 | 0.40202 | -2.5243 | LINC00173 |
| 1554474_a_at | 1.48979 | 6.37196 | 2.82008 | 0.00858 | 0.40191 | -2.5212 | MOXD1 |
| 227870_at | 2.12893 | 7.1432 | 2.84224 | 0.00813 | 0.3897 | -2.4765 | IGDCC4 |
| 221796_at | -1.4338 | 5.1732 | -2.8483 | 0.00801 | 0.38916 | -2.4642 | NTRK2 |
| 230493_at | 1.05869 | 4.95409 | 2.84873 | 0.008 | 0.38916 | -2.4633 | SHISA2 |
| 225846_at | 1.24143 | 4.37575 | 2.86476 | 0.00769 | 0.38547 | -2.4308 | ESRP1 |
| 207294_at | 1.19118 | 3.95992 | 2.86647 | 0.00766 | 0.38421 | -2.4274 | AGTR2 |
| 209596_at | 1.48438 | 7.84107 | 2.87185 | 0.00756 | 0.38245 | -2.4164 | MXRA5 |
| 205433_at | 1.29894 | 4.51727 | 2.88142 | 0.00738 | 0.37731 | -2.397 | BCHE |
| 203453_at | 1.46134 | 7.46745 | 2.88425 | 0.00733 | 0.37639 | -2.3912 | SCNN1A |
| 225822_at | 1.07322 | 7.31279 | 2.88756 | 0.00727 | 0.37576 | -2.3845 | TMEM125 |
| 231512_at | 1.30933 | 3.83571 | 2.88892 | 0.00725 | 0.37576 | -2.3817 | ATP13A4-AS1 |
| 206858_s_at | -1.0625 | 8.58551 | -2.9055 | 0.00696 | 0.37248 | -2.3478 | HOXC6 |
| 216452_at | -1.0992 | 4.58078 | -2.9086 | 0.00691 | 0.37134 | -2.3416 | TRPM3 |
| 209613_s_at | 2.05254 | 5.52943 | 2.91061 | 0.00687 | 0.37092 | -2.3374 | ADH1B |
| 229800_at | 1.40244 | 7.01002 | 2.91597 | 0.00678 | 0.36933 | -2.3264 | DCLK1 |
| 228865_at | 1.6633 | 5.89133 | 2.91915 | 0.00673 | 0.36877 | -2.3199 | C1orf116 |
| 205404_at | 1.14885 | 5.79245 | 2.92127 | 0.00669 | 0.36795 | -2.3156 | HSD11B1 |
| 204933_s_at | -1.3508 | 6.41526 | -2.9387 | 0.00641 | 0.36237 | -2.2797 | TNFRSF11B |
| 202890_at | -1.066 | 7.41049 | -2.9438 | 0.00633 | 0.36169 | -2.2692 | MAP7 |
| 203889_at | 1.22345 | 5.68587 | 2.96905 | 0.00595 | 0.35075 | -2.2172 | SCG5 |
| 237328_at | -1.3501 | 6.52712 | -2.9766 | 0.00584 | 0.35 | -2.2017 | C14orf105 |
| 229893_at | -1.1993 | 7.48566 | -2.9771 | 0.00583 | 0.35 | -2.2006 | FRMD3 |
| 1555725_a_at | -1.0063 | 5.80429 | -2.9782 | 0.00581 | 0.35 | -2.1983 | RGS5 |
| 221031_s_at | -1.294 | 9.49513 | -2.9823 | 0.00575 | 0.35 | -2.1899 | APOLD1 |
| 226125_at | -1.6641 | 7.95708 | -3.0052 | 0.00544 | 0.34187 | -2.1424 | LOC100288152 |
| 223278_at | 1.86406 | 7.06122 | 3.00592 | 0.00543 | 0.34187 | -2.1408 | GJB2 |
| 235079_at | -1.0156 | 6.53335 | -3.0174 | 0.00527 | 0.33954 | -2.1171 | ZNF704 |
| 218820_at | 1.62203 | 6.57006 | 3.02712 | 0.00515 | 0.33894 | -2.0967 | C14orf132 |
| 228462_at | 1.32422 | 5.41696 | 3.03335 | 0.00507 | 0.33736 | -2.0837 | IRX2 |
| 203788_s_at | 1.11356 | 5.18476 | 3.03618 | 0.00503 | 0.33661 | -2.0778 | SEMA3C |
| 222321_at | 1.14971 | 4.51148 | 3.03704 | 0.00502 | 0.33661 | -2.076 | AGTR2 |
| 209267_s_at | 1.23664 | 8.08837 | 3.03873 | 0.005 | 0.33624 | -2.0725 | SLC39A8 |
| 1555801_s_at | 1.10206 | 4.42906 | 3.04093 | 0.00497 | 0.33614 | -2.0679 | ZNF385B |
| 225316_at | 1.03784 | 6.41222 | 3.0455 | 0.00491 | 0.33511 | -2.0584 | MFSD2A |
| 221911_at | 1.11422 | 6.98325 | 3.0482 | 0.00488 | 0.33398 | -2.0527 | ETV1 |
| 235004_at | -1.1343 | 4.97827 | -3.0524 | 0.00483 | 0.33252 | -2.0438 | RBM24 |
| 1555778_a_at | 1.69986 | 6.27424 | 3.05301 | 0.00482 | 0.33246 | -2.0426 | POSTN |
| 205935_at | 1.07197 | 6.82106 | 3.05337 | 0.00482 | 0.33246 | -2.0419 | FOXF1 |
| 231993_at | 1.77379 | 6.81728 | 3.05873 | 0.00475 | 0.33203 | -2.0307 | ITGBL1 |
| 201852_x_at | 1.16371 | 11.5049 | 3.06962 | 0.00462 | 0.33164 | -2.0078 | COL3A1 |
| 225078_at | 1.15417 | 9.21222 | 3.08219 | 0.00448 | 0.3287 | -1.9814 | EMP2 |
| 210289_at | -2.7043 | 7.85527 | -3.0839 | 0.00446 | 0.3287 | -1.9778 | NAT8 |
| 230645_at | -1.182 | 8.07476 | -3.085 | 0.00445 | 0.3287 | -1.9756 | FRMD3 |
| 203913_s_at | 1.37543 | 4.56495 | 3.0907 | 0.00439 | 0.32803 | -1.9635 | HPGD |
| 206963_s_at | -2.3939 | 7.90741 | -3.0962 | 0.00433 | 0.32514 | -1.952 | NAT8 |
| 228875_at | 1.03816 | 6.04158 | 3.09966 | 0.00429 | 0.32469 | -1.9447 | FAM162B |
| 204363_at | 2.07377 | 7.20518 | 3.10524 | 0.00423 | 0.32194 | -1.9329 | F3 |
| 238865_at | -1.1284 | 5.85371 | -3.1117 | 0.00416 | 0.32064 | -1.9194 | PABPC4L |
| 237058_x_at | -2.6377 | 9.01619 | -3.1137 | 0.00414 | 0.32062 | -1.9151 | SLC6A13 |
| 229070_at | 1.54044 | 5.95698 | 3.11889 | 0.00408 | 0.32062 | -1.9041 | ADTRP |
| 207191_s_at | 1.06528 | 5.73656 | 3.12112 | 0.00406 | 0.32062 | -1.8994 | ISLR |
| 222314_x_at | -1.1473 | 6.33546 | -3.1213 | 0.00406 | 0.32062 | -1.8991 | EGOT |
| 205073_at | -2.0934 | 7.27368 | -3.1246 | 0.00403 | 0.32062 | -1.892 | CYP2J2 |
| 226695_at | 1.25261 | 7.31131 | 3.13197 | 0.00395 | 0.32062 | -1.8764 | PRRX1 |
| 204320_at | 1.72126 | 5.70052 | 3.13468 | 0.00392 | 0.31928 | -1.8707 | COL11A1 |
| 206382_s_at | -1.0895 | 5.12499 | -3.1382 | 0.00389 | 0.31732 | -1.8633 | BDNF |
| 225721_at | -1.0885 | 7.9299 | -3.1393 | 0.00388 | 0.31732 | -1.8609 | SYNPO2 |
| 228885_at | 1.68732 | 5.18004 | 3.1412 | 0.00386 | 0.31732 | -1.8569 | MAMDC2 |
| 241560_at | 1.66522 | 4.60526 | 3.14888 | 0.00379 | 0.3147 | -1.8406 |  |
| 202350_s_at | -1.1539 | 6.25058 | -3.155 | 0.00373 | 0.31352 | -1.8277 | LOC100506558 |
| 234118_at | -1.1019 | 5.44333 | -3.165 | 0.00363 | 0.3085 | -1.8064 |  |
| 236548_at | -1.5756 | 5.54283 | -3.1718 | 0.00357 | 0.30645 | -1.792 | GIPC2 |
| 202404_s_at | 1.12239 | 10.5218 | 3.17454 | 0.00355 | 0.30645 | -1.7861 | COL1A2 |
| 205043_at | 1.02498 | 5.03597 | 3.21276 | 0.00322 | 0.29632 | -1.7045 | CFTR |
| 215059_at | 1.98164 | 5.24535 | 3.2232 | 0.00313 | 0.29525 | -1.6822 |  |
| 241547_at | -1.2667 | 4.45203 | -3.2266 | 0.0031 | 0.2937 | -1.6749 | A1CF |
| 213921_at | -1.1021 | 4.57917 | -3.231 | 0.00307 | 0.29155 | -1.6655 | SST |
| 238488_at | -1.0647 | 5.18355 | -3.2395 | 0.003 | 0.28966 | -1.6472 | IPO11 |
| 203058_s_at | 1.00979 | 8.26565 | 3.24764 | 0.00294 | 0.28913 | -1.6297 | PAPSS2 |
| 1557080_s_at | 1.48755 | 5.82924 | 3.25511 | 0.00289 | 0.28913 | -1.6137 | ITGBL1 |
| 229824_at | 1.03449 | 4.68143 | 3.25552 | 0.00288 | 0.28913 | -1.6128 | SHC3 |
| 227061_at | 1.5087 | 6.01746 | 3.2629 | 0.00283 | 0.28885 | -1.5969 | LINC01279 |
| 37892_at | 1.94183 | 5.7429 | 3.26967 | 0.00278 | 0.28858 | -1.5823 | COL11A1 |
| 238066_at | -1.4865 | 6.54377 | -3.2789 | 0.00272 | 0.2876 | -1.5625 | RBP7 |
| 226553_at | 1.25124 | 6.7676 | 3.28057 | 0.0027 | 0.2876 | -1.5588 | TMPRSS2 |
| 205422_s_at | 1.86798 | 6.35335 | 3.28381 | 0.00268 | 0.2876 | -1.5519 | ITGBL1 |
| 230864_at | 1.00697 | 4.86256 | 3.28991 | 0.00264 | 0.2876 | -1.5387 | NIM1K |
| 218186_at | 1.08932 | 4.70461 | 3.30398 | 0.00254 | 0.28513 | -1.5083 | RAB25 |
| 204124_at | 1.95637 | 5.54939 | 3.32119 | 0.00243 | 0.28138 | -1.471 | SLC34A2 |
| 211597_s_at | 1.41193 | 6.89161 | 3.32333 | 0.00242 | 0.28042 | -1.4664 | HOPX |
| 232056_at | 1.09006 | 3.60408 | 3.32336 | 0.00242 | 0.28042 | -1.4663 | SCEL |
| 217109_at | 1.47891 | 4.68228 | 3.32457 | 0.00241 | 0.28042 | -1.4637 | MUC4 |
| 219093_at | 1.05615 | 5.59634 | 3.32873 | 0.00239 | 0.28042 | -1.4547 | PID1 |
| 203060_s_at | 1.07949 | 8.34706 | 3.33543 | 0.00235 | 0.27887 | -1.4401 | PAPSS2 |
| 209032_s_at | 1.24162 | 6.35749 | 3.33581 | 0.00234 | 0.27887 | -1.4393 | CADM1 |
| 212444_at | 2.55152 | 8.17943 | 3.35089 | 0.00225 | 0.27206 | -1.4065 | GPRC5A |
| 226145_s_at | -1.9803 | 7.40902 | -3.3509 | 0.00225 | 0.27206 | -1.4065 | FRAS1 |
| 203131_at | 1.93366 | 7.34059 | 3.36683 | 0.00216 | 0.26633 | -1.3719 | PDGFRA |
| 205725_at | 1.91316 | 4.52796 | 3.36748 | 0.00216 | 0.26633 | -1.3704 | SCGB1A1 |
| 219866_at | 1.29927 | 7.04123 | 3.37651 | 0.00211 | 0.26208 | -1.3508 | CLIC5 |
| 218211_s_at | 1.00015 | 7.34089 | 3.38099 | 0.00208 | 0.2607 | -1.341 | MLPH |
| 219476_at | 2.62329 | 6.15639 | 3.38815 | 0.00205 | 0.2607 | -1.3254 | C1orf116 |
| 214433_s_at | 1.046 | 7.70782 | 3.40167 | 0.00198 | 0.25702 | -1.2958 | SELENBP1 |
| 39966_at | 1.33768 | 5.59872 | 3.4118 | 0.00192 | 0.25364 | -1.2737 | CSPG5 |
| 1560049_at | 1.04582 | 5.85678 | 3.41687 | 0.0019 | 0.25198 | -1.2626 |  |
| 219230_at | 2.03973 | 6.56572 | 3.42251 | 0.00187 | 0.25198 | -1.2502 | TMEM100 |
| 231478_at | 1.33987 | 4.414 | 3.43581 | 0.00181 | 0.25198 | -1.2211 | LOC729966 |
| 219304_s_at | -1.7912 | 7.66694 | -3.4401 | 0.00179 | 0.25198 | -1.2115 | PDGFD |
| 218424_s_at | 1.50907 | 7.9328 | 3.44499 | 0.00176 | 0.25198 | -1.2009 | STEAP3 |
| 211548_s_at | 1.53276 | 5.83237 | 3.47866 | 0.00162 | 0.23936 | -1.1268 | HPGD |
| 203914_x_at | 1.53935 | 6.18665 | 3.47893 | 0.00161 | 0.23936 | -1.1262 | HPGD |
| 206651_s_at | 1.37924 | 4.16536 | 3.48436 | 0.00159 | 0.23904 | -1.1143 | CPB2 |
| 210640_s_at | -1.0262 | 6.93359 | -3.4932 | 0.00156 | 0.23618 | -1.0949 | GPER1 |
| 214927_at | 1.55232 | 6.98452 | 3.49454 | 0.00155 | 0.23599 | -1.0918 | ITGBL1 |
| 205549_at | 1.152 | 5.06315 | 3.49634 | 0.00154 | 0.23553 | -1.0879 | PCP4 |
| 209147_s_at | -1.2113 | 9.28919 | -3.5004 | 0.00153 | 0.23532 | -1.079 | PPAP2A |
| 1557094_at | 1.37509 | 4.86371 | 3.50327 | 0.00151 | 0.23532 | -1.0725 | LOC100996760 |
| 1554830_a_at | 1.22956 | 4.96499 | 3.51735 | 0.00146 | 0.23524 | -1.0414 | STEAP3 |
| 223503_at | 1.18662 | 6.41057 | 3.53127 | 0.00141 | 0.23522 | -1.0106 | TMEM163 |
| 211161_s_at | 1.44101 | 10.0416 | 3.54422 | 0.00136 | 0.22944 | -0.9819 | COL3A1 |
| 205522_at | -1.0989 | 7.37972 | -3.5555 | 0.00132 | 0.22523 | -0.957 |  |
| 230319_at | 2.60317 | 5.4552 | 3.55826 | 0.00131 | 0.22523 | -0.9508 |  |
| 205226_at | 1.49048 | 5.95123 | 3.56952 | 0.00127 | 0.22369 | -0.9258 | PDGFRL |
| 209016_s_at | 1.83116 | 6.02062 | 3.58041 | 0.00124 | 0.22153 | -0.9016 | KRT7 |
| 202016_at | 1.68784 | 6.95185 | 3.58215 | 0.00123 | 0.22123 | -0.8977 | MEST |
| 236361_at | -1.4483 | 5.71223 | -3.5854 | 0.00122 | 0.22007 | -0.8905 | GALNT15 |
| 219970_at | -1.6565 | 6.05595 | -3.5907 | 0.0012 | 0.21844 | -0.8787 | GIPC2 |
| 204726_at | -1.0625 | 5.57206 | -3.594 | 0.00119 | 0.21726 | -0.8714 | CDH13 |
| 209335_at | 2.33787 | 6.68549 | 3.5967 | 0.00118 | 0.21696 | -0.8654 | DCN |
| 202995_s_at | 1.50277 | 6.095 | 3.59987 | 0.00117 | 0.2168 | -0.8583 | FBLN1 |
| 237212_at | 1.31724 | 4.32897 | 3.60166 | 0.00117 | 0.2168 | -0.8543 |  |
| 228850_s_at | 1.23807 | 5.38066 | 3.60484 | 0.00116 | 0.21636 | -0.8472 | SLIT2 |
| 202994_s_at | 1.26785 | 6.7098 | 3.60837 | 0.00115 | 0.21636 | -0.8394 | FBLN1 |
| 227480_at | 1.79426 | 6.37269 | 3.62082 | 0.00111 | 0.21636 | -0.8116 | SUSD2 |
| 204939_s_at | -1.2886 | 5.57259 | -3.6219 | 0.00111 | 0.21636 | -0.8091 | PLN |
| 210066_s_at | 1.4914 | 3.93517 | 3.62332 | 0.0011 | 0.21636 | -0.806 | AQP4 |
| 231240_at | 1.05369 | 5.23563 | 3.62589 | 0.0011 | 0.21636 | -0.8003 | DIO2 |
| 1556421_at | 1.20463 | 3.87322 | 3.63413 | 0.00107 | 0.21545 | -0.7819 | LOC286189 |
| 230109_at | -1.0135 | 6.01242 | -3.6384 | 0.00106 | 0.21545 | -0.7724 | PDE7B |
| 231859_at | 1.11955 | 5.68774 | 3.659 | 0.001 | 0.21018 | -0.7263 | C14orf132 |
| 204475_at | 2.52284 | 5.64298 | 3.66496 | 0.00099 | 0.20944 | -0.713 | MMP1 |
| 235568_at | 1.57885 | 7.45365 | 3.66948 | 0.00098 | 0.20944 | -0.7028 | MCEMP1 |
| 205697_at | -1.8334 | 6.14251 | -3.6711 | 0.00097 | 0.20944 | -0.6992 | SCGN |
| 210946_at | -1.2092 | 10.0209 | -3.6747 | 0.00096 | 0.20944 | -0.6911 | PPAP2A |
| 240715_at | 1.18508 | 5.13181 | 3.67649 | 0.00096 | 0.20944 | -0.6871 | TBX5 |
| 228004_at | 1.05027 | 4.91779 | 3.68246 | 0.00094 | 0.20944 | -0.6737 | LINC00261 |
| 239636_at | -1.1705 | 4.80379 | -3.6871 | 0.00093 | 0.20944 | -0.6633 | MCF2L |
| 214373_at | -1.0252 | 6.7879 | -3.709 | 0.00088 | 0.20433 | -0.6142 |  |
| 32128_at | 2.62028 | 7.08466 | 3.71177 | 0.00087 | 0.20415 | -0.608 | CCL18 |
| 206884_s_at | 1.28838 | 3.89859 | 3.7281 | 0.00083 | 0.19839 | -0.5713 | SCEL |
| 235033_at | 1.04395 | 6.92064 | 3.73111 | 0.00083 | 0.19765 | -0.5645 | NPEPL1 |
| 232578_at | 1.71023 | 3.8857 | 3.74749 | 0.00079 | 0.19426 | -0.5276 | CLDN18 |
| 220951_s_at | -1.8486 | 6.65767 | -3.7485 | 0.00079 | 0.19426 | -0.5254 | A1CF |
| 210067_at | 1.60714 | 4.0627 | 3.7558 | 0.00077 | 0.1936 | -0.5089 | AQP4 |
| 202283_at | 1.16102 | 7.89846 | 3.76593 | 0.00075 | 0.19092 | -0.4861 | SERPINF1 |
| 217046_s_at | 1.37741 | 6.17553 | 3.76595 | 0.00075 | 0.19092 | -0.486 | AGER |
| 229177_at | 1.83335 | 6.15636 | 3.76847 | 0.00075 | 0.19092 | -0.4803 | C16orf89 |
| 209173_at | 1.28229 | 5.16644 | 3.77465 | 0.00074 | 0.19092 | -0.4664 | AGR2 |
| 219869_s_at | 1.36585 | 7.06922 | 3.78181 | 0.00072 | 0.19092 | -0.4502 | SLC39A8 |
| 209924_at | 2.556 | 7.83044 | 3.78906 | 0.00071 | 0.19092 | -0.4339 | CCL18 |
| 229030_at | 1.61184 | 4.88134 | 3.79795 | 0.00069 | 0.19018 | -0.4138 | CAPN8 |
| 219580_s_at | 1.98765 | 4.94939 | 3.79833 | 0.00069 | 0.19018 | -0.4129 | TMC5 |
| 204130_at | -1.1758 | 5.27749 | -3.7995 | 0.00069 | 0.19018 | -0.4104 | HSD11B2 |
| 227197_at | 1.6351 | 5.45859 | 3.80558 | 0.00068 | 0.19018 | -0.3965 | ARHGEF26 |
| 1556499_s_at | 1.54061 | 10.6991 | 3.82206 | 0.00065 | 0.18605 | -0.3592 | COL1A1 |
| 201069_at | 1.52628 | 7.30546 | 3.83182 | 0.00063 | 0.1838 | -0.3372 | MMP2 |
| 219434_at | 1.36637 | 5.85855 | 3.84592 | 0.00061 | 0.18179 | -0.3052 | TREM1 |
| 211896_s_at | 2.353 | 7.29604 | 3.84616 | 0.00061 | 0.18179 | -0.3047 | DCN |
| 217787_s_at | 1.18733 | 6.87989 | 3.86047 | 0.00059 | 0.17871 | -0.2722 | GALNT2 |
| 203325_s_at | 1.70511 | 8.01476 | 3.8655 | 0.00058 | 0.1783 | -0.2608 | COL5A1 |
| 229309_at | 1.53928 | 4.6199 | 3.8733 | 0.00057 | 0.17717 | -0.2431 | ADRB1 |
| 205440_s_at | -1.8637 | 5.56762 | -3.8815 | 0.00055 | 0.17717 | -0.2246 | NPY1R |
| 37512_at | 1.85902 | 4.49621 | 3.88196 | 0.00055 | 0.17717 | -0.2234 | HSD17B6 |
| 203108_at | 2.37264 | 7.24868 | 3.88452 | 0.00055 | 0.17717 | -0.2176 | GPRC5A |
| 201438_at | 1.71916 | 10.8884 | 3.89316 | 0.00054 | 0.17717 | -0.198 | COL6A3 |
| 211813_x_at | 1.91369 | 8.01097 | 3.92155 | 0.0005 | 0.1728 | -0.1334 | DCN |
| 205700_at | 1.85651 | 5.38922 | 3.92278 | 0.00049 | 0.1728 | -0.1306 | HSD17B6 |
| 221898_at | 1.67501 | 5.22817 | 3.95513 | 0.00045 | 0.16406 | -0.0569 | PDPN |
| 206742_at | 1.11682 | 5.26449 | 3.97746 | 0.00043 | 0.15972 | -0.006 | FIGF |
| 202310_s_at | 1.96319 | 8.75827 | 3.98422 | 0.00042 | 0.15972 | 0.00944 | COL1A1 |
| 221133_s_at | 1.42978 | 5.13074 | 3.99438 | 0.00041 | 0.15972 | 0.03263 | CLDN18 |
| 209616_s_at | 1.68775 | 5.97476 | 4.07403 | 0.00033 | 0.14474 | 0.21492 | CES1 |
| 1556037_s_at | 1.57521 | 4.95933 | 4.07785 | 0.00032 | 0.14474 | 0.22367 | HHIP |
| 238222_at | 1.15039 | 4.87095 | 4.07814 | 0.00032 | 0.14474 | 0.22433 | GKN2 |
| 205819_at | 2.21776 | 7.62384 | 4.08193 | 0.00032 | 0.14474 | 0.23303 | MARCO |
| 204811_s_at | 1.71806 | 7.19821 | 4.08969 | 0.00031 | 0.14474 | 0.25083 | CACNA2D2 |
| 213317_at | 2.21608 | 6.28591 | 4.09314 | 0.00031 | 0.14474 | 0.25874 | CLIC5 |
| 1555497_a_at | 1.1734 | 5.4504 | 4.11139 | 0.0003 | 0.14338 | 0.30062 | CYP4B1 |
| 205578_at | 1.04311 | 4.56522 | 4.11448 | 0.00029 | 0.14338 | 0.30772 | ROR2 |
| 201893_x_at | 2.13988 | 8.52747 | 4.11695 | 0.00029 | 0.14338 | 0.3134 | DCN |
| 215104_at | -1.2048 | 6.06423 | -4.1325 | 0.00028 | 0.14031 | 0.34916 | NRIP2 |
| 204343_at | 1.16334 | 8.20428 | 4.13782 | 0.00028 | 0.14031 | 0.36133 | ABCA3 |
| 206367_at | -2.0952 | 5.46567 | -4.1412 | 0.00027 | 0.14031 | 0.36916 | REN |
| 228501_at | -1.2653 | 4.82041 | -4.1609 | 0.00026 | 0.13478 | 0.41447 | GALNT15 |
| 212488_at | 1.60339 | 8.44805 | 4.1626 | 0.00026 | 0.13478 | 0.4183 | COL5A1 |
| 210081_at | 1.74245 | 5.98443 | 4.20114 | 0.00023 | 0.12902 | 0.507 | AGER |
| 204975_at | 1.04935 | 7.6881 | 4.20327 | 0.00023 | 0.12902 | 0.5119 | EMP2 |
| 212489_at | 1.77149 | 7.67332 | 4.23313 | 0.00021 | 0.12356 | 0.58072 | COL5A1 |
| 201744_s_at | 3.20048 | 8.08985 | 4.24943 | 0.0002 | 0.11944 | 0.61829 | LUM |
| 228241_at | 1.46364 | 3.93462 | 4.25214 | 0.0002 | 0.11944 | 0.62455 | AGR3 |
| 237466_s_at | 1.63071 | 4.89449 | 4.26112 | 0.0002 | 0.11944 | 0.64526 | HHIP |
| 202311_s_at | 1.98675 | 6.536 | 4.27455 | 0.00019 | 0.11782 | 0.67625 | COL1A1 |
| 210068_s_at | 2.18272 | 5.05859 | 4.2859 | 0.00018 | 0.11552 | 0.70244 | AQP4 |
| 225079_at | 1.43114 | 7.81153 | 4.30778 | 0.00017 | 0.11136 | 0.75297 | EMP2 |
| 207051_at | -1.9538 | 5.51866 | -4.3332 | 0.00016 | 0.10762 | 0.8117 | SLC17A4 |
| 217428_s_at | 1.50499 | 4.50898 | 4.35522 | 0.00015 | 0.10384 | 0.86259 | COL10A1 |
| 228218_at | 1.04211 | 4.14654 | 4.36005 | 0.00015 | 0.10384 | 0.87375 | LSAMP |
| 230867_at | 1.40144 | 4.20623 | 4.37695 | 0.00014 | 0.10162 | 0.91284 | COL6A6 |
| 205116_at | 1.08637 | 5.58374 | 4.39574 | 0.00014 | 0.09863 | 0.9563 | LAMA2 |
| 205569_at | 2.59627 | 7.45706 | 4.41433 | 0.00013 | 0.0967 | 0.99933 | LAMP3 |
| 219597_s_at | 1.5063 | 5.19811 | 4.42163 | 0.00013 | 0.09609 | 1.01622 | DUOX1 |
| 228708_at | 1.42062 | 7.04004 | 4.46445 | 0.00011 | 0.09041 | 1.11537 | RAB27B |
| 210272_at | 1.23329 | 5.55866 | 4.53092 | 9.36E-05 | 0.07873 | 1.2694 | CYP2B7P |
| 232267_at | 1.30698 | 5.05708 | 4.55069 | 8.86E-05 | 0.07571 | 1.31525 | GPR133 |
| 229150_at | 1.16718 | 4.96643 | 4.57742 | 8.23E-05 | 0.07258 | 1.37722 |  |
| 236121_at | -1.0162 | 4.19408 | -4.58 | 8.17E-05 | 0.07258 | 1.38314 | OR51E2 |
| 210906_x_at | 2.56436 | 5.23584 | 4.64567 | 6.81E-05 | 0.06466 | 1.53549 | AQP4 |
| 216840_s_at | 1.08181 | 5.62635 | 4.6826 | 6.15E-05 | 0.06006 | 1.62117 | LAMA2 |
| 226960_at | 1.25423 | 5.2523 | 4.68828 | 6.06E-05 | 0.06006 | 1.63434 | CXCL17 |
| 213519_s_at | 1.1998 | 5.78856 | 4.761 | 4.95E-05 | 0.05205 | 1.80302 | LAMA2 |
| 212942_s_at | 1.50022 | 4.9516 | 4.76538 | 4.89E-05 | 0.05205 | 1.81318 | CEMIP |
| 219087_at | 1.58963 | 7.99485 | 4.78584 | 4.62E-05 | 0.05053 | 1.86063 | ASPN |
| 205941_s_at | 1.07053 | 5.61311 | 4.80099 | 4.43E-05 | 0.04944 | 1.89577 | COL10A1 |
| 229554_at | 1.71641 | 4.88596 | 4.81972 | 4.21E-05 | 0.04944 | 1.9392 | LUM |
| 204424_s_at | 2.64109 | 6.42259 | 4.84402 | 3.93E-05 | 0.04886 | 1.99553 | LMO3 |
| 227848_at | 1.42978 | 5.00217 | 4.87806 | 3.58E-05 | 0.04657 | 2.07442 | PEBP4 |
| 233947_s_at | 1.4116 | 4.18824 | 4.89102 | 3.45E-05 | 0.04602 | 2.10446 | TBX5-AS1 |
| 219454_at | 3.10462 | 6.05938 | 4.89339 | 3.43E-05 | 0.04602 | 2.10994 | EGFL6 |
| 211024_s_at | 1.8983 | 4.89251 | 4.90095 | 3.36E-05 | 0.04602 | 2.12745 | NKX2-1 |
| 204712_at | 2.79016 | 5.02993 | 4.91525 | 3.23E-05 | 0.04602 | 2.1606 | WIF1 |
| 208250_s_at | 2.48261 | 7.41417 | 4.93341 | 3.07E-05 | 0.04533 | 2.20264 | DMBT1 |
| 238017_at | 2.27551 | 4.62109 | 4.94406 | 2.98E-05 | 0.04524 | 2.22732 | SDR16C5 |
| 238617_at | 1.54629 | 6.45369 | 5.01302 | 2.46E-05 | 0.03842 | 2.38692 | KIF26B |
| 226228_at | 3.42761 | 5.84132 | 5.03924 | 2.29E-05 | 0.03677 | 2.44755 | AQP4 |
| 223806_s_at | 2.95692 | 8.21833 | 5.04713 | 2.24E-05 | 0.03677 | 2.4658 | NAPSA |
| 244056_at | 2.27814 | 4.86884 | 5.10724 | 1.89E-05 | 0.03339 | 2.60468 | SFTA2 |
| 228504_at | 2.50156 | 4.83723 | 5.11356 | 1.86E-05 | 0.03339 | 2.61927 | SCN7A |
| 226997_at | 1.26896 | 6.10983 | 5.15023 | 1.68E-05 | 0.03168 | 2.7039 | ADAMTS12 |
| 205654_at | 2.98821 | 7.31299 | 5.16977 | 1.59E-05 | 0.03108 | 2.74895 | C4BPA |
| 230135_at | 2.11982 | 5.21588 | 5.21268 | 1.41E-05 | 0.02861 | 2.84784 | HHIP |
| 223690_at | 1.09885 | 6.28738 | 5.23076 | 1.34E-05 | 0.02825 | 2.88947 | LTBP2 |
| 219795_at | 2.81817 | 4.53885 | 5.23352 | 1.33E-05 | 0.02825 | 2.89583 | SLC6A14 |
| 205927_s_at | 2.35089 | 6.60365 | 5.25475 | 1.26E-05 | 0.02825 | 2.94468 | CTSE |
| 228782_at | 2.03185 | 4.98985 | 5.28058 | 1.17E-05 | 0.02781 | 3.00408 | SCGB3A2 |
| 214135_at | 2.79874 | 6.12256 | 5.32138 | 1.04E-05 | 0.0272 | 3.09784 | CLDN18 |
| 205261_at | 2.21049 | 6.42229 | 5.36116 | 9.36E-06 | 0.02558 | 3.18913 | PGC |
| 214199_at | 3.69376 | 7.0905 | 5.41161 | 8.14E-06 | 0.02341 | 3.30473 | SFTPD |
| 38691_s_at | 3.86307 | 9.443 | 5.41191 | 8.13E-06 | 0.02341 | 3.30541 | SFTPC |
| 210096_at | 3.63115 | 5.49122 | 5.42126 | 7.92E-06 | 0.02341 | 3.32682 | CYP4B1 |
| 228979_at | 3.34678 | 4.73277 | 5.51574 | 6.10E-06 | 0.02084 | 3.54269 | SFTA3 |
| 211657_at | 2.60651 | 5.70384 | 5.5302 | 5.86E-06 | 0.02084 | 3.57568 | CEACAM6 |
| 206754_s_at | 2.15761 | 6.69798 | 5.5388 | 5.72E-06 | 0.02084 | 3.59527 | CYP2B6 |
| 203757_s_at | 3.38194 | 5.86551 | 5.60804 | 4.72E-06 | 0.01987 | 3.75286 | CEACAM6 |
| 243929_at | 3.43631 | 5.30745 | 5.70233 | 3.64E-06 | 0.01659 | 3.96671 |  |
| 223678_s_at | 4.46973 | 5.85895 | 5.74311 | 3.25E-06 | 0.01617 | 4.05894 | SFTPA1 |
| 205982_x_at | 4.60776 | 7.71146 | 5.75466 | 3.15E-06 | 0.01617 | 4.08503 | SFTPC |
| 213936_x_at | 2.78165 | 8.46224 | 5.85784 | 2.37E-06 | 0.01441 | 4.31743 | SFTPB |
| 214387_x_at | 4.85029 | 7.65151 | 5.92518 | 1.97E-06 | 0.01348 | 4.46849 | SFTPC |
| 215454_x_at | 3.0217 | 7.17163 | 5.92896 | 1.95E-06 | 0.01348 | 4.47696 | SFTPC |
| 214354_x_at | 1.27097 | 6.61108 | 5.97725 | 1.71E-06 | 0.01348 | 4.58493 | SFTPB |
| 211735_x_at | 4.85996 | 7.61591 | 6.01995 | 1.52E-06 | 0.01348 | 4.68017 | SFTPC |
| 218835_at | 6.54894 | 7.58966 | 6.42863 | 5.00E-07 | 0.00683 | 5.57998 | SFTPA1 |
| 37004_at | 5.40804 | 6.9683 | 6.47813 | 4.37E-07 | 0.00683 | 5.68741 | SFTPB |
| 209810_at | 5.14301 | 7.68216 | 6.55235 | 3.58E-07 | 0.00683 | 5.84785 | SFTPB |
| 206377_at | 1.53329 | 5.36154 | 6.80397 | 1.82E-07 | 0.00683 | 6.38566 | FOXF2 |

**Supplementary Table S3** Genes differentially expressed between the primary and metastatic ccRCC tissues derivatives 163 genes in both GSE22541 and GSE85258 assays

| Gene | logFC.  GSE85258 | P.Value.  GSE85258 | adj.P.Val.  GSE85258 | logFC.  GSE22541 | AveExpr.  GSE22541 | P.Value.  GSE22541 | adj.P.Val.  GSE22541 |
| --- | --- | --- | --- | --- | --- | --- | --- |
| ZNF711 | -1.30911 | 0.021071 | 0.510024 | -1.48725 | 6.408592 | 0.002341 | 0.030417 |
| WNT5A | 1.29312 | 0.019228 | 0.498989 | 1.185987 | 6.440199 | 0.001733 | 0.025523 |
| WIF1 | 2.790162 | 3.23E-05 | 0.04602 | 2.643878 | 4.55125 | 2.63E-06 | 0.0005 |
| VGLL3 | 1.494516 | 0.011315 | 0.424039 | 1.698324 | 5.660161 | 0.000807 | 0.016116 |
| TRPM3 | -1.09922 | 0.006907 | 0.371335 | -1.96343 | 5.10832 | 9.39E-05 | 0.004446 |
| TMPRSS2 | 1.251241 | 0.002703 | 0.287602 | 1.124013 | 6.421224 | 5.06E-06 | 0.000767 |
| TMEM30B | 1.233846 | 0.016362 | 0.482992 | 1.308746 | 4.911092 | 0.000505 | 0.012288 |
| TMEM100 | 2.039726 | 0.001871 | 0.251976 | 2.383934 | 6.508498 | 3.45E-05 | 0.00246 |
| TMC5 | 1.98765 | 0.000691 | 0.190176 | 2.309616 | 4.562706 | 4.48E-09 | 1.02E-05 |
| TINAG | -1.09912 | 0.038695 | 0.570429 | -1.68846 | 6.010872 | 0.000196 | 0.00691 |
| TBX5-AS1 | 1.411598 | 3.45E-05 | 0.04602 | 1.495787 | 3.92779 | 2.46E-08 | 2.75E-05 |
| TBX5 | 1.185077 | 0.000958 | 0.209438 | 2.133289 | 6.200406 | 2.77E-08 | 2.97E-05 |
| STXBP6 | 1.469977 | 0.011428 | 0.424883 | 1.516394 | 5.699663 | 0.001507 | 0.023452 |
| STK32B | -1.03295 | 0.030659 | 0.550683 | -1.13614 | 6.977918 | 0.002248 | 0.02975 |
| STEAP3 | 1.50907 | 0.001764 | 0.251976 | 1.124126 | 7.878686 | 0.005177 | 0.048957 |
| SLIT2 | 1.238911 | 0.00566 | 0.31563 | 2.16954 | 6.421009 | 8.75E-09 | 1.53E-05 |
| SLC6A14 | 2.818168 | 1.33E-05 | 0.028253 | 1.868004 | 3.558106 | 2.47E-05 | 0.001991 |
| SLC34A2 | 1.956369 | 0.002434 | 0.281377 | 2.199073 | 7.690814 | 4.88E-07 | 0.000177 |
| SLC27A2 | -1.64696 | 0.019452 | 0.499852 | -1.74193 | 6.799208 | 0.002777 | 0.033622 |
| SLC17A3 | -2.71985 | 0.024485 | 0.525352 | -2.3227 | 8.838249 | 0.004261 | 0.043647 |
| SHISA2 | 1.05869 | 0.007999 | 0.389162 | 1.055796 | 4.170538 | 0.000107 | 0.00484 |
| SFTPD | 3.693759 | 8.14E-06 | 0.023412 | 3.454942 | 6.606158 | 5.29E-09 | 1.07E-05 |
| SFTPC | 4.240556 | 3.34E-06 | 0.016002 | 3.974534 | 7.613612 | 5.17E-08 | 2.77E-05 |
| SFTPB | 3.650918 | 1.22E-06 | 0.010387 | 4.24866 | 7.598763 | 6.60E-09 | 7.37E-06 |
| SFTPA1 | 5.509338 | 1.88E-06 | 0.011501 | 5.060055 | 6.123329 | 2.05E-07 | 8.11E-05 |
| SFTA3 | 3.346781 | 6.1E-06 | 0.020837 | 3.442496 | 4.327037 | 6.73E-08 | 4.97E-05 |
| SFTA2 | 2.27814 | 1.89E-05 | 0.03339 | 3.309921 | 5.086309 | 9.48E-08 | 0.000064 |
| SFRP4 | 1.009466 | 0.009926 | 0.414493 | 2.068876 | 6.591163 | 3.44E-05 | 0.00246 |
| SFN | 1.591295 | 0.020357 | 0.488295 | 1.921356 | 8.241646 | 2.93E-06 | 0.000489 |
| SERPINF1 | 1.161021 | 0.000754 | 0.190916 | 1.297686 | 9.125808 | 0.001906 | 0.027033 |
| SDR16C5 | 2.275515 | 2.98E-05 | 0.045235 | 2.035227 | 3.995145 | 2.56E-05 | 0.00204 |
| SCNN1A | 1.461336 | 0.007333 | 0.376388 | 1.239548 | 6.474691 | 0.004761 | 0.046586 |
| SCN7A | 2.501558 | 1.86E-05 | 0.03339 | 3.862196 | 5.037007 | 1.37E-13 | 9.33E-10 |
| SCGN | -1.83339 | 0.000972 | 0.209438 | -2.3526 | 6.267411 | 2.31E-05 | 0.001921 |
| SCGB3A2 | 2.031852 | 1.17E-05 | 0.027815 | 3.71794 | 5.651554 | 2.98E-09 | 7.75E-06 |
| SCGB1A1 | 1.913163 | 0.002159 | 0.266334 | 2.281983 | 5.010463 | 0.000144 | 0.005706 |
| SCEL | 1.189222 | 0.001628 | 0.239403 | 1.276587 | 3.482428 | 0.000698 | 0.014669 |
| SALL1 | -1.10305 | 0.034041 | 0.562634 | -1.36788 | 7.171507 | 0.004975 | 0.04784 |
| REN | -2.09516 | 0.000273 | 0.140311 | -3.52713 | 5.973857 | 5.13E-07 | 0.000179 |
| PTGIS | 1.228116 | 0.010587 | 0.415821 | 2.033304 | 7.624693 | 1.86E-05 | 0.001676 |
| PSD3 | 1.191106 | 0.022955 | 0.518615 | 1.000867 | 4.638928 | 5.52E-05 | 0.003243 |
| PRRX1 | 1.252607 | 0.003951 | 0.320616 | 1.96962 | 7.032332 | 0.00003 | 0.002255 |
| POSTN | 1.575541 | 0.007742 | 0.375182 | 1.817838 | 9.343529 | 0.00046 | 0.011172 |
| PKHD1 | -1.67375 | 0.009987 | 0.414493 | -1.72829 | 6.199246 | 0.001067 | 0.019053 |
| PGC | 2.210486 | 9.36E-06 | 0.025579 | 1.188347 | 5.906907 | 4.11E-05 | 0.002731 |
| PEBP4 | 1.429776 | 3.58E-05 | 0.046571 | 1.709009 | 5.088343 | 0.000131 | 0.005417 |
| PDPN | 1.675013 | 0.000453 | 0.16406 | 1.042832 | 4.544444 | 0.000441 | 0.011367 |
| PDGFRL | 1.490481 | 0.001272 | 0.223692 | 1.607917 | 5.87241 | 6.84E-05 | 0.003672 |
| PDGFRA | 1.933658 | 0.002163 | 0.266334 | 2.692581 | 7.794601 | 7.49E-06 | 0.00096 |
| PDGFD | -1.79117 | 0.001787 | 0.251976 | -1.22658 | 8.168171 | 0.001796 | 0.026083 |
| PDE7B | -1.01353 | 0.00106 | 0.215455 | -1.14089 | 6.81631 | 0.000037 | 0.002543 |
| PCP4 | 1.152002 | 0.001542 | 0.235531 | 1.510643 | 4.686089 | 1.79E-06 | 0.000384 |
| PCK1 | -1.64981 | 0.027412 | 0.536734 | -2.77613 | 7.01792 | 0.000661 | 0.014422 |
| PAPSS2 | 1.044641 | 0.002644 | 0.283999 | 1.095393 | 9.785496 | 2.27E-05 | 0.001888 |
| PABPC4L | -1.12837 | 0.00416 | 0.320639 | -1.04166 | 7.054924 | 0.000792 | 0.015977 |
| OR51E2 | -1.01617 | 8.17E-05 | 0.072581 | -1.01042 | 4.336484 | 5.74E-05 | 0.003291 |
| NRIP2 | -1.20477 | 0.00028 | 0.140311 | -1.26364 | 5.601097 | 9.37E-07 | 0.000251 |
| NPY1R | -1.86365 | 0.000553 | 0.177169 | -1.92797 | 6.1308 | 9.45E-05 | 0.004467 |
| NKX2-1 | 1.898304 | 3.36E-05 | 0.04602 | 2.25211 | 5.02113 | 4.94E-07 | 0.000178 |
| NAT8 | -2.39388 | 0.004326 | 0.325144 | -2.13397 | 8.314402 | 0.003596 | 0.03935 |
| NAPSA | 2.956916 | 2.24E-05 | 0.036772 | 2.130434 | 7.558819 | 2.93E-05 | 0.002216 |
| MXRA5 | 1.484384 | 0.007559 | 0.382445 | 2.390551 | 8.612466 | 5.03E-07 | 0.000179 |
| MUC1 | 1.07633 | 0.01094 | 0.421609 | 1.038209 | 8.136291 | 0.001635 | 0.024659 |
| MOXD1 | 1.626187 | 0.010538 | 0.420384 | 2.125097 | 6.768822 | 1.01E-05 | 0.001075 |
| MMP2 | 1.526283 | 0.000632 | 0.183796 | 1.54017 | 9.033643 | 0.000081 | 0.00408 |
| MLPH | 1.000154 | 0.002085 | 0.260701 | 1.067833 | 7.409782 | 0.000295 | 0.008761 |
| MIOX | -1.0381 | 0.029024 | 0.54347 | -1.71902 | 7.129796 | 0.002555 | 0.031932 |
| MEST | 1.687845 | 0.00123 | 0.221232 | 2.057098 | 8.223019 | 5.91E-07 | 0.000188 |
| MAPT | -1.08829 | 0.019696 | 0.501972 | -1.73801 | 7.005124 | 9E-06 | 0.001079 |
| MAMDC2 | 1.687318 | 0.00386 | 0.317318 | 1.483342 | 4.762081 | 0.001164 | 0.020007 |
| LUM | 2.458448 | 0.000123 | 0.084435 | 3.123416 | 8.05308 | 3.05E-06 | 0.000544 |
| LTBP2 | 1.098849 | 1.34E-05 | 0.028253 | 1.416713 | 7.672897 | 2.81E-05 | 0.002162 |
| LSAMP | 1.042105 | 0.00015 | 0.103835 | 1.717745 | 4.261008 | 7E-08 | 5.11E-05 |
| LOC102723845 | -1.37166 | 0.009788 | 0.414493 | -1.61536 | 6.055098 | 0.000148 | 0.005813 |
| LOC100288152 | -1.66409 | 0.005436 | 0.341871 | -1.69443 | 7.108047 | 0.000167 | 0.006226 |
| LMO3 | 2.641087 | 3.93E-05 | 0.048858 | 2.157494 | 5.572113 | 2.72E-07 | 0.000124 |
| LINC01279 | 1.508695 | 0.002829 | 0.288852 | 1.677547 | 5.693342 | 0.00166 | 0.024882 |
| LAMP3 | 2.596272 | 0.000129 | 0.096702 | 2.466353 | 7.41078 | 3.81E-06 | 0.00064 |
| LAMA2 | 1.122657 | 8.23E-05 | 0.070248 | 1.585693 | 5.842103 | 4.14E-08 | 3.55E-05 |
| KRT7 | 1.831155 | 0.001236 | 0.221526 | 1.881872 | 6.411004 | 5.44E-05 | 0.003221 |
| KIF26B | 1.546286 | 2.46E-05 | 0.038419 | 1.720589 | 6.121776 | 7.52E-06 | 0.000961 |
| KIAA1324L | 1.063602 | 0.009383 | 0.41271 | 1.03782 | 6.004436 | 0.000202 | 0.006999 |
| KDELR3 | 1.05469 | 0.009234 | 0.412104 | 1.475218 | 9.145653 | 8.11E-05 | 0.004081 |
| KCNAB1 | -1.32318 | 0.020869 | 0.508864 | -1.49048 | 5.750307 | 2.95E-05 | 0.002225 |
| ITGBL1 | 1.670408 | 0.002967 | 0.286185 | 2.278517 | 6.703665 | 8.56E-08 | 5.24E-05 |
| ITGB6 | 1.827147 | 0.008966 | 0.408558 | 1.721475 | 7.646783 | 0.003788 | 0.040571 |
| ISLR | 1.06528 | 0.004061 | 0.320616 | 1.537516 | 6.245456 | 7.85E-05 | 0.003989 |
| IRX2 | 1.324217 | 0.005066 | 0.337357 | 1.482076 | 5.389073 | 1.32E-05 | 0.00139 |
| IGKV1-37 | 1.239896 | 0.032332 | 0.557482 | 1.631986 | 7.784469 | 0.001255 | 0.020938 |
| IGKV1-17 | 1.533925 | 0.035842 | 0.568414 | 1.759774 | 6.935748 | 0.003722 | 0.040149 |
| IGKC | 1.35402 | 0.025804 | 0.531301 | 1.421415 | 8.985972 | 0.004389 | 0.044463 |
| IGK | 1.447353 | 0.030067 | 0.54449 | 1.65529 | 9.285782 | 0.00187 | 0.026238 |
| IGJ | 1.491747 | 0.047171 | 0.591529 | 2.114303 | 9.237204 | 0.001146 | 0.01986 |
| IGDCC4 | 2.128928 | 0.008127 | 0.389697 | 1.397285 | 4.892515 | 0.005125 | 0.048615 |
| HSD17B6 | 1.857765 | 0.000523 | 0.174982 | 1.717425 | 4.429833 | 0.000669 | 0.014521 |
| HSD11B1 | 1.148853 | 0.006694 | 0.367949 | 1.168672 | 6.063105 | 0.000878 | 0.016974 |
| HP | 1.961898 | 0.024355 | 0.521715 | 2.253703 | 6.096652 | 0.001339 | 0.01953 |
| HOPX | 1.411925 | 0.002421 | 0.28042 | 1.579784 | 8.333608 | 8.98E-05 | 0.004349 |
| HHIP | 1.775244 | 0.000179 | 0.097593 | 1.118358 | 4.142505 | 0.000526 | 0.011378 |
| GREM1 | 1.430997 | 0.011185 | 0.423571 | 1.899789 | 4.791001 | 0.002408 | 0.030891 |
| GPRC5A | 2.462084 | 0.001401 | 0.224615 | 2.590486 | 6.709732 | 2.08E-07 | 0.0001 |
| GPR133 | 1.306976 | 8.86E-05 | 0.075706 | 1.162902 | 4.657887 | 0.000149 | 0.005814 |
| GLYATL1 | -1.62712 | 0.034891 | 0.565949 | -1.7163 | 6.681717 | 0.004332 | 0.044075 |
| GKN2 | 1.150386 | 0.000324 | 0.144736 | 1.645286 | 4.800124 | 3.47E-05 | 0.002462 |
| GATA6 | 1.134266 | 0.01131 | 0.424039 | 1.640105 | 6.796196 | 0.000166 | 0.006225 |
| GALNT15 | -1.35677 | 0.000739 | 0.177426 | -1.27901 | 5.996834 | 0.000788 | 0.015667 |
| FRMD3 | -1.19069 | 0.005139 | 0.339348 | -1.3109 | 7.548416 | 0.002577 | 0.030853 |
| FOXF2 | 1.533286 | 1.82E-07 | 0.00683 | 2.20713 | 5.625022 | 3.72E-11 | 1.85E-07 |
| FOXF1 | 1.071971 | 0.004818 | 0.332464 | 1.180008 | 6.78699 | 0.000861 | 0.016789 |
| FGG | 2.917457 | 0.035944 | 0.568414 | 3.197346 | 7.073344 | 0.000948 | 0.017756 |
| FBLN1 | 1.385309 | 0.001161 | 0.216584 | 2.529963 | 7.064211 | 7.23E-07 | 0.000179 |
| FAM162B | 1.038159 | 0.004288 | 0.324695 | 1.663148 | 7.032693 | 9.62E-07 | 0.000255 |
| F3 | 2.073771 | 0.004228 | 0.321939 | 1.737204 | 6.667853 | 1.45E-05 | 0.001468 |
| ETV1 | 1.114225 | 0.004881 | 0.33398 | 1.960952 | 7.080976 | 6.92E-07 | 0.000207 |
| ESRP1 | 1.241428 | 0.007692 | 0.38547 | 1.628679 | 4.31766 | 0.000315 | 0.009186 |
| EPHA4 | -1.07779 | 0.017341 | 0.490988 | -1.17289 | 5.503479 | 0.00089 | 0.017086 |
| EHF | 1.993768 | 0.011633 | 0.426201 | 2.021728 | 4.723383 | 2.03E-05 | 0.001749 |
| EGFL6 | 3.104616 | 3.43E-05 | 0.04602 | 4.014972 | 6.147509 | 3.64E-13 | 2.21E-09 |
| DMBT1 | 2.482606 | 3.07E-05 | 0.045334 | 1.500363 | 6.372513 | 9.76E-06 | 0.001135 |
| DCN | 2.18611 | 0.000645 | 0.17873 | 3.002809 | 8.72148 | 5.32E-06 | 0.00073 |
| CYP4B1 | 2.402275 | 0.000152 | 0.083395 | 2.346718 | 5.47323 | 0.000102 | 0.003603 |
| CYP2B6 | 2.157613 | 5.72E-06 | 0.020837 | 1.371325 | 5.386571 | 0.000392 | 0.010618 |
| CXCL17 | 1.254228 | 6.06E-05 | 0.060061 | 2.182569 | 5.691355 | 7.09E-07 | 0.000211 |
| CTSE | 2.350888 | 1.26E-05 | 0.028253 | 2.001825 | 5.904071 | 2.61E-05 | 0.002069 |
| CTHRC1 | 1.176869 | 0.025513 | 0.529295 | 2.001144 | 10.02838 | 4.73E-05 | 0.002968 |
| CPB2 | 1.379238 | 0.001591 | 0.239045 | 1.276593 | 3.711989 | 0.001472 | 0.023121 |
| COLEC12 | 1.517326 | 0.036366 | 0.570364 | 1.61614 | 6.044898 | 0.001943 | 0.027384 |
| COL6A6 | 1.401442 | 0.000143 | 0.101618 | 1.881613 | 4.106527 | 8.28E-06 | 0.001009 |
| COL6A3 | 1.719157 | 0.000536 | 0.177169 | 2.068304 | 10.58818 | 7.58E-06 | 0.000961 |
| COL5A1 | 1.69333 | 0.000349 | 0.145547 | 1.831366 | 7.980315 | 3.07E-05 | 0.002197 |
| COL3A1 | 1.30236 | 0.002992 | 0.280541 | 1.74406 | 10.92316 | 0.000158 | 0.005333 |
| COL1A2 | 1.122388 | 0.003546 | 0.306448 | 1.705173 | 11.17463 | 0.000247 | 0.007864 |
| COL1A1 | 1.830185 | 0.000419 | 0.154531 | 2.007091 | 9.851366 | 0.000132 | 0.004638 |
| COL11A1 | 1.831543 | 0.003352 | 0.303929 | 2.391104 | 6.499163 | 0.001111 | 0.019473 |
| COL10A1 | 1.287764 | 9.81E-05 | 0.076635 | 2.657355 | 5.520811 | 7.39E-08 | 5.36E-05 |
| CLMP | 1.35851 | 0.047344 | 0.591529 | 2.403765 | 5.319145 | 6.72E-05 | 0.003636 |
| CLIC5 | 1.299269 | 0.002109 | 0.262081 | 1.202997 | 6.48671 | 0.002394 | 0.03081 |
| CLDN18 | 1.979582 | 0.000403 | 0.127061 | 2.2868 | 5.213539 | 7.93E-05 | 0.003314 |
| CFTR | 1.024977 | 0.003217 | 0.296317 | 1.113486 | 4.630156 | 9.06E-05 | 0.004354 |
| CES1 | 1.687746 | 0.000328 | 0.144736 | 1.797718 | 6.213636 | 3.47E-05 | 0.002462 |
| CEMIP | 1.500225 | 4.89E-05 | 0.052048 | 1.540352 | 4.677742 | 0.000111 | 0.00492 |
| CEACAM6 | 2.994223 | 5.29E-06 | 0.020352 | 2.924717 | 5.260242 | 1.90E-07 | 9.02E-05 |
| CDH13 | -1.06245 | 0.001192 | 0.217263 | -1.27759 | 6.360664 | 4.51E-05 | 0.002884 |
| CCL18 | 2.588141 | 0.00079 | 0.197532 | 1.652851 | 7.919161 | 0.0033 | 0.037248 |
| CCDC80 | 1.215837 | 0.02784 | 0.539964 | 1.637023 | 7.583701 | 0.001036 | 0.018724 |
| C4BPA | 2.988209 | 1.59E-05 | 0.031076 | 2.740523 | 6.723312 | 7.33E-06 | 0.000951 |
| C1orf116 | 2.143294 | 0.004388 | 0.314733 | 2.104764 | 5.497494 | 1.08E-05 | 0.000957 |
| C16orf89 | 1.833349 | 0.000749 | 0.190916 | 1.794627 | 5.365217 | 2.27E-06 | 0.00045 |
| C14orf132 | 1.622026 | 0.005145 | 0.338945 | 1.894267 | 6.628327 | 2.97E-07 | 0.000133 |
| BDNF | -1.08948 | 0.00389 | 0.317318 | -1.10315 | 4.791685 | 0.003613 | 0.039464 |
| BCHE | 1.298943 | 0.007384 | 0.377308 | 1.973275 | 5.410825 | 0.000191 | 0.006797 |
| ATP13A4-AS1 | 1.309335 | 0.007249 | 0.375756 | 1.343711 | 3.258302 | 0.000771 | 0.015741 |
| ASPN | 1.589634 | 4.62E-05 | 0.050526 | 2.35116 | 8.470691 | 1.66E-06 | 0.000371 |
| ARHGEF26 | 1.635103 | 0.000678 | 0.190176 | 1.712266 | 5.695982 | 1.92E-05 | 0.001701 |
| AQP4 | 2.254644 | 0.000431 | 0.125382 | 2.336637 | 4.310324 | 0.000356 | 0.006874 |
| AGTR1 | -1.10328 | 0.049979 | 0.598814 | -2.00011 | 5.70124 | 0.000553 | 0.012965 |
| AGR3 | 1.463642 | 0.000202 | 0.119435 | 3.653477 | 4.598283 | 1.27E-08 | 2.04E-05 |
| AGR2 | 1.282286 | 0.000737 | 0.190916 | 2.083486 | 5.269952 | 1.28E-05 | 0.001359 |
| AGER | 1.742454 | 0.000232 | 0.129024 | 1.486491 | 5.339199 | 0.000251 | 0.00792 |
| ADH1B | 1.91566 | 0.009047 | 0.397248 | 2.222605 | 6.51325 | 0.002053 | 0.027728 |
| ADAMTS12 | 1.268962 | 1.68E-05 | 0.031676 | 1.807749 | 6.33249 | 1.71E-09 | 5.18E-06 |
| ADAM12 | 1.253908 | 0.01116 | 0.428174 | 1.452951 | 5.824971 | 0.001396 | 0.021875 |
| A1CF | -1.55767 | 0.001948 | 0.243977 | -1.79535 | 6.536406 | 0.000592 | 0.013458 |
|  | 3.436309 | 3.64E-06 | 0.01659 | 1.108475 | 3.474183 | 1.67E-05 | 0.0016 |
|  | 2.603167 | 0.00131 | 0.22523 | 2.290082 | 6.506006 | 0.003263 | 0.037236 |
|  | -1.03003 | 0.025291 | 0.528465 | -1.5116 | 5.634999 | 0.000488 | 0.012058 |

**Supplementary Table S4** The results of KEGG pathways and GO enrichment analyses for the identified 163 genes

| source | term_name | term_id | adjusted_  p_value | negative_log10_of  _adjusted_p_value | term_  size | query_  size | intersection_  size | effective_  domain_size |
| --- | --- | --- | --- | --- | --- | --- | --- | --- |
| GO:MF | extracellular matrix structural constituent | GO:0005201 | 4.19E-13 | 12.3773 | 165 | 140 | 18 | 18098 |
| GO:MF | extracellular matrix structural constituent conferring tensile strength | GO:0030020 | 5.61E-07 | 6.251151 | 41 | 140 | 8 | 18098 |
| GO:MF | platelet-derived growth factor binding | GO:0048407 | 1.36E-05 | 4.867223 | 12 | 140 | 5 | 18098 |
| GO:MF | structural molecule activity | GO:0005198 | 0.000875 | 3.057822 | 680 | 140 | 19 | 18098 |
| GO:MF | aspartic-type endopeptidase activity | GO:0004190 | 0.001033 | 2.985709 | 26 | 140 | 5 | 18098 |
| GO:MF | aspartic-type peptidase activity | GO:0070001 | 0.00126 | 2.899469 | 27 | 140 | 5 | 18098 |
| GO:MF | scavenger receptor activity | GO:0005044 | 0.038127 | 1.418768 | 53 | 140 | 5 | 18098 |
| GO:BP | extracellular matrix organization | GO:0030198 | 5.58E-12 | 11.25366 | 375 | 143 | 24 | 17847 |
| GO:BP | extracellular structure organization | GO:0043062 | 1.21E-11 | 10.91841 | 429 | 143 | 25 | 17847 |
| GO:BP | tube development | GO:0035295 | 2.10E-08 | 7.677103 | 1127 | 143 | 34 | 17847 |
| GO:BP | tissue development | GO:0009888 | 1.01E-07 | 6.996221 | 2080 | 143 | 46 | 17847 |
| GO:BP | response to growth factor | GO:0070848 | 1.59E-06 | 5.799652 | 736 | 143 | 25 | 17847 |
| GO:BP | tube morphogenesis | GO:0035239 | 2.23E-06 | 5.650762 | 934 | 143 | 28 | 17847 |
| GO:BP | cell adhesion | GO:0007155 | 2.51E-06 | 5.601134 | 1421 | 143 | 35 | 17847 |
| GO:BP | biological adhesion | GO:0022610 | 2.85E-06 | 5.544802 | 1428 | 143 | 35 | 17847 |
| GO:BP | animal organ morphogenesis | GO:0009887 | 3.11E-06 | 5.507486 | 1080 | 143 | 30 | 17847 |
| GO:BP | renal system development | GO:0072001 | 3.20E-05 | 4.495049 | 298 | 143 | 15 | 17847 |
| GO:BP | anatomical structure morphogenesis | GO:0009653 | 3.85E-05 | 4.414312 | 2764 | 143 | 49 | 17847 |
| GO:BP | cell-substrate adhesion | GO:0031589 | 4.20E-05 | 4.376981 | 351 | 143 | 16 | 17847 |
| GO:BP | vasculature development | GO:0001944 | 4.52E-05 | 4.344964 | 805 | 143 | 24 | 17847 |
| GO:BP | cardiovascular system development | GO:0072358 | 5.58E-05 | 4.253366 | 814 | 143 | 24 | 17847 |
| GO:BP | anatomical structure development | GO:0048856 | 7.48E-05 | 4.126238 | 6028 | 143 | 80 | 17847 |
| GO:BP | cellular response to growth factor stimulus | GO:0071363 | 8.81E-05 | 4.054886 | 707 | 143 | 22 | 17847 |
| GO:BP | blood vessel development | GO:0001568 | 8.88E-05 | 4.051441 | 770 | 143 | 23 | 17847 |
| GO:BP | multicellular organism development | GO:0007275 | 0.000132 | 3.879269 | 5532 | 143 | 75 | 17847 |
| GO:BP | developmental process | GO:0032502 | 0.000134 | 3.871489 | 6449 | 143 | 83 | 17847 |
| GO:BP | respiratory system development | GO:0060541 | 0.000145 | 3.837846 | 201 | 143 | 12 | 17847 |
| GO:BP | urogenital system development | GO:0001655 | 0.000156 | 3.807542 | 336 | 143 | 15 | 17847 |
| GO:BP | digestive tract development | GO:0048565 | 0.00023 | 3.63762 | 134 | 143 | 10 | 17847 |
| GO:BP | regulation of cell-substrate adhesion | GO:0010810 | 0.000235 | 3.629845 | 210 | 143 | 12 | 17847 |
| GO:BP | lung development | GO:0030324 | 0.000307 | 3.512778 | 175 | 143 | 11 | 17847 |
| GO:BP | circulatory system development | GO:0072359 | 0.000345 | 3.462641 | 1181 | 143 | 28 | 17847 |
| GO:BP | respiratory tube development | GO:0030323 | 0.000386 | 3.413461 | 179 | 143 | 11 | 17847 |
| GO:BP | response to endogenous stimulus | GO:0009719 | 0.0004 | 3.397837 | 1736 | 143 | 35 | 17847 |
| GO:BP | collagen fibril organization | GO:0030199 | 0.000438 | 3.358459 | 54 | 143 | 7 | 17847 |
| GO:BP | digestive system development | GO:0055123 | 0.000515 | 3.287981 | 146 | 143 | 10 | 17847 |
| GO:BP | cell migration | GO:0016477 | 0.000557 | 3.254221 | 1597 | 143 | 33 | 17847 |
| GO:BP | epithelium development | GO:0060429 | 0.000662 | 3.178815 | 1295 | 143 | 29 | 17847 |
| GO:BP | cellular response to endogenous stimulus | GO:0071495 | 0.000832 | 3.079941 | 1465 | 143 | 31 | 17847 |
| GO:BP | movement of cell or subcellular component | GO:0006928 | 0.000858 | 3.066411 | 2221 | 143 | 40 | 17847 |
| GO:BP | kidney development | GO:0001822 | 0.000859 | 3.066068 | 283 | 143 | 13 | 17847 |
| GO:BP | tissue morphogenesis | GO:0048729 | 0.000874 | 3.058687 | 677 | 143 | 20 | 17847 |
| GO:BP | anatomical structure formation involved in morphogenesis | GO:0048646 | 0.001339 | 2.873249 | 1187 | 143 | 27 | 17847 |
| GO:BP | localization of cell | GO:0051674 | 0.001518 | 2.818721 | 1752 | 143 | 34 | 17847 |
| GO:BP | cell motility | GO:0048870 | 0.001518 | 2.818721 | 1752 | 143 | 34 | 17847 |
| GO:BP | skeletal system development | GO:0001501 | 0.00192 | 2.716775 | 524 | 143 | 17 | 17847 |
| GO:BP | enzyme linked receptor protein signaling pathway | GO:0007167 | 0.001989 | 2.701473 | 1062 | 143 | 25 | 17847 |
| GO:BP | response to external stimulus | GO:0009605 | 0.002973 | 2.526735 | 2887 | 143 | 46 | 17847 |
| GO:BP | locomotion | GO:0040011 | 0.00323 | 2.490812 | 1983 | 143 | 36 | 17847 |
| GO:BP | response to organic substance | GO:0010033 | 0.003433 | 2.464316 | 3388 | 143 | 51 | 17847 |
| GO:BP | multicellular organismal process | GO:0032501 | 0.00415 | 2.381913 | 7775 | 143 | 90 | 17847 |
| GO:BP | blood vessel morphogenesis | GO:0048514 | 0.0048 | 2.318716 | 689 | 143 | 19 | 17847 |
| GO:BP | animal organ development | GO:0048513 | 0.005183 | 2.285397 | 3635 | 143 | 53 | 17847 |
| GO:BP | regulation of response to external stimulus | GO:0032101 | 0.005344 | 2.272096 | 1122 | 143 | 25 | 17847 |
| GO:BP | regulation of body fluid levels | GO:0050878 | 0.005391 | 2.268341 | 504 | 143 | 16 | 17847 |
| GO:BP | regulation of cell adhesion | GO:0030155 | 0.005562 | 2.254798 | 696 | 143 | 19 | 17847 |
| GO:BP | cellular response to chemical stimulus | GO:0070887 | 0.006708 | 2.173414 | 3364 | 143 | 50 | 17847 |
| GO:BP | cellular response to organic substance | GO:0071310 | 0.007208 | 2.14218 | 2788 | 143 | 44 | 17847 |
| GO:BP | system development | GO:0048731 | 0.008845 | 2.053281 | 4967 | 143 | 65 | 17847 |
| GO:BP | cellular response to acid chemical | GO:0071229 | 0.015793 | 1.801528 | 213 | 143 | 10 | 17847 |
| GO:BP | morphogenesis of an epithelium | GO:0002009 | 0.015904 | 1.798485 | 549 | 143 | 16 | 17847 |
| GO:BP | response to wounding | GO:0009611 | 0.020028 | 1.69837 | 692 | 143 | 18 | 17847 |
| GO:BP | epithelial cell differentiation | GO:0030855 | 0.023951 | 1.620682 | 771 | 143 | 19 | 17847 |
| GO:BP | regulation of developmental process | GO:0050793 | 0.024743 | 1.606555 | 2729 | 143 | 42 | 17847 |
| GO:BP | epithelial tube morphogenesis | GO:0060562 | 0.026413 | 1.578188 | 330 | 143 | 12 | 17847 |
| GO:BP | wound healing | GO:0042060 | 0.028825 | 1.540231 | 576 | 143 | 16 | 17847 |
| GO:BP | cell differentiation | GO:0030154 | 0.031701 | 1.498923 | 4279 | 143 | 57 | 17847 |
| GO:BP | metanephric nephron development | GO:0072210 | 0.033875 | 1.470127 | 41 | 143 | 5 | 17847 |
| GO:BP | regulation of anatomical structure morphogenesis | GO:0022603 | 0.034647 | 1.460336 | 1170 | 143 | 24 | 17847 |
| GO:BP | epithelial to mesenchymal transition | GO:0001837 | 0.035134 | 1.454271 | 142 | 143 | 8 | 17847 |
| GO:BP | chemotaxis | GO:0006935 | 0.035468 | 1.450166 | 653 | 143 | 17 | 17847 |
| GO:BP | taxis | GO:0042330 | 0.036879 | 1.433221 | 655 | 143 | 17 | 17847 |
| GO:BP | response to chemical | GO:0042221 | 0.03719 | 1.429578 | 4841 | 143 | 62 | 17847 |
| GO:BP | regulation of cell motility | GO:2000145 | 0.037219 | 1.429239 | 1019 | 143 | 22 | 17847 |
| GO:BP | cellular response to amino acid stimulus | GO:0071230 | 0.03794 | 1.420907 | 70 | 143 | 6 | 17847 |
| GO:BP | transmembrane receptor protein tyrosine kinase signaling pathway | GO:0007169 | 0.043249 | 1.364022 | 733 | 143 | 18 | 17847 |
| GO:BP | regulation of cellular component movement | GO:0051270 | 0.043341 | 1.363103 | 1107 | 143 | 23 | 17847 |
| GO:BP | positive regulation of developmental process | GO:0051094 | 0.04374 | 1.359122 | 1432 | 143 | 27 | 17847 |
| GO:BP | regulation of localization | GO:0032879 | 0.044767 | 1.349038 | 2893 | 143 | 43 | 17847 |
| GO:BP | regulation of cell migration | GO:0030334 | 0.04624 | 1.334984 | 957 | 143 | 21 | 17847 |
| GO:BP | response to acid chemical | GO:0001101 | 0.048588 | 1.313474 | 351 | 143 | 12 | 17847 |
| KEGG | Protein digestion and absorption | KEGG:04974 | 1.30E-05 | 4.886737 | 95 | 71 | 9 | 7772 |
| KEGG | AGE-RAGE signaling pathway in diabetic complications | KEGG:04933 | 0.002511 | 2.600079 | 100 | 71 | 7 | 7772 |
| KEGG | ECM-receptor interaction | KEGG:04512 | 0.011044 | 1.956866 | 88 | 71 | 6 | 7772 |
| KEGG | Focal adhesion | KEGG:04510 | 0.032454 | 1.488738 | 198 | 71 | 8 | 7772 |

**Supplementary Table S5** The subnetwork 1 was composed of 18 modules

| **Module** | **Size** | **Query** | **P-value** |
| --- | --- | --- | --- |
| 0 | 43 | 7 | 9.04E-09 |
| 1 | 67 | 4 | 6.95E-25 |
| 2 | 11 | 4 | 0.00682 |
| 3 | 19 | 2 | 5.86E-07 |
| 4 | 40 | 1 | 3.39E-15 |
| 5 | 39 | 1 | 5.94E-15 |
| 6 | 36 | 1 | 1.77E-11 |
| 7 | 37 | 1 | 1.3E-08 |
| 8 | 17 | 1 | 0.0000033 |
| 9 | 16 | 1 | 0.000111 |
| 10 | 10 | 1 | 0.000124 |
| 11 | 10 | 1 | 0.000124 |
| 12 | 23 | 1 | 0.000126 |
| 13 | 9 | 1 | 0.00188 |
| 14 | 7 | 1 | 0.0027 |
| 15 | 5 | 1 | 0.0209 |
| 16 | 7 | 1 | 0.0357 |
| 17 | 5 | 1 | 0.0558 |

**Supplementary Table S6** The detail information of in all subnetworks of the identified 163 genes

| **Networks** | **Nodes** | **Edges** | **Seeds** |
| --- | --- | --- | --- |
| subnetwork1 | 412 | 484 | 35 |
| subnetwork2 | 17 | 17 | 3 |
| subnetwork3 | 17 | 16 | 1 |
| subnetwork4 | 17 | 18 | 2 |
| subnetwork5 | 10 | 10 | 3 |
| subnetwork6 | 8 | 7 | 1 |
| subnetwork7 | 7 | 6 | 1 |
| subnetwork8 | 6 | 5 | 1 |
| subnetwork9 | 5 | 4 | 1 |
| subnetwork10 | 5 | 4 | 1 |
| subnetwork11 | 5 | 4 | 1 |
| subnetwork12 | 5 | 4 | 1 |
| subnetwork13 | 4 | 3 | 2 |
| subnetwork14 | 4 | 3 | 1 |
| subnetwork15 | 4 | 3 | 1 |
| subnetwork16 | 4 | 3 | 1 |
| subnetwork17 | 3 | 2 | 1 |
| subnetwork18 | 3 | 2 | 1 |
| subnetwork19 | 3 | 2 | 1 |
| subnetwork20 | 3 | 2 | 1 |
| subnetwork21 | 3 | 2 | 1 |

**Supplementary Table S7** The information of all hub genes and their degrees

| Id | Gene | Degree | Betweenness | Expression | subnetwork |
| --- | --- | --- | --- | --- | --- |
| ENSP00000257290 | PDGFRA | 57 | 24071.2 | 1.933658011 | subnetwork1 |
| ENSP00000264634 | WNT5A | 55 | 27522.6 | 1.293119727 | subnetwork1 |
| ENSP00000003084 | CFTR | 45 | 17980.6 | 1.024977362 | subnetwork1 |
| ENSP00000340989 | SFN | 43 | 19285.7 | 1.591295356 | subnetwork1 |
| ENSP00000340820 | MAPT | 40 | 16454.7 | -1.08828523 | subnetwork1 |
| ENSP00000052754 | DCN | 24 | 10179.3 | 2.186110313 | subnetwork1 |
| ENSP00000281821 | EPHA4 | 23 | 14088.7 | -1.07778915 | subnetwork1 |
| ENSP00000219070 | MMP2 | 23 | 9527.05 | 1.526283442 | subnetwork1 |
| ENSP00000283249 | ITGB6 | 20 | 6659.9 | 1.827146821 | subnetwork1 |
| ENSP00000410715 | SFRP4 | 19 | 4845.39 | 1.009466304 | subnetwork1 |
| ENSP00000225964 | COL1A1 | 18 | 16395.4 | 1.830184528 | subnetwork1 |
| ENSP00000422591 | SLIT2 | 17 | 8343.13 | 1.238910729 | subnetwork1 |
| ENSP00000419952 | KCNAB1 | 16 | 120 | -1.3231804 | subnetwork3 |
| ENSP00000269216 | GATA6 | 13 | 7619.23 | 1.134265863 | subnetwork1 |
| ENSP00000297268 | COL1A2 | 12 | 2230.76 | 1.122387941 | subnetwork1 |
| ENSP00000310661 | PDE7B | 12 | 100.5 | -1.01353366 | subnetwork4 |
| ENSP00000346879 | NKX2-1 | 10 | 3654 | 1.898304258 | subnetwork1 |
| ENSP00000244043 | PTGIS | 10 | 99 | 1.228115904 | subnetwork2 |
| ENSP00000348170 | HP | 9 | 3252 | 1.961898027 | subnetwork1 |
| ENSP00000344818 | UBC | 8 | 5696.92 | 0 | subnetwork1 |
| ENSP00000309913 | TBX5 | 8 | 2950.22 | 1.185076525 | subnetwork1 |
| ENSP00000353292 | SCNN1A | 8 | 2110.9 | 1.461335737 | subnetwork1 |
| ENSP00000336829 | FGG | 7 | 2445 | 2.917457389 | subnetwork1 |
| ENSP00000272190 | REN | 7 | 21 | -2.09515617 | subnetwork6 |
| ENSP00000335153 | HSP90AA1 | 6 | 17759.7 | 0 | subnetwork1 |
| ENSP00000354652 | NPY1R | 6 | 43.5 | -1.86365437 | subnetwork4 |
| ENSP00000400365 | LAMA2 | 6 | 30 | 1.122657473 | subnetwork5 |
| ENSP00000414303 | BDNF | 6 | 15 | -1.08948145 | subnetwork7 |
| ENSP00000221930 | TGFB1 | 5 | 3639.97 | 0 | subnetwork1 |
| ENSP00000357668 | ADAM12 | 5 | 1307.98 | 1.253908386 | subnetwork1 |
| ENSP00000260356 | THBS1 | 5 | 610.75 | 0 | subnetwork1 |
| ENSP00000286574 | WIF1 | 5 | 13.83 | 2.790162105 | subnetwork1 |
| ENSP00000324648 | CYP2B6 | 5 | 62.5 | 2.157613234 | subnetwork2 |
| ENSP00000264605 | MLPH | 5 | 10 | 1.000154276 | subnetwork8 |
| ENSP00000361423 | ABL1 | 4 | 8199.68 | 0 | subnetwork1 |
| ENSP00000346839 | FN1 | 4 | 4595.79 | 0 | subnetwork1 |
| ENSP00000331544 | FBLN1 | 4 | 1227 | 1.385309407 | subnetwork1 |
| ENSP00000266718 | LUM | 4 | 572.89 | 2.458447844 | subnetwork1 |
| ENSP00000231061 | SPARC | 4 | 196.32 | 0 | subnetwork1 |
| ENSP00000319623 | IGDCC4 | 4 | 6 | 2.128927996 | subnetwork9 |
| ENSP00000337501 | NRIP2 | 4 | 6 | -1.20477227 | subnetwork10 |
| ENSP00000251020 | SALL1 | 4 | 6 | -1.10304581 | subnetwork11 |
| ENSP00000334145 | F3 | 4 | 6 | 2.073770772 | subnetwork12 |
| ENSP00000368104 | BMP2 | 3 | 10826 | 0 | subnetwork1 |
| ENSP00000329357 | SP1 | 3 | 10635.4 | 0 | subnetwork1 |
| ENSP00000261023 | ITGAV | 3 | 3455.9 | 0 | subnetwork1 |
| ENSP00000350941 | SRC | 3 | 2271.1 | 0 | subnetwork1 |
| ENSP00000383199 | NEDD4L | 3 | 1921.42 | 0 | subnetwork1 |
| ENSP00000261799 | PDGFRB | 3 | 1151.14 | 0 | subnetwork1 |
| ENSP00000376822 | STEAP3 | 3 | 819 | 1.509069781 | subnetwork1 |
| ENSP00000295731 | IHH | 3 | 593.73 | 0 | subnetwork1 |
| ENSP00000297261 | SHH | 3 | 593.73 | 0 | subnetwork1 |
| ENSP00000296575 | HHIP | 3 | 410.33 | 1.77524448 | subnetwork1 |
| ENSP00000360882 | COL5A1 | 3 | 7.47 | 1.693330101 | subnetwork1 |
| ENSP00000312435 | DAG1 | 3 | 18.5 | 0 | subnetwork5 |
| ENSP00000372654 | AQP4 | 3 | 3 | 2.254644239 | subnetwork14 |
| ENSP00000356037 | C4BPA | 3 | 3 | 2.988208919 | subnetwork15 |
| ENSP00000267842 | SLC27A2 | 3 | 3 | -1.64695763 | subnetwork16 |
| ENSP00000324740 | YES1 | 2 | 8313.62 | 0 | subnetwork1 |
| ENSP00000364694 | ASPN | 2 | 7936.56 | 1.589633545 | subnetwork1 |
| ENSP00000348461 | RAC1 | 2 | 4313.55 | 0 | subnetwork1 |
| ENSP00000252486 | APOE | 2 | 3618 | 0 | subnetwork1 |
| ENSP00000264033 | CBL | 2 | 1979.4 | 0 | subnetwork1 |
| ENSP00000262613 | SLC9A3R1 | 2 | 1979.4 | 0 | subnetwork1 |
| ENSP00000341189 | PTK2 | 2 | 1883.57 | 0 | subnetwork1 |
| ENSP00000419782 | CDK5 | 2 | 1667 | 0 | subnetwork1 |
| ENSP00000346671 | FYN | 2 | 1667 | 0 | subnetwork1 |
| ENSP00000264187 | NID1 | 2 | 1628 | 0 | subnetwork1 |
| ENSP00000275493 | EGFR | 2 | 1560.67 | 0 | subnetwork1 |
| ENSP00000330382 | PDGFB | 2 | 1525.4 | 0 | subnetwork1 |
| ENSP00000216373 | SOS2 | 2 | 1444.75 | 0 | subnetwork1 |
| ENSP00000384675 | SOS1 | 2 | 1444.75 | 0 | subnetwork1 |
| ENSP00000309845 | HRAS | 2 | 1252.62 | 0 | subnetwork1 |
| ENSP00000358548 | NRAS | 2 | 1252.62 | 0 | subnetwork1 |
| ENSP00000215368 | EFNA2 | 2 | 1037.77 | 0 | subnetwork1 |
| ENSP00000414378 | EFNA4 | 2 | 1037.77 | 0 | subnetwork1 |
| ENSP00000328777 | EFNA5 | 2 | 1037.77 | 0 | subnetwork1 |
| ENSP00000357392 | EFNA1 | 2 | 1037.77 | 0 | subnetwork1 |
| ENSP00000293379 | ITGA5 | 2 | 963.79 | 0 | subnetwork1 |
| ENSP00000251849 | RAF1 | 2 | 818 | 0 | subnetwork1 |
| ENSP00000261349 | LRP6 | 2 | 818 | 0 | subnetwork1 |
| ENSP00000238081 | YWHAQ | 2 | 721.5 | 0 | subnetwork1 |
| ENSP00000270202 | AKT1 | 2 | 721.5 | 0 | subnetwork1 |
| ENSP00000309503 | YWHAZ | 2 | 721.5 | 0 | subnetwork1 |
| ENSP00000421689 | CSNK1A1 | 2 | 721.5 | 0 | subnetwork1 |
| ENSP00000219548 | STUB1 | 2 | 704.79 | 0 | subnetwork1 |
| ENSP00000227378 | HSPA8 | 2 | 704.79 | 0 | subnetwork1 |
| ENSP00000302961 | HSPA4 | 2 | 704.79 | 0 | subnetwork1 |
| ENSP00000309591 | PRKACA | 2 | 704.79 | 0 | subnetwork1 |
| ENSP00000364898 | SYK | 2 | 704.79 | 0 | subnetwork1 |
| ENSP00000334458 | GATA4 | 2 | 636.79 | 0 | subnetwork1 |
| ENSP00000370473 | IGFBP3 | 2 | 493.71 | 0 | subnetwork1 |
| ENSP00000265428 | WWP1 | 2 | 442.8 | 0 | subnetwork1 |
| ENSP00000345530 | NEDD4 | 2 | 442.8 | 0 | subnetwork1 |
| ENSP00000254722 | SERPINF1 | 2 | 410 | 1.161021194 | subnetwork1 |
| ENSP00000256404 | PEBP4 | 2 | 410 | 1.429775896 | subnetwork1 |
| ENSP00000278282 | SCGB1A1 | 2 | 410 | 1.913163453 | subnetwork1 |
| ENSP00000262407 | ITGA2B | 2 | 187.36 | 0 | subnetwork1 |
| ENSP00000225512 | WNT3 | 2 | 154.52 | 0 | subnetwork1 |
| ENSP00000341032 | WNT7B | 2 | 154.52 | 0 | subnetwork1 |
| ENSP00000351209 | EPHA2 | 2 | 146.41 | 0 | subnetwork1 |
| ENSP00000358698 | WNT2B | 2 | 95.5 | 0 | subnetwork1 |
| ENSP00000264828 | COL5A3 | 2 | 13.9 | 0 | subnetwork1 |
| ENSP00000285018 | WNT7A | 2 | 10.85 | 0 | subnetwork1 |
| ENSP00000293549 | WNT1 | 2 | 10.85 | 0 | subnetwork1 |
| ENSP00000325526 | WNT11 | 2 | 10.85 | 0 | subnetwork1 |
| ENSP00000387356 | ACAN | 2 | 7.17 | 0 | subnetwork1 |
| ENSP00000308208 | MMP14 | 2 | 7.17 | 0 | subnetwork1 |
| ENSP00000304408 | COL3A1 | 2 | 0.33 | 1.302359724 | subnetwork1 |
| ENSP00000233948 | WNT6 | 2 | 0 | 0 | subnetwork1 |
| ENSP00000272164 | WNT9A | 2 | 0 | 0 | subnetwork1 |
| ENSP00000290015 | WNT9B | 2 | 0 | 0 | subnetwork1 |
| ENSP00000296585 | ITGA2 | 2 | 0 | 0 | subnetwork1 |
| ENSP00000340677 | WNT8B | 2 | 0 | 0 | subnetwork1 |
| ENSP00000381739 | WNT8A | 2 | 0 | 0 | subnetwork1 |
| ENSP00000327801 | P4HB | 2 | 0 | 0 | subnetwork1 |
| ENSP00000398632 | CD44 | 2 | 0 | 0 | subnetwork1 |
| ENSP00000307607 | SDR16C5 | 2 | 0.5 | 2.275514869 | subnetwork2 |
| ENSP00000220584 | FDFT1 | 2 | 60 | 0 | subnetwork2 |
| ENSP00000249750 | ALDH1A2 | 2 | 7 | 0 | subnetwork2 |
| ENSP00000297785 | ALDH1A1 | 2 | 7 | 0 | subnetwork2 |
| ENSP00000343027 | GNAI1 | 2 | 13.33 | 0 | subnetwork4 |
| ENSP00000381339 | GNAT3 | 2 | 13.33 | 0 | subnetwork4 |
| ENSP00000358867 | GNAI3 | 2 | 13.33 | 0 | subnetwork4 |
| ENSP00000308606 | AGR3 | 2 | 3.5 | 1.46364156 | subnetwork5 |
| ENSP00000391490 | AGR2 | 2 | 3.5 | 1.282285579 | subnetwork5 |
| ENSP00000244333 | LYPD3 | 2 | 0.5 | 0 | subnetwork5 |
| ENSP00000265354 | SRF | 2 | 2 | 0 | subnetwork13 |
| ENSP00000450527 | HOPX | 2 | 2 | 1.411925304 | subnetwork13 |
| ENSP00000199764 | CEACAM6 | 2 | 1 | 2.994223371 | subnetwork17 |
| ENSP00000181383 | CPB2 | 2 | 1 | 1.379238345 | subnetwork18 |
| ENSP00000183605 | CLDN18 | 2 | 1 | 1.979582199 | subnetwork19 |
| ENSP00000259806 | FOXF2 | 2 | 1 | 1.533285766 | subnetwork20 |
| ENSP00000397082 | SFTPA1 | 2 | 1 | 5.50933785 | subnetwork21 |
| ENSP00000005340 | DVL2 | 1 | 0 | 0 | subnetwork1 |
| ENSP00000012443 | PPP5C | 1 | 0 | 0 | subnetwork1 |
| ENSP00000014914 | GPRC5A | 1 | 0 | 2.462083644 | subnetwork1 |
| ENSP00000204961 | EFNB1 | 1 | 0 | 0 | subnetwork1 |
| ENSP00000215832 | MAPK1 | 1 | 0 | 0 | subnetwork1 |
| ENSP00000217086 | SALL4 | 1 | 0 | 0 | subnetwork1 |
| ENSP00000218388 | TIMP1 | 1 | 0 | 0 | subnetwork1 |
| ENSP00000219476 | TSC2 | 1 | 0 | 0 | subnetwork1 |
| ENSP00000220772 | SFRP1 | 1 | 0 | 0 | subnetwork1 |
| ENSP00000222330 | GSK3A | 1 | 0 | 0 | subnetwork1 |
| ENSP00000222462 | WNT16 | 1 | 0 | 0 | subnetwork1 |
| ENSP00000225577 | RPS6KB1 | 1 | 0 | 0 | subnetwork1 |
| ENSP00000225983 | HDAC5 | 1 | 0 | 0 | subnetwork1 |
| ENSP00000226091 | EFNB3 | 1 | 0 | 0 | subnetwork1 |
| ENSP00000228682 | GLI1 | 1 | 0 | 0 | subnetwork1 |
| ENSP00000229030 | FZD10 | 1 | 0 | 0 | subnetwork1 |
| ENSP00000229922 | CAP2 | 1 | 0 | 0 | subnetwork1 |
| ENSP00000230419 | PTK7 | 1 | 0 | 0 | subnetwork1 |
| ENSP00000231656 | CDX1 | 1 | 0 | 0 | subnetwork1 |
| ENSP00000236850 | APOA1 | 1 | 0 | 0 | subnetwork1 |
| ENSP00000240093 | FZD3 | 1 | 0 | 0 | subnetwork1 |
| ENSP00000244007 | PLCG1 | 1 | 0 | 0 | subnetwork1 |
| ENSP00000245323 | EFNB2 | 1 | 0 | 0 | subnetwork1 |
| ENSP00000245451 | BMP4 | 1 | 0 | 0 | subnetwork1 |
| ENSP00000245932 | VASP | 1 | 0 | 0 | subnetwork1 |
| ENSP00000245960 | CDC25B | 1 | 0 | 0 | subnetwork1 |
| ENSP00000247970 | PIN1 | 1 | 0 | 0 | subnetwork1 |
| ENSP00000248437 | TUBA4A | 1 | 0 | 0 | subnetwork1 |
| ENSP00000250615 | AANAT | 1 | 0 | 0 | subnetwork1 |
| ENSP00000251595 | HBA2 | 1 | 0 | 0 | subnetwork1 |
| ENSP00000252699 | ACTN4 | 1 | 0 | 0 | subnetwork1 |
| ENSP00000254066 | RARA | 1 | 0 | 0 | subnetwork1 |
| ENSP00000254325 | RFX1 | 1 | 0 | 0 | subnetwork1 |
| ENSP00000254958 | JAG1 | 1 | 0 | 0 | subnetwork1 |
| ENSP00000256151 | CCDC59 | 1 | 0 | 0 | subnetwork1 |
| ENSP00000256442 | CCNB1 | 1 | 0 | 0 | subnetwork1 |
| ENSP00000256646 | NOTCH2 | 1 | 0 | 0 | subnetwork1 |
| ENSP00000258411 | WNT10A | 1 | 0 | 0 | subnetwork1 |
| ENSP00000260187 | USP2 | 1 | 0 | 0 | subnetwork1 |
| ENSP00000262188 | SMARCD3 | 1 | 0 | 0 | subnetwork1 |
| ENSP00000262320 | AXIN1 | 1 | 0 | 0 | subnetwork1 |
| ENSP00000262367 | CREBBP | 1 | 0 | 0 | subnetwork1 |
| ENSP00000262891 | MARK4 | 1 | 0 | 0 | subnetwork1 |
| ENSP00000263025 | MAPK3 | 1 | 0 | 0 | subnetwork1 |
| ENSP00000263388 | NOTCH3 | 1 | 0 | 0 | subnetwork1 |
| ENSP00000263754 | KAT2B | 1 | 0 | 0 | subnetwork1 |
| ENSP00000264039 | GPC1 | 1 | 0 | 0 | subnetwork1 |
| ENSP00000264051 | NGEF | 1 | 0 | 0 | subnetwork1 |
| ENSP00000264741 | ITGA9 | 1 | 0 | 0 | subnetwork1 |
| ENSP00000264832 | ICAM1 | 1 | 0 | 0 | subnetwork1 |
| ENSP00000264870 | F13A1 | 1 | 0 | 0 | subnetwork1 |
| ENSP00000265077 | VCAN | 1 | 0 | 0 | subnetwork1 |
| ENSP00000265171 | EGF | 1 | 0 | 0 | subnetwork1 |
| ENSP00000265441 | WNT2 | 1 | 0 | 0 | subnetwork1 |
| ENSP00000266991 | DHH | 1 | 0 | 0 | subnetwork1 |
| ENSP00000269305 | TP53 | 1 | 0 | 0 | subnetwork1 |
| ENSP00000270162 | SIK1 | 1 | 0 | 0 | subnetwork1 |
| ENSP00000272317 | RPS27A | 1 | 0 | 0 | subnetwork1 |
| ENSP00000275815 | EPHA1 | 1 | 0 | 0 | subnetwork1 |
| ENSP00000281171 | PTPRO | 1 | 0 | 0 | subnetwork1 |
| ENSP00000284523 | WNT3A | 1 | 0 | 0 | subnetwork1 |
| ENSP00000284981 | APP | 1 | 0 | 0 | subnetwork1 |
| ENSP00000288207 | CCNB2 | 1 | 0 | 0 | subnetwork1 |
| ENSP00000288602 | BRAF | 1 | 0 | 0 | subnetwork1 |
| ENSP00000290167 | WNT4 | 1 | 0 | 0 | subnetwork1 |
| ENSP00000290524 | RFX5 | 1 | 0 | 0 | subnetwork1 |
| ENSP00000291700 | S100B | 1 | 0 | 0 | subnetwork1 |
| ENSP00000295897 | ALB | 1 | 0 | 0 | subnetwork1 |
| ENSP00000296474 | MST1R | 1 | 0 | 0 | subnetwork1 |
| ENSP00000298552 | TSC1 | 1 | 0 | 0 | subnetwork1 |
| ENSP00000298838 | PACSIN3 | 1 | 0 | 0 | subnetwork1 |
| ENSP00000298910 | LRRK2 | 1 | 0 | 0 | subnetwork1 |
| ENSP00000300061 | SCNN1G | 1 | 0 | 0 | subnetwork1 |
| ENSP00000301061 | WNT10B | 1 | 0 | 0 | subnetwork1 |
| ENSP00000301653 | KRT16 | 1 | 0 | 0 | subnetwork1 |
| ENSP00000302913 | SH3D19 | 1 | 0 | 0 | subnetwork1 |
| ENSP00000304945 | ROBO4 | 1 | 0 | 0 | subnetwork1 |
| ENSP00000306099 | FGB | 1 | 0 | 0 | subnetwork1 |
| ENSP00000306330 | YWHAG | 1 | 0 | 0 | subnetwork1 |
| ENSP00000306361 | FGA | 1 | 0 | 0 | subnetwork1 |
| ENSP00000308887 | WNT5B | 1 | 0 | 0 | subnetwork1 |
| ENSP00000309103 | BAD | 1 | 0 | 0 | subnetwork1 |
| ENSP00000311032 | CASP3 | 1 | 0 | 0 | subnetwork1 |
| ENSP00000314458 | CDC42 | 1 | 0 | 0 | subnetwork1 |
| ENSP00000316779 | BIN1 | 1 | 0 | 0 | subnetwork1 |
| ENSP00000320866 | CALR | 1 | 0 | 0 | subnetwork1 |
| ENSP00000320940 | NCOA1 | 1 | 0 | 0 | subnetwork1 |
| ENSP00000321656 | CDC25C | 1 | 0 | 0 | subnetwork1 |
| ENSP00000322421 | HBA1 | 1 | 0 | 0 | subnetwork1 |
| ENSP00000323889 | TRIM25 | 1 | 0 | 0 | subnetwork1 |
| ENSP00000324464 | CSNK1D | 1 | 0 | 0 | subnetwork1 |
| ENSP00000324806 | GSK3B | 1 | 0 | 0 | subnetwork1 |
| ENSP00000326366 | PSEN1 | 1 | 0 | 0 | subnetwork1 |
| ENSP00000329243 | KRT7 | 1 | 0 | 1.831155333 | subnetwork1 |
| ENSP00000331678 | PKP3 | 1 | 0 | 0 | subnetwork1 |
| ENSP00000332773 | IGDCC3 | 1 | 0 | 0 | subnetwork1 |
| ENSP00000333994 | HBB | 1 | 0 | 0 | subnetwork1 |
| ENSP00000338345 | SNCA | 1 | 0 | 0 | subnetwork1 |
| ENSP00000339527 | FOXO3 | 1 | 0 | 0 | subnetwork1 |
| ENSP00000345751 | SCNN1B | 1 | 0 | 0 | subnetwork1 |
| ENSP00000355809 | ENAH | 1 | 0 | 0 | subnetwork1 |
| ENSP00000361878 | CAP1 | 1 | 0 | 0 | subnetwork1 |
| ENSP00000370003 | BNIP3L | 1 | 0 | 0 | subnetwork1 |
| ENSP00000380903 | ROBO3 | 1 | 0 | 0 | subnetwork1 |
| ENSP00000417335 | ROBO2 | 1 | 0 | 0 | subnetwork1 |
| ENSP00000420321 | ROBO1 | 1 | 0 | 0 | subnetwork1 |
| ENSP00000273047 | RAB5A | 1 | 0 | 0 | subnetwork1 |
| ENSP00000295736 | SLC4A7 | 1 | 0 | 0 | subnetwork1 |
| ENSP00000219919 | AQP9 | 1 | 0 | 0 | subnetwork1 |
| ENSP00000346148 | PRKAA1 | 1 | 0 | 0 | subnetwork1 |
| ENSP00000363092 | PRKG1 | 1 | 0 | 0 | subnetwork1 |
| ENSP00000290649 | AMFR | 1 | 0 | 0 | subnetwork1 |
| ENSP00000297814 | KIF27 | 1 | 0 | 0 | subnetwork1 |
| ENSP00000405812 | SLC4A8 | 1 | 0 | 0 | subnetwork1 |
| ENSP00000261890 | RAB11A | 1 | 0 | 0 | subnetwork1 |
| ENSP00000347742 | PDZD3 | 1 | 0 | 0 | subnetwork1 |
| ENSP00000265563 | PRKAR2A | 1 | 0 | 0 | subnetwork1 |
| ENSP00000385450 | MAGI1 | 1 | 0 | 0 | subnetwork1 |
| ENSP00000420381 | CALU | 1 | 0 | 0 | subnetwork1 |
| ENSP00000216479 | AHSA1 | 1 | 0 | 0 | subnetwork1 |
| ENSP00000297988 | AQP7 | 1 | 0 | 0 | subnetwork1 |
| ENSP00000265717 | PRKAR2B | 1 | 0 | 0 | subnetwork1 |
| ENSP00000341682 | SLC26A9 | 1 | 0 | 0 | subnetwork1 |
| ENSP00000249647 | SNAP23 | 1 | 0 | 0 | subnetwork1 |
| ENSP00000357484 | GOPC | 1 | 0 | 0 | subnetwork1 |
| ENSP00000345575 | DNAJB12 | 1 | 0 | 0 | subnetwork1 |
| ENSP00000261514 | CLCN3 | 1 | 0 | 0 | subnetwork1 |
| ENSP00000374455 | SQSTM1 | 1 | 0 | 0 | subnetwork1 |
| ENSP00000351777 | VCP | 1 | 0 | 0 | subnetwork1 |
| ENSP00000259512 | DERL1 | 1 | 0 | 0 | subnetwork1 |
| ENSP00000408005 | SLC9A3R2 | 1 | 0 | 0 | subnetwork1 |
| ENSP00000308236 | COMMD1 | 1 | 0 | 0 | subnetwork1 |
| ENSP00000376432 | KCNJ1 | 1 | 0 | 0 | subnetwork1 |
| ENSP00000247461 | CANX | 1 | 0 | 0 | subnetwork1 |
| ENSP00000378920 | SLC26A6 | 1 | 0 | 0 | subnetwork1 |
| ENSP00000347454 | ANO1 | 1 | 0 | 0 | subnetwork1 |
| ENSP00000338934 | EZR | 1 | 0 | 0 | subnetwork1 |
| ENSP00000324173 | HSPA5 | 1 | 0 | 0 | subnetwork1 |
| ENSP00000364235 | RNF5 | 1 | 0 | 0 | subnetwork1 |
| ENSP00000369127 | DNAJA1 | 1 | 0 | 0 | subnetwork1 |
| ENSP00000243253 | SEC61A1 | 1 | 0 | 0 | subnetwork1 |
| ENSP00000219473 | USP10 | 1 | 0 | 0 | subnetwork1 |
| ENSP00000244741 | CDKN1A | 1 | 0 | 0 | subnetwork1 |
| ENSP00000342235 | ERBB4 | 1 | 0 | 0 | subnetwork1 |
| ENSP00000268035 | IGF1R | 1 | 0 | 0 | subnetwork1 |
| ENSP00000355180 | COL6A1 | 1 | 0 | 0 | subnetwork1 |
| ENSP00000239223 | DUSP1 | 1 | 0 | 0 | subnetwork1 |
| ENSP00000250971 | INS | 1 | 0 | 0 | subnetwork1 |
| ENSP00000260227 | MMP7 | 1 | 0 | 0 | subnetwork1 |
| ENSP00000317272 | MET | 1 | 0 | 0 | subnetwork1 |
| ENSP00000263923 | KDR | 1 | 0 | 0 | subnetwork1 |
| ENSP00000356791 | DPT | 1 | 0 | 0 | subnetwork1 |
| ENSP00000325875 | HSP90AB1 | 1 | 0 | 0 | subnetwork1 |
| ENSP00000355896 | TGFB2 | 1 | 0 | 0 | subnetwork1 |
| ENSP00000325527 | FBN1 | 1 | 0 | 0 | subnetwork1 |
| ENSP00000216911 | AURKA | 1 | 0 | 0 | subnetwork1 |
| ENSP00000297848 | COL14A1 | 1 | 0 | 0 | subnetwork1 |
| ENSP00000269571 | ERBB2 | 1 | 0 | 0 | subnetwork1 |
| ENSP00000318585 | BACE1 | 1 | 0 | 0 | subnetwork1 |
| ENSP00000254301 | LGALS3 | 1 | 0 | 0 | subnetwork1 |
| ENSP00000266085 | TIMP3 | 1 | 0 | 0 | subnetwork1 |
| ENSP00000264144 | LAMC2 | 1 | 0 | 0 | subnetwork1 |
| ENSP00000347665 | COL18A1 | 1 | 0 | 0 | subnetwork1 |
| ENSP00000263341 | IL1B | 1 | 0 | 0 | subnetwork1 |
| ENSP00000355751 | THBS2 | 1 | 0 | 0 | subnetwork1 |
| ENSP00000287814 | TIMP4 | 1 | 0 | 0 | subnetwork1 |
| ENSP00000331210 | BCAN | 1 | 0 | 0 | subnetwork1 |
| ENSP00000323929 | A2M | 1 | 0 | 0 | subnetwork1 |
| ENSP00000262768 | TIMP2 | 1 | 0 | 0 | subnetwork1 |
| ENSP00000367832 | CCL7 | 1 | 0 | 0 | subnetwork1 |
| ENSP00000379140 | CXCL12 | 1 | 0 | 0 | subnetwork1 |
| ENSP00000363489 | GDF5 | 1 | 0 | 0 | subnetwork1 |
| ENSP00000361405 | MMP9 | 1 | 0 | 0 | subnetwork1 |
| ENSP00000303351 | ITGB1 | 1 | 0 | 0 | subnetwork1 |
| ENSP00000332371 | COL7A1 | 1 | 0 | 0 | subnetwork1 |
| ENSP00000337701 | PNPLA2 | 1 | 0 | 0 | subnetwork1 |
| ENSP00000302486 | MAP2K1 | 1 | 0 | 0 | subnetwork1 |
| ENSP00000329668 | SHC4 | 1 | 0 | 0 | subnetwork1 |
| ENSP00000406209 | EPN1 | 1 | 0 | 0 | subnetwork1 |
| ENSP00000262741 | PIK3R3 | 1 | 0 | 0 | subnetwork1 |
| ENSP00000428340 | ANGPT1 | 1 | 0 | 0 | subnetwork1 |
| ENSP00000363998 | ITCH | 1 | 0 | 0 | subnetwork1 |
| ENSP00000366563 | PIK3CD | 1 | 0 | 0 | subnetwork1 |
| ENSP00000343204 | JAK1 | 1 | 0 | 0 | subnetwork1 |
| ENSP00000340944 | PTPN11 | 1 | 0 | 0 | subnetwork1 |
| ENSP00000339007 | GRB2 | 1 | 0 | 0 | subnetwork1 |
| ENSP00000366936 | SHB | 1 | 0 | 0 | subnetwork1 |
| ENSP00000354621 | SMURF1 | 1 | 0 | 0 | subnetwork1 |
| ENSP00000371347 | ANGPT4 | 1 | 0 | 0 | subnetwork1 |
| ENSP00000263967 | PIK3CA | 1 | 0 | 0 | subnetwork1 |
| ENSP00000290894 | SHF | 1 | 0 | 0 | subnetwork1 |
| ENSP00000300574 | CRK | 1 | 0 | 0 | subnetwork1 |
| ENSP00000346300 | CRKL | 1 | 0 | 0 | subnetwork1 |
| ENSP00000339191 | CAV1 | 1 | 0 | 0 | subnetwork1 |
| ENSP00000352121 | PIK3CG | 1 | 0 | 0 | subnetwork1 |
| ENSP00000341940 | CAV3 | 1 | 0 | 0 | subnetwork1 |
| ENSP00000422464 | PDGFC | 1 | 0 | 0 | subnetwork1 |
| ENSP00000264110 | ATF2 | 1 | 0 | 0 | subnetwork1 |
| ENSP00000304895 | IRS1 | 1 | 0 | 0 | subnetwork1 |
| ENSP00000364995 | SHC3 | 1 | 0 | 0 | subnetwork1 |
| ENSP00000268933 | EPN3 | 1 | 0 | 0 | subnetwork1 |
| ENSP00000264657 | STAT3 | 1 | 0 | 0 | subnetwork1 |
| ENSP00000354394 | STAT1 | 1 | 0 | 0 | subnetwork1 |
| ENSP00000320543 | EPN2 | 1 | 0 | 0 | subnetwork1 |
| ENSP00000268171 | FURIN | 1 | 0 | 0 | subnetwork1 |
| ENSP00000360798 | EPS15 | 1 | 0 | 0 | subnetwork1 |
| ENSP00000346508 | PDGFA | 1 | 0 | 0 | subnetwork1 |
| ENSP00000314897 | ANGPT2 | 1 | 0 | 0 | subnetwork1 |
| ENSP00000289153 | PIK3CB | 1 | 0 | 0 | subnetwork1 |
| ENSP00000264554 | SHC2 | 1 | 0 | 0 | subnetwork1 |
| ENSP00000327513 | CSF1 | 1 | 0 | 0 | subnetwork1 |
| ENSP00000264122 | CBLB | 1 | 0 | 0 | subnetwork1 |
| ENSP00000361125 | VEGFA | 1 | 0 | 0 | subnetwork1 |
| ENSP00000401303 | SHC1 | 1 | 0 | 0 | subnetwork1 |
| ENSP00000376865 | PDGFD | 1 | 0 | -1.79116625 | subnetwork1 |
| ENSP00000377836 | GPC3 | 1 | 0 | 0 | subnetwork1 |
| ENSP00000351605 | FZD6 | 1 | 0 | 0 | subnetwork1 |
| ENSP00000364860 | ROR2 | 1 | 0 | 0 | subnetwork1 |
| ENSP00000444972 | TCF7L2 | 1 | 0 | 0 | subnetwork1 |
| ENSP00000266066 | SFRP5 | 1 | 0 | 0 | subnetwork1 |
| ENSP00000287934 | FZD1 | 1 | 0 | 0 | subnetwork1 |
| ENSP00000286201 | FZD7 | 1 | 0 | 0 | subnetwork1 |
| ENSP00000354607 | FZD5 | 1 | 0 | 0 | subnetwork1 |
| ENSP00000269122 | CLTC | 1 | 0 | 0 | subnetwork1 |
| ENSP00000379258 | GLI3 | 1 | 0 | 0 | subnetwork1 |
| ENSP00000357040 | VANGL2 | 1 | 0 | 0 | subnetwork1 |
| ENSP00000274063 | SFRP2 | 1 | 0 | 0 | subnetwork1 |
| ENSP00000354586 | GLI2 | 1 | 0 | 0 | subnetwork1 |
| ENSP00000323901 | FZD2 | 1 | 0 | 0 | subnetwork1 |
| ENSP00000368169 | DVL1 | 1 | 0 | 0 | subnetwork1 |
| ENSP00000277541 | NOTCH1 | 1 | 0 | 0 | subnetwork1 |
| ENSP00000363826 | FZD8 | 1 | 0 | 0 | subnetwork1 |
| ENSP00000359305 | TMED5 | 1 | 0 | 0 | subnetwork1 |
| ENSP00000346829 | WLS | 1 | 0 | 0 | subnetwork1 |
| ENSP00000369375 | TEK | 1 | 0 | 0 | subnetwork1 |
| ENSP00000316054 | DVL3 | 1 | 0 | 0 | subnetwork1 |
| ENSP00000347942 | RET | 1 | 0 | 0 | subnetwork1 |
| ENSP00000302625 | AXIN2 | 1 | 0 | 0 | subnetwork1 |
| ENSP00000295113 | FRZB | 1 | 0 | 0 | subnetwork1 |
| ENSP00000344456 | CTNNB1 | 1 | 0 | 0 | subnetwork1 |
| ENSP00000283147 | BMP6 | 1 | 0 | 0 | subnetwork1 |
| ENSP00000340347 | TCF7 | 1 | 0 | 0 | subnetwork1 |
| ENSP00000294304 | LRP5 | 1 | 0 | 0 | subnetwork1 |
| ENSP00000363081 | DKK1 | 1 | 0 | 0 | subnetwork1 |
| ENSP00000434034 | FZD4 | 1 | 0 | 0 | subnetwork1 |
| ENSP00000324856 | STK11 | 1 | 0 | 0 | subnetwork1 |
| ENSP00000384179 | ZFPM2 | 1 | 0 | 0 | subnetwork1 |
| ENSP00000300651 | MED1 | 1 | 0 | 0 | subnetwork1 |
| ENSP00000357348 | HEY2 | 1 | 0 | 0 | subnetwork1 |
| ENSP00000338272 | HEY1 | 1 | 0 | 0 | subnetwork1 |
| ENSP00000362361 | CDK9 | 1 | 0 | 0 | subnetwork1 |
| ENSP00000276594 | PRDM14 | 1 | 0 | 0 | subnetwork1 |
| ENSP00000326630 | ZFPM1 | 1 | 0 | 0 | subnetwork1 |
| ENSP00000363095 | TRIM32 | 1 | 0 | 0 | subnetwork1 |
| ENSP00000386741 | CHN1 | 1 | 0 | 0 | subnetwork1 |
| ENSP00000357393 | EFNA3 | 1 | 0 | 0 | subnetwork1 |
| ENSP00000355026 | ARHGEF15 | 1 | 0 | 0 | subnetwork1 |
| ENSP00000363115 | FGR | 1 | 0 | 0 | subnetwork1 |
| ENSP00000310406 | RIN1 | 1 | 0 | 0 | subnetwork1 |
| ENSP00000400175 | RHOA | 1 | 0 | 0 | subnetwork1 |
| ENSP00000365514 | ZIC2 | 1 | 0 | 0 | subnetwork1 |
| ENSP00000327145 | FLNC | 1 | 0 | 0 | subnetwork1 |
| ENSP00000420213 | FLNB | 1 | 0 | 0 | subnetwork1 |
| ENSP00000377941 | ACTN1 | 1 | 0 | 0 | subnetwork1 |
| ENSP00000384515 | PARVB | 1 | 0 | 0 | subnetwork1 |
| ENSP00000391453 | PARVG | 1 | 0 | 0 | subnetwork1 |
| ENSP00000386896 | ITGA6 | 1 | 0 | 0 | subnetwork1 |
| ENSP00000367316 | ITGA8 | 1 | 0 | 0 | subnetwork1 |
| ENSP00000452120 | ITGA7 | 1 | 0 | 0 | subnetwork1 |
| ENSP00000316029 | TLN1 | 1 | 0 | 0 | subnetwork1 |
| ENSP00000355537 | ACTN2 | 1 | 0 | 0 | subnetwork1 |
| ENSP00000303476 | TLN2 | 1 | 0 | 0 | subnetwork1 |
| ENSP00000349252 | ITGAL | 1 | 0 | 0 | subnetwork1 |
| ENSP00000334008 | PARVA | 1 | 0 | 0 | subnetwork1 |
| ENSP00000368401 | PAX6 | 1 | 0 | 0 | subnetwork1 |
| ENSP00000327758 | NKX2-5 | 1 | 0 | 0 | subnetwork1 |
| ENSP00000363827 | HSPG2 | 1 | 0 | 0 | subnetwork1 |
| ENSP00000352455 | MFAP5 | 1 | 0 | 0 | subnetwork1 |
| ENSP00000356382 | F13B | 1 | 0 | 0 | subnetwork1 |
| ENSP00000441691 | ITGAM | 1 | 0 | 0 | subnetwork1 |
| ENSP00000351885 | PTPA | 1 | 0 | 0 | subnetwork1 |
| ENSP00000355865 | PARK2 | 1 | 0 | 0 | subnetwork1 |
| ENSP00000368884 | RPS6KA3 | 1 | 0 | 0 | subnetwork1 |
| ENSP00000362824 | OGT | 1 | 0 | 0 | subnetwork1 |
| ENSP00000353483 | MAPK8 | 1 | 0 | 0 | subnetwork1 |
| ENSP00000356832 | SGK1 | 1 | 0 | 0 | subnetwork1 |
| ENSP00000411397 | MARK3 | 1 | 0 | 0 | subnetwork1 |
| ENSP00000343325 | PKN1 | 1 | 0 | 0 | subnetwork1 |
| ENSP00000355884 | MARK1 | 1 | 0 | 0 | subnetwork1 |
| ENSP00000381412 | CAMK2A | 1 | 0 | 0 | subnetwork1 |
| ENSP00000385751 | MARK2 | 1 | 0 | 0 | subnetwork1 |
| ENSP00000368752 | PRNP | 1 | 0 | 0 | subnetwork1 |
| ENSP00000368880 | FOXO1 | 1 | 0 | 0 | subnetwork1 |
| ENSP00000363377 | FOXO4 | 1 | 0 | 0 | subnetwork1 |
| ENSP00000354558 | MTOR | 1 | 0 | 0 | subnetwork1 |
| ENSP00000418447 | PPP2CA | 1 | 0 | 0 | subnetwork1 |
| ENSP00000352929 | CSNK1E | 1 | 0 | 0 | subnetwork1 |
| ENSP00000408695 | PRKCA | 1 | 0 | 0 | subnetwork1 |
| ENSP00000356641 | RFWD2 | 1 | 0 | 0 | subnetwork1 |
| ENSP00000370938 | CDK8 | 1 | 0 | 0 | subnetwork1 |
| ENSP00000356150 | MDM4 | 1 | 0 | 0 | subnetwork1 |
| ENSP00000378699 | CDK1 | 1 | 0 | 0 | subnetwork1 |
| ENSP00000406157 | PAPSS2 | 1 | 0 | 1.04464055 | subnetwork1 |
| ENSP00000353847 | WWTR1 | 1 | 0 | 0 | subnetwork1 |
| ENSP00000395498 | PAX8 | 1 | 0 | 0 | subnetwork1 |
| ENSP00000376611 | TDG | 1 | 0 | 0 | subnetwork1 |
| ENSP00000363149 | SPDEF | 1 | 0 | 0 | subnetwork1 |
| ENSP00000473047 | KLK11 | 1 | 0 | 0 | subnetwork1 |
| ENSP00000370557 | MIS12 | 1 | 0 | 0 | subnetwork1 |
| ENSP00000352071 | CD163 | 1 | 0 | 0 | subnetwork1 |
| ENSP00000431872 | TPT1 | 1 | 0 | 0 | subnetwork1 |
| ENSP00000427562 | ABL2 | 1 | 0 | 0 | subnetwork1 |
| ENSP00000272167 | EPHX1 | 1 | 0 | 0 | subnetwork2 |
| ENSP00000360918 | CH25H | 1 | 0 | 0 | subnetwork2 |
| ENSP00000264027 | SC5D | 1 | 0 | 0 | subnetwork2 |
| ENSP00000265896 | SQLE | 1 | 0 | 0 | subnetwork2 |
| ENSP00000341662 | AGMO | 1 | 0 | 0 | subnetwork2 |
| ENSP00000320604 | FAXDC2 | 1 | 0 | 0 | subnetwork2 |
| ENSP00000354612 | PTGS1 | 1 | 0 | 0 | subnetwork2 |
| ENSP00000261507 | MSMO1 | 1 | 0 | 0 | subnetwork2 |
| ENSP00000356438 | PTGS2 | 1 | 0 | 0 | subnetwork2 |
| ENSP00000348762 | LSS | 1 | 0 | 0 | subnetwork2 |
| ENSP00000341625 | CYB5A | 1 | 0 | 0 | subnetwork2 |
| ENSP00000221444 | KCNA7 | 1 | 0 | 0 | subnetwork3 |
| ENSP00000252321 | KCNA5 | 1 | 0 | 0 | subnetwork3 |
| ENSP00000257981 | KCNH3 | 1 | 0 | 0 | subnetwork3 |
| ENSP00000262186 | KCNH2 | 1 | 0 | 0 | subnetwork3 |
| ENSP00000264661 | KCNH4 | 1 | 0 | 0 | subnetwork3 |
| ENSP00000271751 | KCNH1 | 1 | 0 | 0 | subnetwork3 |
| ENSP00000280684 | KCNA6 | 1 | 0 | 0 | subnetwork3 |
| ENSP00000314520 | KCNA2 | 1 | 0 | 0 | subnetwork3 |
| ENSP00000321427 | KCNH5 | 1 | 0 | 0 | subnetwork3 |
| ENSP00000328511 | KCNA4 | 1 | 0 | 0 | subnetwork3 |
| ENSP00000328813 | KCNH8 | 1 | 0 | 0 | subnetwork3 |
| ENSP00000331727 | KCNH7 | 1 | 0 | 0 | subnetwork3 |
| ENSP00000358784 | KCNA3 | 1 | 0 | 0 | subnetwork3 |
| ENSP00000358786 | KCNA10 | 1 | 0 | 0 | subnetwork3 |
| ENSP00000371985 | KCNA1 | 1 | 0 | 0 | subnetwork3 |
| ENSP00000463533 | KCNH6 | 1 | 0 | 0 | subnetwork3 |
| ENSP00000242152 | NPY | 1 | 0 | 0 | subnetwork4 |
| ENSP00000254235 | ADCY7 | 1 | 0 | 0 | subnetwork4 |
| ENSP00000260600 | ADCY3 | 1 | 0 | 0 | subnetwork4 |
| ENSP00000286355 | ADCY8 | 1 | 0 | 0 | subnetwork4 |
| ENSP00000286758 | CXCL13 | 1 | 0 | 0 | subnetwork4 |
| ENSP00000294016 | ADCY9 | 1 | 0 | 0 | subnetwork4 |
| ENSP00000297323 | ADCY1 | 1 | 0 | 0 | subnetwork4 |
| ENSP00000353198 | PYY | 1 | 0 | 0 | subnetwork4 |
| ENSP00000312126 | ADCY4 | 1 | 0 | 0 | subnetwork4 |
| ENSP00000311405 | ADCY6 | 1 | 0 | 0 | subnetwork4 |
| ENSP00000342952 | ADCY2 | 1 | 0 | 0 | subnetwork4 |
| ENSP00000419361 | ADCY5 | 1 | 0 | 0 | subnetwork4 |
| ENSP00000222399 | LAMB1 | 1 | 0 | 0 | subnetwork5 |
| ENSP00000258341 | LAMC1 | 1 | 0 | 0 | subnetwork5 |
| ENSP00000307156 | LAMB2 | 1 | 0 | 0 | subnetwork5 |
| ENSP00000346067 | RPSA | 1 | 0 | 0 | subnetwork5 |
| ENSP00000348384 | LAMB3 | 1 | 0 | 0 | subnetwork5 |
| ENSP00000355627 | AGT | 1 | 0 | 0 | subnetwork6 |
| ENSP00000420418 | ZNF398 | 1 | 0 | 0 | subnetwork6 |
| ENSP00000342070 | CTSB | 1 | 0 | 0 | subnetwork6 |
| ENSP00000296046 | CPA3 | 1 | 0 | 0 | subnetwork6 |
| ENSP00000446280 | PCSK5 | 1 | 0 | 0 | subnetwork6 |
| ENSP00000308024 | PCSK1 | 1 | 0 | 0 | subnetwork6 |
| ENSP00000367697 | ATP6AP2 | 1 | 0 | 0 | subnetwork6 |
| ENSP00000256637 | SORT1 | 1 | 0 | 0 | subnetwork7 |
| ENSP00000260197 | SORL1 | 1 | 0 | 0 | subnetwork7 |
| ENSP00000277120 | NTRK2 | 1 | 0 | 0 | subnetwork7 |
| ENSP00000297494 | NOS3 | 1 | 0 | 0 | subnetwork7 |
| ENSP00000387435 | ARTN | 1 | 0 | 0 | subnetwork7 |
| ENSP00000397297 | NTF3 | 1 | 0 | 0 | subnetwork7 |
| ENSP00000262094 | RAB27B | 1 | 0 | 0 | subnetwork8 |
| ENSP00000382177 | MYO5A | 1 | 0 | 0 | subnetwork8 |
| ENSP00000337761 | RAB27A | 1 | 0 | 0 | subnetwork8 |
| ENSP00000374036 | RPH3A | 1 | 0 | 0 | subnetwork8 |
| ENSP00000349415 | RAB18 | 1 | 0 | 0 | subnetwork8 |
| ENSP00000173229 | NTN1 | 1 | 0 | 0 | subnetwork9 |
| ENSP00000293973 | NTN3 | 1 | 0 | 0 | subnetwork9 |
| ENSP00000376921 | NTNG2 | 1 | 0 | 0 | subnetwork9 |
| ENSP00000359085 | NTNG1 | 1 | 0 | 0 | subnetwork9 |
| ENSP00000221494 | SF3A2 | 1 | 0 | 0 | subnetwork10 |
| ENSP00000310129 | PSMD2 | 1 | 0 | 0 | subnetwork10 |
| ENSP00000350708 | RAD23B | 1 | 0 | 0 | subnetwork10 |
| ENSP00000467024 | RAD23A | 1 | 0 | 0 | subnetwork10 |
| ENSP00000229307 | NANOG | 1 | 0 | 0 | subnetwork11 |
| ENSP00000376076 | SUMO1 | 1 | 0 | 0 | subnetwork11 |
| ENSP00000323588 | SOX2 | 1 | 0 | 0 | subnetwork11 |
| ENSP00000324897 | UBE2I | 1 | 0 | 0 | subnetwork11 |
| ENSP00000305529 | SIRPG | 1 | 0 | 0 | subnetwork12 |
| ENSP00000320084 | CD276 | 1 | 0 | 0 | subnetwork12 |
| ENSP00000364731 | F7 | 1 | 0 | 0 | subnetwork12 |
| ENSP00000364709 | F10 | 1 | 0 | 0 | subnetwork12 |
| ENSP00000177694 | TBX21 | 1 | 0 | 0 | subnetwork13 |
| ENSP00000239461 | PRRX1 | 1 | 0 | 1.252606949 | subnetwork13 |
| ENSP00000217244 | CSNK2A1 | 1 | 0 | 0 | subnetwork14 |
| ENSP00000261740 | TRPV4 | 1 | 0 | 0 | subnetwork14 |
| ENSP00000262506 | CSNK2A2 | 1 | 0 | 0 | subnetwork14 |
| ENSP00000255040 | APCS | 1 | 0 | 0 | subnetwork15 |
| ENSP00000415941 | C4B | 1 | 0 | 0 | subnetwork15 |
| ENSP00000377783 | PROS1 | 1 | 0 | 0 | subnetwork15 |
| ENSP00000258873 | ACSBG1 | 1 | 0 | 0 | subnetwork16 |
| ENSP00000264932 | SDHA | 1 | 0 | 0 | subnetwork16 |
| ENSP00000281455 | ACSL1 | 1 | 0 | 0 | subnetwork16 |
| ENSP00000161559 | CEACAM1 | 1 | 0 | 0 | subnetwork17 |
| ENSP00000244336 | CEACAM8 | 1 | 0 | 0 | subnetwork17 |
| ENSP00000308938 | PLG | 1 | 0 | 0 | subnetwork18 |
| ENSP00000308541 | F2 | 1 | 0 | 0 | subnetwork18 |
| ENSP00000296387 | CLDN19 | 1 | 0 | 0 | subnetwork19 |
| ENSP00000299339 | CLDN10 | 1 | 0 | 0 | subnetwork19 |
| ENSP00000230354 | TBP | 1 | 0 | 0 | subnetwork20 |
| ENSP00000359531 | GTF2B | 1 | 0 | 0 | subnetwork20 |
| ENSP00000260010 | TLR2 | 1 | 0 | 0 | subnetwork21 |
| ENSP00000361400 | SFTPA2 | 1 | 0 | 0 | subnetwork21 |
